# Supplementary material for: Efficient and regioselective synthesis of ortho -diiodinated homobenzylic alcohol derivatives: in silico evaluation as potential anticancer IDO/TDO inhibitors
Source: Royal Society of Chemistry journal article supplement (doi:10.1039/d4ob01076k), 2024-01-01
Supplement: d4ob01076k1.pdf [file d4ob01076k1.pdf]

## Table of Contents

|                                                                                                                                       |           |
|---------------------------------------------------------------------------------------------------------------------------------------|-----------|
| Table of Contents.....                                                                                                                | 1         |
| <b>I. Experimental Details and Compound Data.....</b>                                                                                 | <b>4</b>  |
| <b>I.1 General Information.....</b>                                                                                                   | <b>4</b>  |
| <b>I.2 General procedure for Metal-Iodine Exchange reaction of 5-substituted-1,2,3-triiodoarenes.....</b>                             | <b>4</b>  |
| I.2.1 Synthesis of 1-(2,6-diiodophenyl)butan-2-ol ( <b>7a</b> ).....                                                                  | 5         |
| I.2.2 Synthesis of (S)-1-(benzyloxy)-3-(2,6-diiodophenyl)propan-2-ol ( <b>7b</b> ).....                                               | 5         |
| I.2.3 Synthesis of 1-(4-bromophenoxy)-3-(2,6-diiodophenyl)propan-2-ol ( <b>7c</b> ).....                                              | 6         |
| I.2.4 Synthesis of 1-(tert-butoxy)-3-(2,6-diiodophenyl)propan-2-ol ( <b>7d</b> ).....                                                 | 6         |
| I.2.5 Synthesis of 1-(2,6-diiodophenyl)-3-(2-methoxyphenoxy)propan-2-ol ( <b>7e</b> ).....                                            | 6         |
| I.2.6 Synthesis of 1-(2,6-diiodo-4-methylphenyl)butan-2-ol ( <b>7f</b> ).....                                                         | 7         |
| I.2.7 Synthesis of 1-(2,6-diiodo-4-methylphenyl)-3-methoxypropan-2-ol ( <b>7g</b> ).....                                              | 7         |
| I.2.8 Synthesis of 1-(tert-butoxy)-3-(2,6-diiodo-4-methylphenyl)propan-2-ol ( <b>7h</b> ).....                                        | 7         |
| I.2.9 Synthesis of 2-(2,6-diiodo-4-methylphenyl)-1-phenylethan-1-ol ( <b>7i</b> ).....                                                | 8         |
| I.2.10 Synthesis of (S)-1-(benzyloxy)-3-(2,6-diiodo-4-methylphenyl)propan-2-ol ( <b>7j</b> ).....                                     | 8         |
| I.2.11 Synthesis of 1-(2,6-diiodo-4-methylphenyl)-3-(2-methoxyphenoxy)propan-2-ol ( <b>7k</b> ).....                                  | 9         |
| I.2.12 Synthesis of 1-(4-bromophenoxy)-3-(2,6-diiodo-4-methylphenyl)propan-2-ol ( <b>7l</b> ).....                                    | 9         |
| I.2.13 Synthesis of 1-(4-fluoro-2,6-diiodophenyl)butan-2-ol ( <b>7m</b> ).....                                                        | 9         |
| I.2.14 Synthesis of (S)-1-(benzyloxy)-3-(4-fluoro-2,6-diiodophenyl)propan-2-ol ( <b>7n</b> ).....                                     | 10        |
| I.2.15 Synthesis of 1-(4-chloro-2,6-diiodophenyl)butan-2-ol ( <b>7o</b> ).....                                                        | 10        |
| I.2.16 Synthesis of (S)-1-(benzyloxy)-3-(4-chloro-2,6-diiodophenyl)propan-2-ol ( <b>7p</b> ).....                                     | 11        |
| I.2.17 Synthesis of 1-(4-chloro-2,6-diiodophenyl)-3-(2-methoxyphenoxy)propan-2-ol ( <b>7q</b> ).....                                  | 11        |
| I.2.18 Synthesis of 1-(4-chloro-2,6-diiodophenyl)-3-(o-tolyloxy)propan-2-ol ( <b>7r</b> ).....                                        | 11        |
| I.2.19 Synthesis of 1-(4-bromophenoxy)-3-(4-chloro-2,6-diiodophenyl)propan-2-ol ( <b>7s</b> ).....                                    | 12        |
| I.2.20 Synthesis of 1-(4-bromo-2,6-diiodophenyl)butan-2-ol ( <b>7t</b> ).....                                                         | 12        |
| I.2.21 Synthesis of (S)-1-(benzyloxy)-3-(4-bromo-2,6-diiodophenyl)propan-2-ol ( <b>7u</b> ).....                                      | 13        |
| I.2.22 Synthesis of 1-(2,6-diiodo-4-methoxyphenyl)butan-2-ol ( <b>7v</b> ).....                                                       | 13        |
| I.2.23 Synthesis of 1-(2,6-diiodo-4-methoxyphenyl)-3-methoxypropan-2-ol ( <b>7w</b> ).....                                            | 13        |
| I.2.24 Synthesis of 1-(tert-butoxy)-3-(2,6-diiodo-4-methoxyphenyl)propan-2-ol ( <b>7x</b> ).....                                      | 14        |
| I.2.25 Synthesis of 2-(2,6-diiodo-4-methoxyphenyl)-1-phenylethan-1-ol ( <b>7y</b> ).....                                              | 14        |
| I.2.26 Synthesis of (S)-1-(benzyloxy)-3-(2,6-diiodo-4-methoxyphenyl)propan-2-ol ( <b>7z</b> ).....                                    | 15        |
| I.2.27 Synthesis of 1-(2,6-diiodo-4-methoxyphenyl)-3-(2-methoxyphenoxy)propan-2-ol ( <b>7aa</b> ).....                                | 15        |
| I.2.28 Synthesis of 1-(4-bromophenoxy)-3-(2,6-diiodo-4-methoxyphenyl)propan-2-ol ( <b>7ab</b> ).....                                  | 16        |
| I.2.29 Synthesis of ethyl 3-(2,6-diiodo-4-methoxyphenyl)-2-hydroxypropanoate ( <b>7ac</b> ).....                                      | 16        |
| I.2.30 Synthesis of methyl 4-(2-hydroxybutyl)-3,5-diiodobenzoate ( <b>7ad</b> ).....                                                  | 16        |
| I.2.31 Synthesis of 1-(2-chloro-6-iodophenyl)butan-2-ol ( <b>7ae</b> ).....                                                           | 17        |
| I.2.32 Synthesis of 1-(2-bromo-6-iodophenyl)butan-2-ol ( <b>7af</b> ).....                                                            | 17        |
| <b>I.3 NMR Spectra for New Compounds.....</b>                                                                                         | <b>18</b> |
| I.3.1 <sup>1</sup> H-NMR of 1-(2,6-diiodophenyl)butan-2-ol ( <b>7a</b> ) in d-CDCl <sub>3</sub> at 25 °C.....                         | 18        |
| I.3.2 <sup>13</sup> C-NMR of 1-(2,6-diiodophenyl)butan-2-ol ( <b>7a</b> ) in d-CDCl <sub>3</sub> at 25 °C.....                        | 19        |
| I.3.3 <sup>1</sup> H-NMR of (S)-1-(benzyloxy)-3-(2,6-diiodophenyl)propan-2-ol ( <b>7b</b> ) in d-CDCl <sub>3</sub> at 25 °C.....      | 20        |
| I.3.4 <sup>13</sup> C-NMR of (S)-1-(benzyloxy)-3-(2,6-diiodophenyl)propan-2-ol ( <b>7b</b> ) in d-CDCl <sub>3</sub> at 25 °C.....     | 21        |
| I.3.5 <sup>1</sup> H-NMR of 1-(4-bromophenoxy)-3-(2,6-diiodophenyl)propan-2-ol ( <b>7c</b> ) in d-CDCl <sub>3</sub> at 25 °C.....     | 22        |
| I.3.6 <sup>13</sup> C-NMR of 1-(4-bromophenoxy)-3-(2,6-diiodophenyl)propan-2-ol ( <b>7c</b> ) in d-CDCl <sub>3</sub> at 25 °C.....    | 23        |
| I.3.7 <sup>1</sup> H-NMR of 1-(tert-butoxy)-3-(2,6-diiodophenyl)propan-2-ol ( <b>7d</b> ) in d-CDCl <sub>3</sub> at 25 °C.....        | 24        |
| I.3.8 <sup>13</sup> C-NMR of 1-(tert-butoxy)-3-(2,6-diiodophenyl)propan-2-ol ( <b>7d</b> ) in d-CDCl <sub>3</sub> at 25 °C.....       | 25        |
| I.3.9 <sup>1</sup> H-NMR of 1-(2,6-diiodophenyl)-3-(2-methoxyphenoxy)propan-2-ol ( <b>7e</b> ) in d-CDCl <sub>3</sub> at 25 °C.....   | 26        |
| I.3.10 <sup>13</sup> C-NMR of 1-(2,6-diiodophenyl)-3-(2-methoxyphenoxy)propan-2-ol ( <b>7e</b> ) in d-CDCl <sub>3</sub> at 25 °C..... | 27        |

|        |                                                                                                                                                 |    |
|--------|-------------------------------------------------------------------------------------------------------------------------------------------------|----|
| 1.3.11 | <sup>1</sup> H-NMR of 1-(2,6-diiodo-4-methylphenyl)butan-2-ol ( <b>7f</b> ) in d-CDCl <sub>3</sub> at 25 °C.....                                | 28 |
| 1.3.12 | <sup>13</sup> C-NMR of 1-(2,6-diiodo-4-methylphenyl)butan-2-ol ( <b>7f</b> ) in d-CDCl <sub>3</sub> at 25 °C. ....                              | 29 |
| 1.3.13 | <sup>1</sup> H-NMR of 1-(2,6-diiodo-4-methylphenyl)-3-methoxypropan-2-ol ( <b>7g</b> ) in d-CDCl <sub>3</sub> at 25 °C.....                     | 30 |
| 1.3.14 | <sup>13</sup> C-NMR of 1-(2,6-diiodo-4-methylphenyl)-3-methoxypropan-2-ol ( <b>7g</b> ) in d-CDCl <sub>3</sub> at 25 °C.....                    | 31 |
| 1.3.15 | <sup>1</sup> H-NMR of 1-(tert-butoxy)-3-(2,6-diiodo-4-methylphenyl)propan-2-ol ( <b>7h</b> ) in d-CDCl <sub>3</sub> at 25 °C.....               | 32 |
| 1.3.16 | <sup>13</sup> C-NMR of 1-(tert-butoxy)-3-(2,6-diiodo-4-methylphenyl)propan-2-ol ( <b>7h</b> ) in d-CDCl <sub>3</sub> at 25 °C.....              | 33 |
| 1.3.17 | <sup>1</sup> H-NMR of 2-(2,6-diiodo-4-methylphenyl)-1-phenylethan-1-ol ( <b>7i</b> ) in d-CDCl <sub>3</sub> at 25 °C.....                       | 34 |
| 1.3.18 | <sup>13</sup> C-NMR of 2-(2,6-diiodo-4-methylphenyl)-1-phenylethan-1-ol ( <b>7i</b> ) in d-CDCl <sub>3</sub> at 25 °C. ....                     | 35 |
| 1.3.19 | <sup>1</sup> H-NMR of (S)-1-(benzyloxy)-3-(2,6-diiodo-4-methylphenyl)propan-2-ol ( <b>7j</b> ) in d-CDCl <sub>3</sub> at 25 °C.....             | 36 |
| 1.3.20 | <sup>13</sup> C-NMR of (S)-1-(benzyloxy)-3-(2,6-diiodo-4-methylphenyl)propan-2-ol ( <b>7j</b> ) in d-CDCl <sub>3</sub> at 25 °C.....            | 37 |
| 1.3.21 | <sup>1</sup> H-NMR of 1-(2,6-diiodo-4-methylphenyl)-3-(2-methoxyphenoxy) propan-2-ol ( <b>7k</b> ) in d-CDCl <sub>3</sub> at 25 °C..            | 38 |
| 1.3.22 | <sup>13</sup> C-NMR of 1-(2,6-diiodo-4-methylphenyl)-3-(2-methoxyphenoxy) propan-2-ol ( <b>7k</b> ) in d-CDCl <sub>3</sub> at 25 °C..           | 39 |
| 1.3.23 | <sup>1</sup> H-NMR of 1-(4-bromophenoxy)-3-(2,6-diiodo-4-methylphenyl)propan-2-ol ( <b>7l</b> ) in d-CDCl <sub>3</sub> at 25 °C.....            | 40 |
| 1.3.24 | <sup>13</sup> C-NMR of 1-(4-bromophenoxy)-3-(2,6-diiodo-4-methylphenyl)propan-2-ol ( <b>7l</b> ) in d-CDCl <sub>3</sub> at 25 °C.....           | 41 |
| 1.3.25 | <sup>1</sup> H-NMR of 1-(4-fluoro-2,6-diiodophenyl)butan-2-ol ( <b>7m</b> ) in d-CDCl <sub>3</sub> at 25 °C.....                                | 42 |
| 1.3.26 | <sup>13</sup> C-NMR of 1-(4-fluoro-2,6-diiodophenyl)butan-2-ol ( <b>7m</b> ) in d-CDCl <sub>3</sub> at 25 °C.....                               | 43 |
| 1.3.27 | <sup>1</sup> H-NMR of (S)-1-(benzyloxy)-3-(4-fluoro-2,6-diiodophenyl)propan-2-ol ( <b>7n</b> ) in d-CDCl <sub>3</sub> at 25 °C.....             | 44 |
| 1.3.28 | <sup>13</sup> C-NMR of (S)-1-(benzyloxy)-3-(4-fluoro-2,6-diiodophenyl)propan-2-ol ( <b>7n</b> ) in d-CDCl <sub>3</sub> at 25 °C.....            | 45 |
| 1.3.29 | <sup>1</sup> H-NMR of 1-(4-chloro-2,6-diiodophenyl)butan-2-ol ( <b>7o</b> ) in d-CDCl <sub>3</sub> at 25 °C.....                                | 46 |
| 1.3.30 | <sup>13</sup> C-NMR of 1-(4-chloro-2,6-diiodophenyl)butan-2-ol ( <b>7o</b> ) in d-CDCl <sub>3</sub> at 25 °C. ....                              | 47 |
| 1.3.31 | <sup>1</sup> H-NMR of (S)-1-(benzyloxy)-3-(4-chloro-2,6-diiodophenyl)propan-2-ol ( <b>7p</b> ) in d-CDCl <sub>3</sub> at 25 °C.....             | 48 |
| 1.3.32 | <sup>13</sup> C-NMR of (S)-1-(benzyloxy)-3-(4-chloro-2,6-diiodophenyl)propan-2-ol ( <b>7p</b> ) in d-CDCl <sub>3</sub> at 25 °C.....            | 49 |
| 1.3.33 | <sup>1</sup> H-NMR of 1-(4-chloro-2,6-diiodophenyl)-3-(2-methoxyphenoxy) propan-2-ol ( <b>7q</b> ) in d-CDCl <sub>3</sub> at 25 °C. .           | 50 |
| 1.3.34 | <sup>13</sup> C-NMR of 1-(4-chloro-2,6-diiodophenyl)-3-(2-methoxyphenoxy) propan-2-ol ( <b>7q</b> ) in d-CDCl <sub>3</sub> at 25 °C. .          | 51 |
| 1.3.35 | <sup>1</sup> H-NMR of 1-(4-chloro-2,6-diiodophenyl)-3-(o-tolyloxy)propan-2-ol ( <b>7r</b> ) in d-CDCl <sub>3</sub> at 25 °C.....                | 52 |
| 1.3.36 | <sup>13</sup> C-NMR of 1-(4-chloro-2,6-diiodophenyl)-3-(o-tolyloxy)propan-2-ol ( <b>7r</b> ) in d-CDCl <sub>3</sub> at 25 °C.....               | 53 |
| 1.3.37 | <sup>1</sup> H-NMR of 1-(4-bromophenoxy)-3-(4-chloro-2,6-diiodophenyl)propan-2-ol ( <b>7s</b> ) in d-CDCl <sub>3</sub> at 25 °C. ....           | 54 |
| 1.3.38 | <sup>13</sup> C-NMR of 1-(4-bromophenoxy)-3-(4-chloro-2,6-diiodophenyl)propan-2-ol ( <b>7s</b> ) in d-CDCl <sub>3</sub> at 25 °C.....           | 55 |
| 1.3.39 | <sup>1</sup> H-NMR of 1-(4-bromo-2,6-diiodophenyl)butan-2-ol ( <b>7t</b> ) in d-CDCl <sub>3</sub> at 25 °C.....                                 | 56 |
| 1.3.40 | <sup>13</sup> C-NMR of 1-(4-bromo-2,6-diiodophenyl)butan-2-ol ( <b>7t</b> ) in d-CDCl <sub>3</sub> at 25 °C.....                                | 57 |
| 1.3.41 | <sup>1</sup> H-NMR of (S)-1-(benzyloxy)-3-(4-bromo-2,6-diiodophenyl)propan-2-ol ( <b>7u</b> ) in d-CDCl <sub>3</sub> at 25 °C.....              | 58 |
| 1.3.42 | <sup>13</sup> C-NMR of (S)-1-(benzyloxy)-3-(4-bromo-2,6-diiodophenyl)propan-2-ol ( <b>7u</b> ) in d-CDCl <sub>3</sub> at 25 °C.....             | 59 |
| 1.3.43 | <sup>1</sup> H-NMR of 1-(2,6-diiodo-4-methoxyphenyl)butan-2-ol ( <b>7v</b> ) in d-CDCl <sub>3</sub> at 25 °C. ....                              | 60 |
| 1.3.44 | <sup>13</sup> C-NMR of 1-(2,6-diiodo-4-methoxyphenyl)butan-2-ol ( <b>7v</b> ) in d-CDCl <sub>3</sub> at 25 °C.....                              | 61 |
| 1.3.45 | <sup>1</sup> H-NMR of 1-(2,6-diiodo-4-methoxyphenyl)-3-methoxypropan-2-ol ( <b>7w</b> ) in d-CDCl <sub>3</sub> at 25 °C.....                    | 62 |
| 1.3.46 | <sup>13</sup> C-NMR of 1-(2,6-diiodo-4-methoxyphenyl)-3-methoxypropan-2-ol ( <b>7w</b> ) in d-CDCl <sub>3</sub> at 25 °C.....                   | 63 |
| 1.3.47 | <sup>1</sup> H-NMR of 1-(tert-butoxy)-3-(2,6-diiodo-4-methoxyphenyl)propan-2-ol ( <b>7x</b> ) in d-CDCl <sub>3</sub> at 25 °C.....              | 64 |
| 1.3.48 | <sup>13</sup> C-NMR of 1-(tert-butoxy)-3-(2,6-diiodo-4-methoxyphenyl)propan-2-ol ( <b>7x</b> ) in d-CDCl <sub>3</sub> at 25 °C.....             | 65 |
| 1.3.49 | <sup>1</sup> H-NMR of 2-(2,6-diiodo-4-methoxyphenyl)-1-phenylethan-1-ol ( <b>7y</b> ) in d-CDCl <sub>3</sub> at 25 °C.....                      | 66 |
| 1.3.50 | <sup>13</sup> C-NMR of 2-(2,6-diiodo-4-methoxyphenyl)-1-phenylethan-1-ol ( <b>7y</b> ) in d-CDCl <sub>3</sub> at 25 °C.....                     | 67 |
| 1.3.51 | <sup>1</sup> H-NMR of (S)-1-(benzyloxy)-3-(2,6-diiodo-4-methoxyphenyl)propan-2-ol ( <b>7z</b> ) in d-CDCl <sub>3</sub> at 25 °C.....            | 68 |
| 1.3.52 | <sup>13</sup> C-NMR of (S)-1-(benzyloxy)-3-(2,6-diiodo-4-methoxyphenyl)propan-2-ol ( <b>7z</b> ) in d-CDCl <sub>3</sub> at 25 °C.....           | 69 |
| 1.3.53 | <sup>1</sup> H-NMR of 1-(2,6-diiodo-4-methoxyphenyl)-3-(2-methoxyphenoxy) propan-2-ol ( <b>7aa</b> ) in d-CDCl <sub>3</sub> at 25 °C.<br>.....  | 70 |
| 1.3.54 | <sup>13</sup> C-NMR of 1-(2,6-diiodo-4-methoxyphenyl)-3-(2-methoxyphenoxy) propan-2-ol ( <b>7aa</b> ) in d-CDCl <sub>3</sub> at 25 °C.<br>..... | 71 |
| 1.3.55 | <sup>1</sup> H-NMR of 1-(4-bromophenoxy)-3-(2,6-diiodo-4-methoxyphenyl) propan-2-ol ( <b>7ab</b> ) in d-CDCl <sub>3</sub> at 25 °C.72           |    |
| 1.3.56 | <sup>13</sup> C-NMR of 1-(4-bromophenoxy)-3-(2,6-diiodo-4-methoxyphenyl) propan-2-ol ( <b>7ab</b> ) in d-CDCl <sub>3</sub> at 25 °C.73          |    |
| 1.3.57 | <sup>1</sup> H-NMR of ethyl 3-(2,6-diiodo-4-methoxyphenyl)-2-hydroxypropanoate ( <b>7ac</b> ) in d-CDCl <sub>3</sub> at 25 °C. ....             | 74 |
| 1.3.58 | <sup>13</sup> C-NMR of ethyl 3-(2,6-diiodo-4-methoxyphenyl)-2-hydroxypropanoate ( <b>7ac</b> ) in d-CDCl <sub>3</sub> at 25 °C.....             | 75 |
| 1.3.59 | <sup>1</sup> H-NMR of methyl 4-(2-hydroxybutyl)-3,5-diiodobenzoate ( <b>7ad</b> ) in d-CDCl <sub>3</sub> at 25 °C. ....                         | 76 |
| 1.3.60 | <sup>13</sup> C-NMR of methyl 4-(2-hydroxybutyl)-3,5-diiodobenzoate ( <b>7ad</b> ) in d-CDCl <sub>3</sub> at 25 °C.....                         | 77 |
| 1.3.61 | <sup>1</sup> H-NMR of 1-(2-chloro-6-iodophenyl)butan-2-ol ( <b>7ae</b> ) in d-CDCl <sub>3</sub> at 25 °C. ....                                  | 78 |
| 1.3.62 | <sup>13</sup> C-NMR of 1-(2-chloro-6-iodophenyl)butan-2-ol ( <b>7ae</b> ) in d-CDCl <sub>3</sub> at 25 °C. ....                                 | 79 |

|        |                                                                                                               |    |
|--------|---------------------------------------------------------------------------------------------------------------|----|
| 1.3.63 | <sup>1</sup> H-NMR of 1-(2-bromo-6-iodophenyl)butan-2-ol ( <b>7af</b> ) in d-CDCl <sub>3</sub> at 25 °C.....  | 80 |
| 1.3.64 | <sup>13</sup> C-NMR of 1-(2-bromo-6-iodophenyl)butan-2-ol ( <b>7af</b> ) in d-CDCl <sub>3</sub> at 25 °C..... | 81 |
| 1.4    | <b>X-ray of new compounds</b> .....                                                                           | 79 |
| 1.4.1  | X-ray data of 1-(2,6-diiodo-4-methylphenyl)-3-methoxypropan-2-ol ( <b>7g</b> ) .....                          | 79 |
| 1.4.2  | X-ray data of 1-(2,6-diiodo-4-methylphenyl)-3-(2-methoxyphenoxy)propan-2-ol ( <b>7k</b> ) .....               | 99 |

## **I. Experimental Details and Compound Data**

### **I.1 General Information**

All commercial reagents and chromatography solvents were used as obtained unless otherwise stated. Ethanol, toluene, ethyl acetate, hexanes, anhydrous sodium sulfate ( $\text{Na}_2\text{SO}_4$ , BDH). Anhydrous solvents were distilled over appropriate drying agents prior to use. Analytical thin layer chromatography (TLC) was performed on Merck silica gel 60 F<sub>254</sub>. Merck Silica gel 60 (0.063 - 0.2 mm) was used for column chromatography. Visualization of TLC was accomplished with UV light (254 nm). NMR spectra were recorded on a Bruker-Avance 400 MHz spectrometer. The residual solvent protons ( $^1\text{H}$ ) or the solvent carbon ( $^{13}\text{C}$ ) were used as internal standards.  $^1\text{H}$ -NMR data are presented as follows: chemical shift in ppm ( $\delta$ ) downfield from trimethylsilane (multiplicity, integration, coupling constant). The following abbreviations are used in reporting NMR data: s, singlet; bs, broad singlet; d, doublet; t, triplet; q, quartet; dq, doublet of quartets; dd, doublet of doublets; m, multiplet. High resolution mass spectra were recorded using Chemical Ionization (CI) and Electrospray ionization (ESI) techniques.

### **I.2 General procedure for Metal-Iodine Exchange reaction of 5-substituted-1,2,3-triiodoarenes**

In a flame-dried round bottom flask, isopropylmagnesium chloride (2M in THF, 1.2 equiv., 0.39 mL, 0.79 mmol) was added to a solution of 1,2,3-triiodoarene (0.66 mmol, 1.0 equiv.) in THF (6.5 mL) at  $-78\text{ }^\circ\text{C}$ . The mixture was stirred at that temperature for 2 h and then, the oxirane (1.1 equiv.) was added slowly. The solution was slowly warmed to room temperature and stirred overnight. Saturated  $\text{NH}_4\text{Cl}$  was added and the resulting mixture was stirred for

30 min at room temperature. The aqueous layer was extracted with Et<sub>2</sub>O (2 X 50 mL). Organic layers were combined and washed with brine, dried with Na<sub>2</sub>SO<sub>4</sub>, filtered and then the solvent was evaporated under reduced pressure. The crude product was purified by chromatography (5% EtOAc/hexane) to yield the pure desired product.

### 1.2.1 Synthesis of 1-(2,6-diiodophenyl)butan-2-ol (7a)

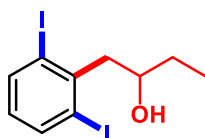

The title compound was prepared using the general procedure for Metal-Iodine Exchange reaction and isolated as colorless oil (**66%** yields).  $\delta_{\text{H}}$  (400MHz, *d*-CDCl<sub>3</sub>)  $\delta$ : 7.85 (d, 2H, *J* = 7.8 Hz), 6.54 (t, 1H, *J* = 7.8 Hz), 3.97 (bs, 1H), 3.26-3.29 (m, 2H), 1.64-1.70 (m, 2H), 1.44 (d, 1H, *J* = 5.8 Hz), 1.05 (t, 3H, *J* = 7.3 Hz).  $\delta_{\text{C}}$  (100 MHz, *d*-CDCl<sub>3</sub>)  $\delta$ : 143.4, 140.5, 129.9, 100.7, 73.5, 52.5, 30.7, 10.3. **HRMS** (ESI) *m/z* for C<sub>10</sub>H<sub>12</sub>I<sub>2</sub>NaO [M+Na]<sup>+</sup>: calcd. 424.8875; found, 424.8869.

### 1.2.2 Synthesis of (S)-1-(benzyloxy)-3-(2,6-diiodophenyl)propan-2-ol (7b)

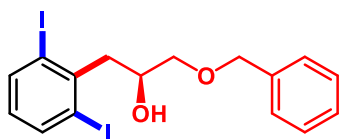

The title compound was prepared using the general procedure for Metal-Iodine Exchange reaction and isolated as colorless oil (**70%** yields).  $\delta_{\text{H}}$  (400MHz, *d*-CDCl<sub>3</sub>)  $\delta$ : 7.85 (d, 2H, *J* = 7.8 Hz), 7.26-7.38 (m, 5H), 6.54 (t, 1H, *J* = 7.8 Hz), 4.61 (s, 2H), 4.23-4.28 (m, 1H), 3.61 (d, 2H, *J* = 4.7Hz), 3.45 (dd, 1H, *J* = 8.1 Hz, *J* = 13.9 Hz), 3.23 (dd, 1H, *J* = 5.6 Hz, *J* = 13.9 Hz), 2.40 (d, 1H, *J* = 4.0 Hz).  $\delta_{\text{C}}$  (100 MHz, *d*-CDCl<sub>3</sub>)  $\delta$ : 142.8, 140.5, 138.1, 129.9, 128.6, 127.9, 127.8, 100.7, 73.9, 73.6, 70.8, 49.2. **HRMS** (ESI) *m/z* for C<sub>16</sub>H<sub>16</sub>I<sub>2</sub>NaO<sub>2</sub> [M+Na]<sup>+</sup>: calcd. 516.9137; found, 516.9131.

### 1.2.3 Synthesis of 1-(4-bromophenoxy)-3-(2,6-diiodophenyl)propan-2-ol (7c)

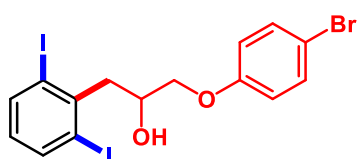

The title compound was prepared using the general procedure for Metal-Iodine Exchange reaction and isolated as white solid (**58%** yields).  $\delta_{\text{H}}$  (400MHz, *d*-CDCl<sub>3</sub>)  $\delta$ : 7.87 (d, 2H, *J* = 7.9 Hz), 7.38 (d, 2H, *J* = 8.8 Hz), 6.81 (d, 2H, *J* = 8.8 Hz), 6.54 (dd, 1H, *J* = 7.9Hz, *J* = 7.8 Hz), 4.42 (bs, 1H) 4.01-4.09 (m, 2H), 3.54 (dd, 1H, *J* = 7.8 Hz, *J* = 14.0 Hz), 3.38 (dd, 1H, *J* = 6.3 Hz, *J* = 13.9 Hz), 2.34 (d, 1H, *J* = 5.5 Hz).  $\delta_{\text{C}}$  (100 MHz, *d*-CDCl<sub>3</sub>)  $\delta$ : 157.8, 142.2, 140.7, 132.5, 130.2, 116.5, 113.5, 100.7, 71.7, 70.4, 49.2. **M.p.**: 94-96 °C. **HRMS** (ESI) *m/z* for C<sub>15</sub>H<sub>13</sub>BrI<sub>2</sub>NaO<sub>2</sub> [M+Na]<sup>+</sup>: calcd. 580.8086; found, 580.8078.

### 1.2.4 Synthesis of 1-(tert-butoxy)-3-(2,6-diiodophenyl)propan-2-ol (7d)

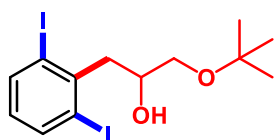

The title compound was prepared using the general procedure for Metal-Iodine Exchange reaction and isolated as colorless oil (**69%** yields).  $\delta_{\text{H}}$  (400MHz, *d*-CDCl<sub>3</sub>)  $\delta$ : 7.85 (d, 2H, *J* = 7.9 Hz), 6.51 (dd, 1H, *J* = 7.9 Hz, *J* = 7.8 Hz), 4.08-4.15 (m, 1H), 3.41-3.48 (m, 3H), 3.15 (dd, 1H, *J* = 5.8 Hz, *J* = 13.9 Hz), 2.50 (d, 1H, *J* = 5.0 Hz), 1.22 (s, 9H).  $\delta_{\text{C}}$  (100 MHz, *d*-CDCl<sub>3</sub>)  $\delta$ : 143.1, 140.5, 129.8, 100.7, 73.5, 70.9, 65.5, 49.3, 27.8. **HRMS** (ESI) *m/z* for C<sub>13</sub>H<sub>18</sub>I<sub>2</sub>NaO<sub>2</sub> [M+Na]<sup>+</sup>: calcd. 482.9294; found, 482.9287.

### 1.2.5 Synthesis of 1-(2,6-diiodophenyl)-3-(2-methoxyphenoxy)propan-2-ol (7e)

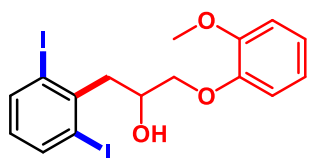

The title compound was prepared using the general procedure for Metal-Iodine Exchange reaction and isolated as white solid (**60%** yields).  $\delta_{\text{H}}$  (400MHz, *d*-CDCl<sub>3</sub>)  $\delta$ : 7.86 (d, 2H, *J* = 7.8 Hz), 6.88-6.95 (m, 4H), 6.54 (t, 1H, *J* = 7.8 Hz), 4.44 (bs, 1H) 4.11-4.16 (m, 2H), 3.85 (s, 3H), 3.54 (dd, 1H, *J* = 7.5 Hz, *J* = 13.6 Hz), 3.34 (dd, 1H, *J* = 6.2 Hz, *J* = 13.6 Hz), 2.97(d, 1H, *J* = 4.0 Hz).  $\delta_{\text{C}}$  (100

MHz, *d*-CDCl<sub>3</sub>)  $\delta$ : 150.1, 148.5, 142.6, 140.6, 130.1, 122.3, 121.2, 115.5, 112.3, 100.7, 74.1, 70.5, 56.1, 49.1. **M.p.**: 130-132 °C. **HRMS** (ESI) *m/z* for C<sub>16</sub>H<sub>16</sub>I<sub>2</sub>NaO<sub>3</sub> [M+Na]<sup>+</sup>: calcd. 532.9087; found, 532.9084.

### 1.2.6 Synthesis of 1-(2,6-diiodo-4-methylphenyl)butan-2-ol (7f)

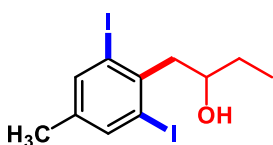

The title compound was prepared using the general procedure for Metal-Iodine Exchange reaction and isolated as colorless oil (**52%** yields).  $\delta_{\text{H}}$  (400MHz, *d*-CDCl<sub>3</sub>)  $\delta$ : 7.43(s, 2H), 3.92-3.97 (m, 1H), 3.19-3.27 (m, 2H), 2.21 (s, 3H), 1.62-1.69 (m, 2H), 1.45 (d, 1H, *J* = 5.7 Hz), 1.04 (t, 3H, *J* = 7.4 Hz).  $\delta_{\text{C}}$  (100 MHz, *d*-CDCl<sub>3</sub>)  $\delta$ : 141.1, 140.2, 140.1, 100.3, 73.6, 51.9, 30.6, 19.7, 10.3. **HRMS** (ESI) *m/z* for C<sub>11</sub>H<sub>14</sub>I<sub>2</sub>NaO [M+Na]<sup>+</sup>: calcd. 438.9032; found, 438.9023.

### 1.2.7 Synthesis of 1-(2,6-diiodo-4-methylphenyl)-3-methoxypropan-2-ol (7g)

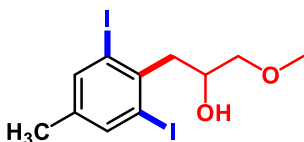

The title compound was prepared using the general procedure for Metal-Iodine Exchange reaction and isolated as white solid (**64%** yields).  $\delta_{\text{H}}$  (400MHz, *d*-CDCl<sub>3</sub>)  $\delta$ : 7.69 (s, 2H), 4.16-4.20 (m, 1H), 3.45-3.50 (m, 2H), 3.42 (s, 3H), 3.35 (dd, 1H, *J* = 8.0 Hz, *J* = 14.0 Hz), 3.18 (dd, 1H, *J* = 5.6 Hz, *J* = 14.0 Hz), 2.31 (d, 1H, *J* = 5.0 Hz), 2.21 (s, 3H).  $\delta_{\text{C}}$  (100 MHz, *d*-CDCl<sub>3</sub>)  $\delta$ : 141.2, 140.2, 139.6, 100.1, 76.2, 70.8, 59.3, 48.5, 19.7. **M.p.**: 93-95 °C. **HRMS** (ESI) *m/z* for C<sub>11</sub>H<sub>14</sub>I<sub>2</sub>NaO<sub>2</sub> [M+Na]<sup>+</sup>: calcd. 454.8981; found, 454.8977.

### 1.2.8 Synthesis of 1-(tert-butoxy)-3-(2,6-diiodo-4-methylphenyl)propan-2-ol (7h)

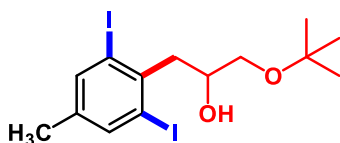

The title compound was prepared using the general procedure for Metal-Iodine Exchange reaction and isolated as colorless oil (**74%** yields).  $\delta_{\text{H}}$  (400MHz, *d*-CDCl<sub>3</sub>)  $\delta$ : 7.68 (s, 2H), 4.07-4.11

(m, 1H), 3.36-3.45 (m, 3H), 3.14 (dd, 1H,  $J = 6.0$  Hz,  $J = 13.9$  Hz), 2.48 (d, 1H,  $J = 4.8$  Hz), 2.21 (s, 3H), 1.21 (s, 9H).  $\delta_c$  (100 MHz,  $d$ -CDCl<sub>3</sub>)  $\delta$ : 141.1, 139.9, 139.9, 100.2, 73.4, 71.0, 65.5, 48.7, 27.8, 19.7. **HRMS** (ESI)  $m/z$  for C<sub>14</sub>H<sub>20</sub>I<sub>2</sub>NaO<sub>2</sub> [M+Na]<sup>+</sup>: calcd. 496.9450; found, 496.9442.

### 1.2.9 Synthesis of 2-(2,6-diiodo-4-methylphenyl)-1-phenylethan-1-ol (7i)

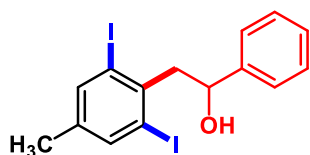

The title compound was prepared using the general procedure for Metal-Iodine Exchange reaction and isolated as colorless oil (**30%** yields).  $\delta_H$  (400MHz,  $d$ -CDCl<sub>3</sub>)  $\delta$ : 7.78 (bs, 2H), 7.26-7.38 (m, 5H),

5.30-5.36 (m, 1H), 3.31 (dd, 1H,  $J = 13.8$  Hz,  $J = 10.0$  Hz), 3.11 (dd, 1H,  $J = 4.7$  Hz,  $J = 13.8$  Hz), 2.45 (d, 1H,  $J = 6.6$ Hz), 2.24 (s, 3H).  $\delta_c$  (100 MHz,  $d$ -CDCl<sub>3</sub>)  $\delta$ : 140.9, 139.9, 137.6, 129.8, 129.2, 128.7, 127.6, 126.9, 81.9, 41.1, 19.7. **HRMS** (ESI)  $m/z$  for C<sub>15</sub>H<sub>14</sub>I<sub>2</sub>NaO [M+Na]<sup>+</sup>: calcd. 486.9032; found, 486.9027.

### 1.2.10 Synthesis of (S)-1-(benzyloxy)-3-(2,6-diiodo-4-methylphenyl)propan-2-ol (7j)

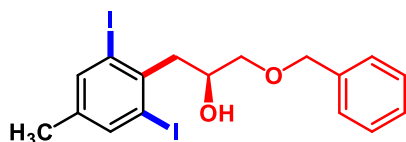

The title compound was prepared using the general procedure for Metal-Iodine Exchange reaction and isolated as colorless oil (**57%** yields).  $\delta_H$  (400MHz,  $d$ -CDCl<sub>3</sub>)  $\delta$ :

7.43(s, 2H), 7.26-7.37 (m, 5H), 4.60 (s, 2H), 4.20-4.25 (m, 1H), 3.40 (dd, 1H,  $J = 8.1$  Hz,  $J = 14.0$  Hz) 3.21 (dd, 1H,  $J = 5.8$  Hz,  $J = 14.0$  Hz), 2.36 (d, 1H,  $J = 5.2$ Hz), 2.22 (s, 3H).  $\delta_c$  (100 MHz,  $d$ -CDCl<sub>3</sub>)  $\delta$ : 141.1, 140.2, 139.6, 138.2, 128.6, 127.9, 100.1, 73.9, 73.6, 70.9, 48.6, 19.7. **HRMS** (ESI)  $m/z$  for C<sub>17</sub>H<sub>18</sub>I<sub>2</sub>NaO<sub>2</sub> [M+Na]<sup>+</sup>: calcd. 530.9294; found, 530.9289.



### 1.2.11 Synthesis of 1-(2,6-diiodo-4-methylphenyl)-3-(2-methoxyphenoxy)propan-2-ol (7k)

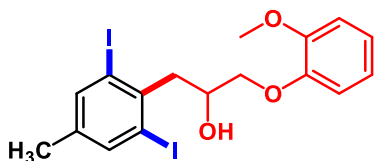

The title compound was prepared using the general procedure for Metal-Iodine Exchange reaction and isolated as white solid (**62%** yields).  $\delta_{\text{H}}$  (400MHz,  $d\text{-CDCl}_3$ )  $\delta$ : 7.70 (s, 2H), 6.88-6.95 (m, 4H), 4.38-4.45 (m, 1H), 4.10-4.12 (m, 2H), 3.86 (s, 3H), 3.49 (dd, 1H,  $J = 7.4$  Hz,  $J = 14.0$  Hz) 3.31 (dd, 1H,  $J = 6.6$  Hz,  $J = 14.0$  Hz), 2.88 (d, 1H,  $J = 4.4$  Hz), 2.22 (s, 3H).  $\delta_{\text{C}}$  (100 MHz,  $d\text{-CDCl}_3$ )  $\delta$ : 150.1, 148.5, 141.2, 140.3, 139.3, 122.3, 121.2, 115.4, 112.6, 100.2, 74.1, 70.5, 56.1, 48.5, 19.7. **M.p.**: 124-126 °C. **HRMS** (ESI)  $m/z$  for  $\text{C}_{17}\text{H}_{18}\text{I}_2\text{NaO}_3$   $[\text{M}+\text{Na}]^+$ : calcd. 546.9243; found, 546.9239.

### 1.2.12 Synthesis of 1-(4-bromophenoxy)-3-(2,6-diiodo-4-methylphenyl)propan-2-ol (7l)

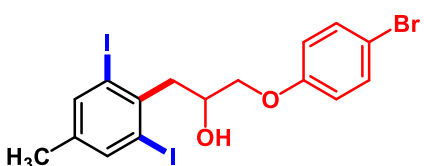

The title compound was prepared using the general procedure for Metal-Iodine Exchange reaction and isolated as white solid (**60%** yields).  $\delta_{\text{H}}$  (400MHz,  $d\text{-CDCl}_3$ )  $\delta$ : 7.71 (s, 2H), 7.37 (d, 2H,  $J = 8.8$  Hz), 6.81 (d, 2H,  $J = 8.8$  Hz), 4.40 (bs, 1H), 3.99-4.08 (m, 2H), 3.46 (dd, 1H,  $J = 7.6$  Hz,  $J = 14.0$  Hz), 3.34 (dd, 1H,  $J = 6.5$  Hz,  $J = 14.1$  Hz), 2.32 (d, 1H,  $J = 5.5$  Hz), 2.23 (s, 3H).  $\delta_{\text{C}}$  (100 MHz,  $d\text{-CDCl}_3$ )  $\delta$ : 157.8, 141.3, 140.5, 139.0, 132.5, 116.6, 113.5, 100.2, 71.7, 70.5, 48.6, 19.7. **M.p.**: 140-142 °C. **HRMS** (ESI)  $m/z$  for  $\text{C}_{16}\text{H}_{15}\text{BrI}_2\text{NaO}_2$   $[\text{M}+\text{Na}]^+$ : calcd. 594.8242; found, 594.8238.

### 1.2.13 Synthesis of 1-(4-fluoro-2,6-diiodophenyl)butan-2-ol (7m)

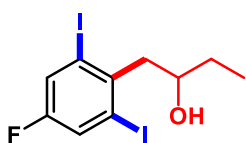

The title compound was prepared using the general procedure for Metal-Iodine Exchange reaction and isolated as colorless oil (**64%** yields).  $\delta_{\text{H}}$  (400MHz,  $d\text{-CDCl}_3$ )  $\delta$ : 7.62(d, 2H,  $J = 7.5$  Hz), 3.94 (bs, 1H),

3.22-3.32 (m, 2H), 1.64-1.69 (m, 2H), 1.46 (d, 1H,  $J = 6.0$  Hz), 1.04 (t, 3H,  $J = 7.4$  Hz).  $\delta_c$  (100 MHz,  $d\text{-CDCl}_3$ )  $\delta$ : 160.9, 158.4, 139.5, 139.5, 127.6, 127.4, 98.6, 98.6, 73.6, 51.3, 30.7, 10.3.

**HRMS** (ESI)  $m/z$  for  $C_{10}H_{11}F_2NaO$   $[M+Na]^+$ : calcd. 442.8781; found, 442.8778.

#### 1.2.14 Synthesis of (S)-1-(benzyloxy)-3-(4-fluoro-2,6-diiodophenyl)propan-2-ol (7n)

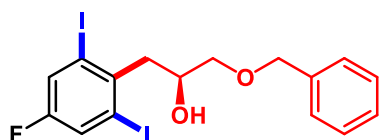

The title compound was prepared using the general procedure for Metal-Iodine Exchange reaction and isolated as colorless oil (**60%** yields).  $\delta_H$  (400MHz,  $d\text{-CDCl}_3$ )  $\delta$ : 7.62 (d, 2H,  $J = 7.6$  Hz), 7.29-7.36 (m, 5H), 4.61 (s, 2H), 4.10-4.23 (m, 1H), 3.59-3.61 (m, 2H), 3.42 (dd, 1H,  $J = 8.3$  Hz,  $J = 14.2$  Hz), 3.21 (dd, 1H,  $J = 5.5$  Hz,  $J = 14.2$  Hz), 2.40 (d, 1H,  $J = 4.4$  Hz).  $\delta_c$  (100 MHz,  $d\text{-CDCl}_3$ )  $\delta$ : 160.9, 158.4, 139.0, 138.9, 138.0, 128.6, 127.9, 127.9, 127.6, 127.4, 99.6, 99.5, 73.9, 73.6, 70.8, 48.0. **HRMS** (ESI)  $m/z$  for  $C_{16}H_{15}F_2NaO_2$   $[M+Na]^+$ : calcd. 534.9043; found, 534.9040.

#### 1.2.15 Synthesis of 1-(4-chloro-2,6-diiodophenyl)butan-2-ol (7o)

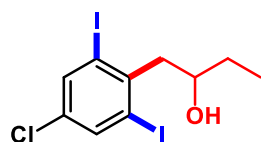

The title compound was prepared using the general procedure for Metal-Iodine Exchange reaction and isolated as colorless oil (**63%** yields).  $\delta_H$  (400MHz,  $d\text{-CDCl}_3$ )  $\delta$ : 7.86 (s, 2H), 3.93 (bs, 1H), 3.20-3.32 (m, 2H), 1.59-1.71 (m, 2H), 1.40 (d, 1H,  $J = 6.2$  Hz), 1.05 (t, 3H,  $J = 7.4$  Hz).  $\delta_c$  (100 MHz,  $d\text{-CDCl}_3$ )  $\delta$ : 142.2, 139.7, 133.3, 99.6, 73.5, 51.8, 30.8, 10.3. **HRMS** (ESI)  $m/z$  for  $C_{10}H_{11}ClI_2NaO$   $[M+Na]^+$ : calcd. 458.8485; found, 458.8477.

### 1.2.16 Synthesis of (S)-1-(benzyloxy)-3-(4-chloro-2,6-diiodophenyl)propan-2-ol (7p)

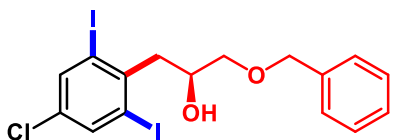

The title compound was prepared using the general procedure for Metal-Iodine Exchange reaction and isolated as white solid (**53%** yields).  $\delta_{\text{H}}$  (400MHz, *d*-CDCl<sub>3</sub>)  $\delta$ : 7.86

(s, 2H), 7.26-7.37 (m, 5H), 4.60 (s, 2H) 4.17-4.22 (m, 1H), 3.58-3.61 (m, 2H), 3.43 (dd, 1H,  $J = 8.3$  Hz,  $J = 14.0$  Hz), 3.21 (dd, 1H,  $J = 5.4$  Hz,  $J = 14.0$  Hz), 2.37 (d, 1H,  $J = 5.5$  Hz).  $\delta_{\text{C}}$  (100 MHz, *d*-CDCl<sub>3</sub>)  $\delta$ : 141.6, 139.7, 138.0, 133.4, 128.6, 127.9, 127.9, 99.6, 73.8, 73.6, 70.7, 48.4.

**M.p:** 79-81 °C. **HRMS** (ESI)  $m/z$  for C<sub>16</sub>H<sub>15</sub>ClI<sub>2</sub>NaO<sub>2</sub> [M+Na]<sup>+</sup>: calcd. 550.8748; found, 550.8741.

### 1.2.17 Synthesis of 1-(4-chloro-2,6-diiodophenyl)-3-(2-methoxyphenoxy) propan-2-ol (7q)

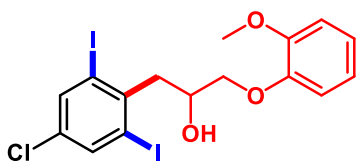

The title compound was prepared using the general procedure for Metal-Iodine Exchange reaction and isolated as white solid (**59%** yields).  $\delta_{\text{H}}$  (400MHz, *d*-CDCl<sub>3</sub>)  $\delta$ : 7.87 (s, 2H), 6.91-6.70

(m, 4H), 4.35-4.42 (m, 1H), 4.10 (d, 2H,  $J = 4.9$  Hz), 3.85 (s, 3H), 3.52 (dd, 1H,  $J = 6.1$  Hz,  $J = 14.0$  Hz), 3.31 (dd, 1H,  $J = 6.1$  Hz,  $J = 14.0$  Hz), 3.0 (d, 1H,  $J = 4.8$  Hz).  $\delta_{\text{C}}$  (100 MHz, *d*-CDCl<sub>3</sub>)

$\delta$ : 150.1, 148.4, 141.4, 139.7, 133.4, 122.5, 121.2, 115.6, 112.3, 74.1, 70.3, 56.0, 48.3. **M.p:** 134-136 °C. **HRMS** (ESI)  $m/z$  for C<sub>16</sub>H<sub>15</sub>ClI<sub>2</sub>NaO<sub>3</sub> [M+Na]<sup>+</sup>: calcd. 566.8697; found, 566.8689.

### 1.2.18 Synthesis of 1-(4-chloro-2,6-diiodophenyl)-3-(*o*-tolylloxy)propan-2-ol (7r)

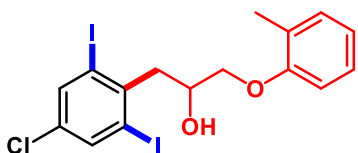

The title compound was prepared using the general procedure for Metal-Iodine Exchange reaction and isolated as white solid

(69% yields).  $\delta_{\text{H}}$  (400MHz,  $d\text{-CDCl}_3$ )  $\delta$ : 7.88 (s, 2H), 7.14-7.17 (m, 2H), 6.80-6.90 (m, 2H), 4.40 (bs, 1H), 4.10 (s, 2H), 3.63 (dd, 1H,  $J = 9.2$  Hz,  $J = 13.8$  Hz), 3.35 (dd, 1H,  $J = 9.6$  Hz,  $J = 13.7$  Hz), 2.35 (d, 1H,  $J = 6.20$  Hz), 2.29(s, 3H).  $\delta_{\text{C}}$  (100 MHz,  $d\text{-CDCl}_3$ )  $\delta$ : 156.6, 141.3, 139.8, 133.6, 130.9, 127.1, 126.8, 121.1, 111.1, 99.7, 71.2, 70.5, 48.5, 16.7, 16.7. **M.p.**: 114-116 °C. **HRMS** (ESI)  $m/z$  for  $\text{C}_{16}\text{H}_{15}\text{ClI}_2\text{NaO}_2$   $[\text{M}+\text{Na}]^+$ : calcd. 550.8748; found, 550.8739.

### 1.2.19 Synthesis of 1-(4-bromophenoxy)-3-(4-chloro-2,6-diiodophenyl)propan-2-ol (7s)

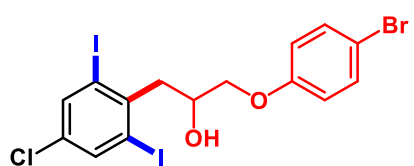

The title compound was prepared using the general procedure for Metal-Iodine Exchange reaction and isolated as white solid (51% yields).  $\delta_{\text{H}}$  (400MHz,  $d\text{-CDCl}_3$ )  $\delta$ : 7.88 (s, 2H), 7.38 (d, 2H,  $J = 8.9$  Hz), 6.80 (d, 2H,  $J = 8.9$  Hz), 4.34-4.40 (m, 1H), 4.02-4.04 (m, 2H), 3.52 (dd, 1H,  $J = 8.0$  Hz,  $J = 14.1$  Hz), 3.34 (dd, 1H,  $J = 5.9$  Hz,  $J = 14.0$  Hz), 2.33 (d, 1H,  $J = 5.8$  Hz).  $\delta_{\text{C}}$  (100 MHz,  $d\text{-CDCl}_3$ )  $\delta$ : 157.7, 141.0, 139.8, 133.7, 132.5, 116.5, 99.6, 71.6, 70.2, 48.4. **M.p.**: 130-132 °C. **HRMS** (ESI)  $m/z$  for  $\text{C}_{15}\text{H}_{12}\text{BrClI}_2\text{NaO}_2$   $[\text{M}+\text{Na}]^+$ : calcd. 614.7696; found, 614.7691.

### 1.2.20 Synthesis of 1-(4-bromo-2,6-diiodophenyl)butan-2-ol (7t)

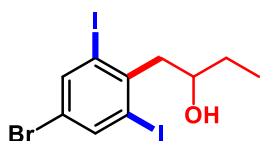

The title compound was prepared using the general procedure for Metal-Iodine Exchange reaction and isolated as colorless oil (63% yields).  $\delta_{\text{H}}$  (400MHz,  $d\text{-CDCl}_3$ )  $\delta$ : 8.00 (s, 2H), 3.90-3.98 (m, 1H), 3.18-3.30 (m, 2H), 1.63-1.71 (m, 2H), 1.40 (d, 1H,  $J = 8.0$ Hz), 1.04 (t, 3H,  $J = 7.4$  Hz).  $\delta_{\text{C}}$  (100 MHz,  $d\text{-CDCl}_3$ )  $\delta$ : 142.7, 142.3, 121.1, 100.3, 73.4, 51.9, 30.8, 10.3. **HRMS** (ESI)  $m/z$  for  $\text{C}_{10}\text{H}_{11}\text{BrI}_2\text{NaO}$   $[\text{M}+\text{Na}]^+$ : calcd. 502.7980; found, 502.7972.

### 1.2.21 Synthesis of (*S*)-1-(benzyloxy)-3-(4-bromo-2,6-diiodophenyl)propan-2-ol (7u)

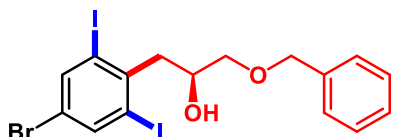

The title compound was prepared using the general procedure for Metal-Iodine Exchange reaction and isolated as white solid (**59%** yields).  $\delta_{\text{H}}$  (400MHz, *d*-CDCl<sub>3</sub>)  $\delta$ : 8.00

(s, 2H), 7.30-7.36 (m, 5H), 4.60 (s, 2H), 4.17-4.20 (m, 1H), 3.56-3.62 (m, 2H), 3.41 (dd, 1H,  $J = 8.4$  Hz,  $J = 14.0$  Hz), 3.18 (dd, 1H,  $J = 5.4$  Hz,  $J = 13.9$  Hz), 2.36 (d, 1H,  $J = 5.5$  Hz).  $\delta_{\text{C}}$  (100 MHz, *d*-CDCl<sub>3</sub>)  $\delta$ : 142.3, 142.1, 138.0, 128.6, 127.9, 127.9, 121.2, 100.2, 48.6. **M.p**: 84-86 °C.

**HRMS** (ESI)  $m/z$  for C<sub>16</sub>H<sub>15</sub>BrI<sub>2</sub>NaO<sub>2</sub> [M+Na]<sup>+</sup>: calcd. 594.8242; found, 594.8235.

### 1.2.22 Synthesis of 1-(2,6-diiodo-4-methoxyphenyl)butan-2-ol (7v)

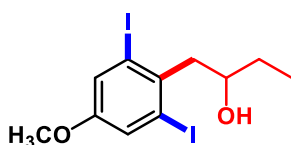

The title compound was prepared using the general procedure for Metal-Iodine Exchange reaction and isolated as colorless oil (**46 %** yields).  $\delta_{\text{H}}$  (400MHz, *d*-CDCl<sub>3</sub>)  $\delta$ : 7.43(s, 2H) 3.94-3.90 (m, 1H), 3.75

(s, 3H), 3.23-3.21 (m, 2H), 1.69-1.60 (m, 2H), 1.41 (bs, 1H), 1.04 (t, 3H,  $J = 7.4$  Hz).  $\delta_{\text{C}}$  (100 MHz, *d*-CDCl<sub>3</sub>)  $\delta$ : 158.3, 135.3, 126.3, 99.5, 73.7, 55.9, 51.3, 30.5, 10.3. **HRMS** (ESI)  $m/z$  for C<sub>11</sub>H<sub>14</sub>I<sub>2</sub>NaO<sub>2</sub> [M+Na]<sup>+</sup>: calcd. 454.8981; found, 454.8978.

### 1.2.23 Synthesis of 1-(2,6-diiodo-4-methoxyphenyl)-3-methoxypropan-2-ol (7w)

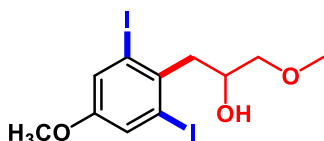

The title compound was prepared using the general procedure for Metal-Iodine Exchange reaction and isolated as white solid (**71 %** yields).  $\delta_{\text{H}}$  (400MHz, *d*-CDCl<sub>3</sub>)  $\delta$ : 7.42(s, 2H), 4.10 (bs, 1H),

3.74 (s, 3H), 3.47 (d, 2H,  $J = 4.4$  Hz), 3.41 (s, 3H), 3.35 (dd, 1H,  $J = 8.0$  Hz,  $J = 14.3$ Hz), 3.17

(dd, 1H,  $J = 5.9$  Hz,  $J = 14.2$ Hz), 2.31 (d, 1H,  $J = 4.8$  Hz).  $\delta_c$  (100 MHz,  $d$ -CDCl<sub>3</sub>)  $\delta$ : 158.4, 134.7, 126.3, 99.4, 76.2, 70.9, 59.3, 55.8, 47.9. **M.p.**: 104-106 °C. **HRMS** (ESI)  $m/z$  for C<sub>11</sub>H<sub>14</sub>I<sub>2</sub>NaO<sub>3</sub> [M+Na]<sup>+</sup>: calcd. 470.8930; found, 470.8927.

#### 1.2.24 Synthesis of 1-(tert-butoxy)-3-(2,6-diiodo-4-methoxyphenyl)propan-2-ol (7x)

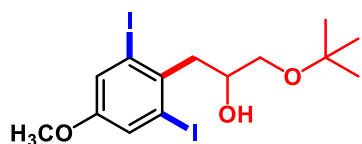

The title compound was prepared using the general procedure for Metal-Iodine Exchange reaction and isolated as colorless oil (**67%** yields).  $\delta_H$  (400MHz,  $d$ -CDCl<sub>3</sub>)  $\delta$ : 7.43(s, 2H), 4.00-4.10 (m, 1H), 3.74 (s, 3H), 3.42 (d, 2H,  $J = 5.3$  Hz), 3.34-3.40 (m, 1H), 3.12 (dd, 1H,  $J = 6.1$  Hz,  $J = 14.2$ Hz), 2.50 (d, 1H,  $J = 4.7$  Hz), 1.21 (s, 9H).  $\delta_c$  (100 MHz,  $d$ -CDCl<sub>3</sub>)  $\delta$ : 158.2, 134.9, 126.2, 99.4, 73.4, 71.1, 65.4, 55.8, 47.9, 27.7. **HRMS** (ESI)  $m/z$  for C<sub>14</sub>H<sub>20</sub>I<sub>2</sub>NaO<sub>3</sub> [M+Na]<sup>+</sup>: calcd. 512.9400; found, 512.9396.

#### 1.2.25 Synthesis of 2-(2,6-diiodo-4-methoxyphenyl)-1-phenylethan-1-ol (7y)

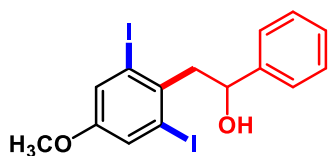

The title compound was prepared using the general procedure for Metal-Iodine Exchange reaction and isolated as colorless oil (**25 %** yields).  $\delta_H$  (400MHz,  $d$ -CDCl<sub>3</sub>)  $\delta$ : 7.50-7.35 (m, 6H), 7.31 (d, 1H,  $J = 7.3$ Hz), 5.13-5.10 (m, 1H), 3.77 (s, 3H), 3.38 (dd, 1H,  $J = 4.3$  Hz,  $J = 14.3$  Hz), 3.57 (dd, 1H,  $J = 9.6$  Hz,  $J = 14.3$  Hz) 1.90 (d, 1H,  $J = 4.4$  Hz).  $\delta_c$  (100 MHz,  $d$ -CDCl<sub>3</sub>)  $\delta$ : 158.5, 143.9, 134.5, 128.6, 127.9, 126.3, 125.9, 99.7, 74.3, 55.9, 53.5. **HRMS** (ESI)  $m/z$  for C<sub>15</sub>H<sub>14</sub>I<sub>2</sub>NaO<sub>2</sub> [M+Na]<sup>+</sup>: calcd. 502.8981; found, 502.8975.

### 1.2.26 Synthesis of (S)-1-(benzyloxy)-3-(2,6-diiodo-4-methoxyphenyl)propan-2-ol (7z)

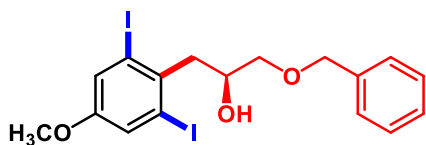

The title compound was prepared using the general procedure for Metal-Iodine Exchange reaction and isolated as colorless oil (**55%** yields).  $\delta_{\text{H}}$  (400MHz, *d*-CDCl<sub>3</sub>)  $\delta$ : 7.42(s, 2H), 7.36-7.26 (m, 5H), 4.63-4.57 (m, 2H), 4.22-4.18 (m, 1H), 3.74 (s, 3H), 3.60 (d, 2H, *J* = 4.9Hz), 3.38 (dd, 1H, *J* = 8.0 Hz, *J* = 14.2Hz), 3.20 (dd, 1H, *J* = 5.8 Hz, *J* = 14.2Hz), 2.36 (d, 1H, *J* = 4.0 Hz).  $\delta_{\text{C}}$  (100 MHz, *d*-CDCl<sub>3</sub>)  $\delta$ : 158.4, 138.2, 134.7, 128.6, 127.9, 126.3, 99.4, 73.9, 73.6, 71.1, 55.8, 47.9. **HRMS** (ESI) *m/z* for C<sub>17</sub>H<sub>18</sub>I<sub>2</sub>NaO<sub>3</sub> [M+Na]<sup>+</sup>: calcd. 546.9243; found, 546.9239.

### 1.2.27 Synthesis of 1-(2,6-diiodo-4-methoxyphenyl)-3-(2-methoxyphenoxy)propan-2-ol (7aa)

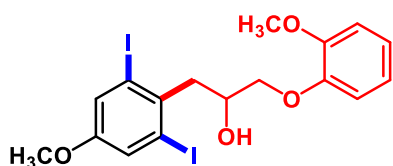

The title compound was prepared using the general procedure for Metal-Iodine Exchange reaction and isolated as white solid (**50%** yields).  $\delta_{\text{H}}$  (400MHz, *d*-CDCl<sub>3</sub>)  $\delta$ : 7.43(s, 2H), 6.80-6.98 (m, 4H), 4.38 (bs, 1H), 4.09-4.20 (m, 2H), 3.86 (s, 3H), 3.75 (s, 3H), 3.47 (dd, 1H, *J* = 7.4 Hz, *J* = 14.2Hz), 3.30 (dd, 1H, *J* = 6.7 Hz, *J* = 14.2Hz), 2.91 (d, 1H, *J* = 4.2 Hz).  $\delta_{\text{C}}$  (100 MHz, *d*-CDCl<sub>3</sub>)  $\delta$ : 158.5, 150.1, 148.5, 134.4, 126.4, 122.3, 121.2, 115.4, 112.3, 99.4, 74.1, 70.6, 56.1, 55.9, 47.9. **M.p.**: 105-107 °C. **HRMS** (ESI) *m/z* for C<sub>17</sub>H<sub>18</sub>I<sub>2</sub>NaO<sub>4</sub> [M+Na]<sup>+</sup>: calcd. 562.9192; found, 562.9189.

### 1.2.28 Synthesis of 1-(4-bromophenoxy)-3-(2,6-diiodo-4-methoxyphenyl) propan-2-ol (7ab)

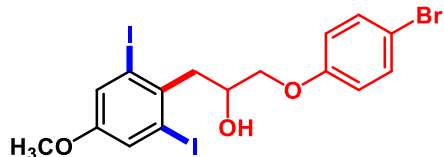

The title compound was prepared using the general procedure for Metal-Iodine Exchange reaction and isolated as white solid (**57%** yields).  $\delta_{\text{H}}$  (400MHz,  $d\text{-CDCl}_3$ )  $\delta$ : 7.44 (s, 2H), 7.37 (d, 2H,  $J = 8.8$  Hz), 6.80 (d, 2H,  $J = 8.9$  Hz), 4.34-4.40 (m, 1H), 3.98-4.06 (m, 2H), 3.75 (s, 3H), 3.46 (dd, 1H,  $J = 7.6$  Hz,  $J = 14.2$  Hz), 3.33 (dd, 1H,  $J = 6.5$  Hz,  $J = 14.2$  Hz), 2.33 (d, 1H,  $J = 4.0$ Hz).  $\delta_{\text{C}}$  (100 MHz,  $d\text{-CDCl}_3$ )  $\delta$ : 158.6, 157.8, 134.1, 132.5, 126.4, 116.6, 113.5, 99.4, 71.7, 70.6, 55.9, 47.9. **M.p.**: 135-137 °C. **HRMS** (ESI)  $m/z$  for  $\text{C}_{16}\text{H}_{15}\text{BrI}_2\text{NaO}_3$   $[\text{M}+\text{Na}]^+$ : calcd. 610.8192; found, 610.8188.

### 1.2.29 Synthesis of ethyl 3-(2,6-diiodo-4-methoxyphenyl)-2-hydroxypropanoate (7ac)

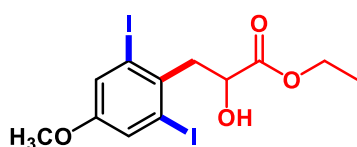

The title compound was prepared using the general procedure for Metal-Iodine Exchange reaction and isolated as colorless oil (**52%** yields).  $\delta_{\text{H}}$  (400MHz,  $d\text{-CDCl}_3$ )  $\delta$ : 7.43(s, 2H), 4.52 (dt, 1H,  $J = 7.3$  Hz,  $J = 7.0$  Hz), 4.25-4.28 (m, 2H), 3.75 (s, 3H), 3.40-3.48 (m, 2H), 2.77 (d, 1H,  $J = 7.4$  Hz), 1.25 (dd, 3H,  $J = 7.2$  Hz,  $J = 7.1$  Hz).  $\delta_{\text{C}}$  (100 MHz,  $d\text{-CDCl}_3$ )  $\delta$ : 174.4, 158.6, 133.3, 126.2, 99.5, 70.1, 62.3, 55.9, 49.3, 14.2. **HRMS** (ESI)  $m/z$  for  $\text{C}_{12}\text{H}_{14}\text{I}_2\text{NaO}_4$   $[\text{M}+\text{Na}]^+$ : calcd. 498.8879; found, 498.8875.

### 1.2.30 Synthesis of methyl 4-(2-hydroxybutyl)-3,5-diiodobenzoate (7ad)

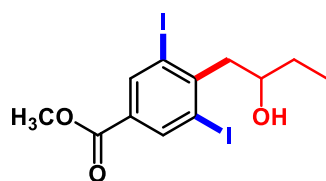

The title compound was prepared using the general procedure for Metal-Iodine Exchange reaction and isolated as white solid (**82%** yields).  $\delta_{\text{H}}$  (400MHz,  $d\text{-CDCl}_3$ )  $\delta$ : 8.49 (s, 2H), 3.69-4.03 (m,



1H), 3.90 (s, 3H), 3.27-3.40 (m, 2H), 1.65-1.73 (m, 2H), 1.40 (d, 1H,  $J = 6.5$  Hz), 1.05 (t, 3H,  $J = 7.4$  Hz).  $\delta_c$  (100 MHz,  $d$ -CDCl<sub>3</sub>)  $\delta$ : 164.1, 148.5, 141.3, 131.2, 99.9, 73.4, 52.7, 52.6, 30.9, 10.2. **M.p.**: 110-112 °C. **HRMS** (ESI)  $m/z$  for C<sub>12</sub>H<sub>14</sub>I<sub>2</sub>NaO<sub>3</sub> [M+Na]<sup>+</sup>: calcd. 482.8930; found, 482.8921.

### 1.2.31 Synthesis of 1-(2-chloro-6-iodophenyl)butan-2-ol (7ae)

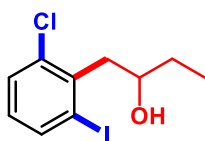

The title compound was prepared using the general procedure for Metal-Iodine Exchange reaction and isolated as colorless oil (**68%** yields).  $\delta_H$  (400MHz,  $d$ -CDCl<sub>3</sub>)  $\delta$ : 7.76 (d, 1H,  $J = 7.9$  Hz), 7.36 (d, 1H,  $J = 7.9$  Hz), 6.84 (t, 1H,  $J = 7.9$  Hz), 3.96 (bs, 1H), 3.13-3.23 (m, 2H), 1.61-1.70 (m, 2H), 1.47 (d, 1H,  $J = 4.0$  Hz), 1.04 (t, 3H,  $J = 7.4$  Hz).  $\delta_c$  (100 MHz,  $d$ -CDCl<sub>3</sub>)  $\delta$ : 139.6, 138.8, 134.5, 130.2, 129.2, 102.5, 73.2, 45.8, 30.7, 10.2. **HRMS** (ESI)  $m/z$  for C<sub>10</sub>H<sub>12</sub>ClINaO [M+Na]<sup>+</sup>: calcd. 332.9519; found, 332.9514.

### 1.2.32 Synthesis of 1-(2-bromo-6-iodophenyl)butan-2-ol (7af)

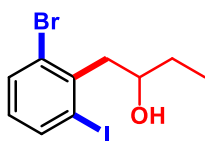

The title compound was prepared using the general procedure for Metal-Iodine Exchange reaction and isolated as colorless oil (**77%** yields).  $\delta_H$  (400MHz,  $d$ -CDCl<sub>3</sub>)  $\delta$ : 7.81 (d, 1H,  $J = 7.9$  Hz), 7.55 (d, 1H,  $J = 7.9$  Hz), 6.75 (t, 1H,  $J = 7.9$  Hz), 3.96-4.01 (m, 1H), 3.18-3.29 (m, 2H), 1.61-1.71 (m, 2H), 1.47 (d, 1H,  $J = 5.9$  Hz), 1.04 (t, 3H,  $J = 7.4$  Hz).  $\delta_c$  (100 MHz,  $d$ -CDCl<sub>3</sub>)  $\delta$ : 140.9, 139.5, 133.6, 129.5, 124.7, 102.2, 73.3, 48.2, 30.7, 10.3. **HRMS** (ESI)  $m/z$  for C<sub>10</sub>H<sub>12</sub>BrINaO [M+H]<sup>+</sup>: calcd. 376.9014; found, 376.9010.

## 1.3 NMR Spectra for New Compounds

### 1.3.1 <sup>1</sup>H-NMR of 1-(2,6-diiodophenyl)butan-2-ol (7a) in d-CDCl<sub>3</sub> at 25 °C.

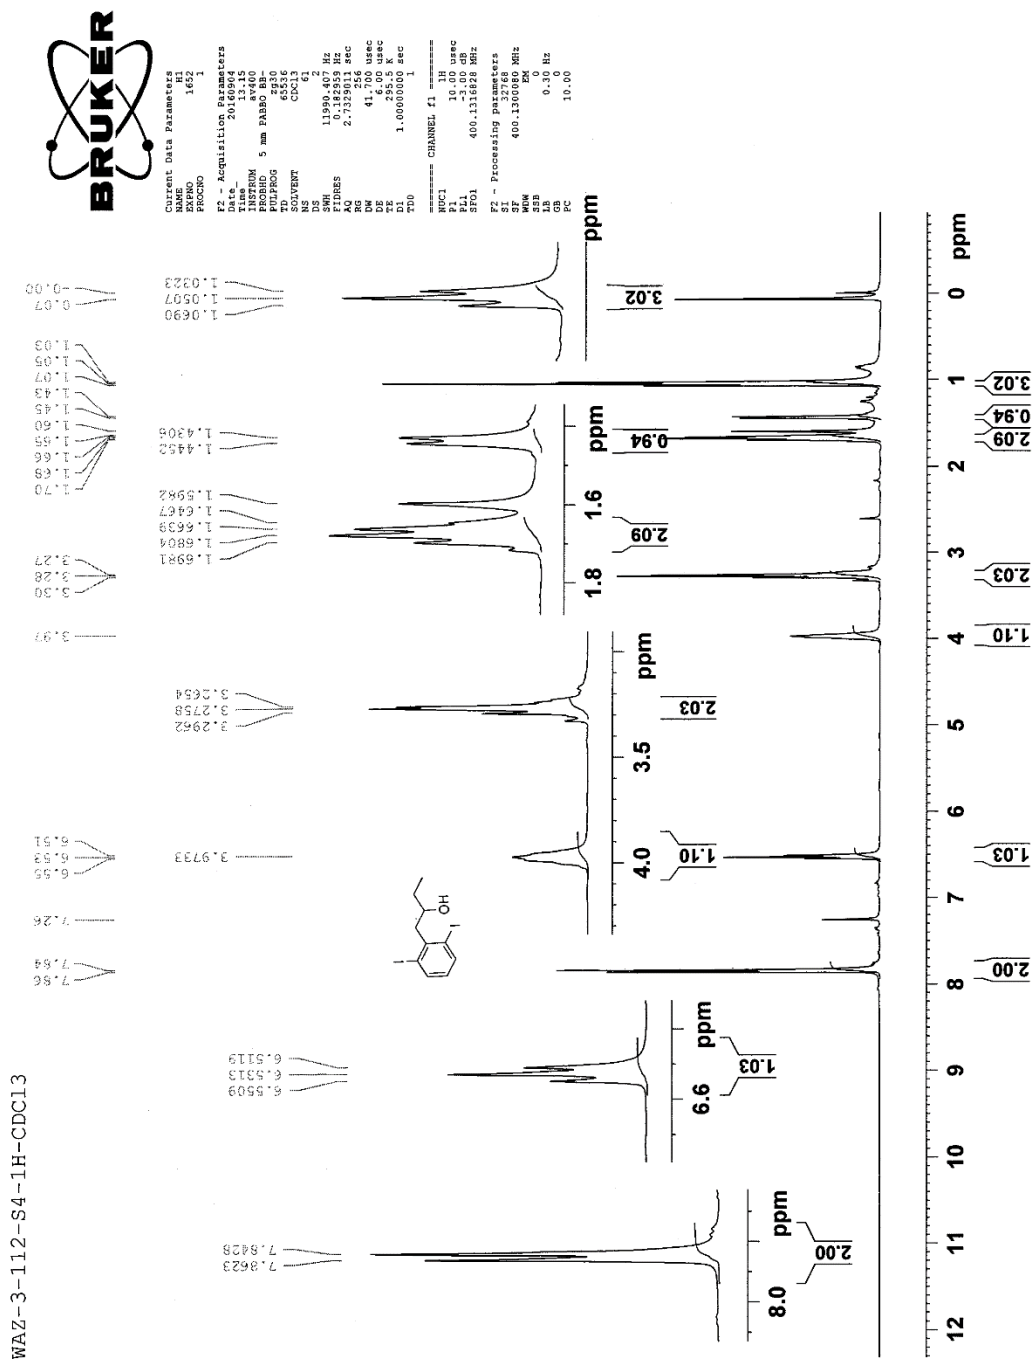

1.3.2  $^{13}\text{C}$ -NMR of 1-(2,6-diiodophenyl)butan-2-ol (7a) in  $d\text{-CDCl}_3$  at 25 °C.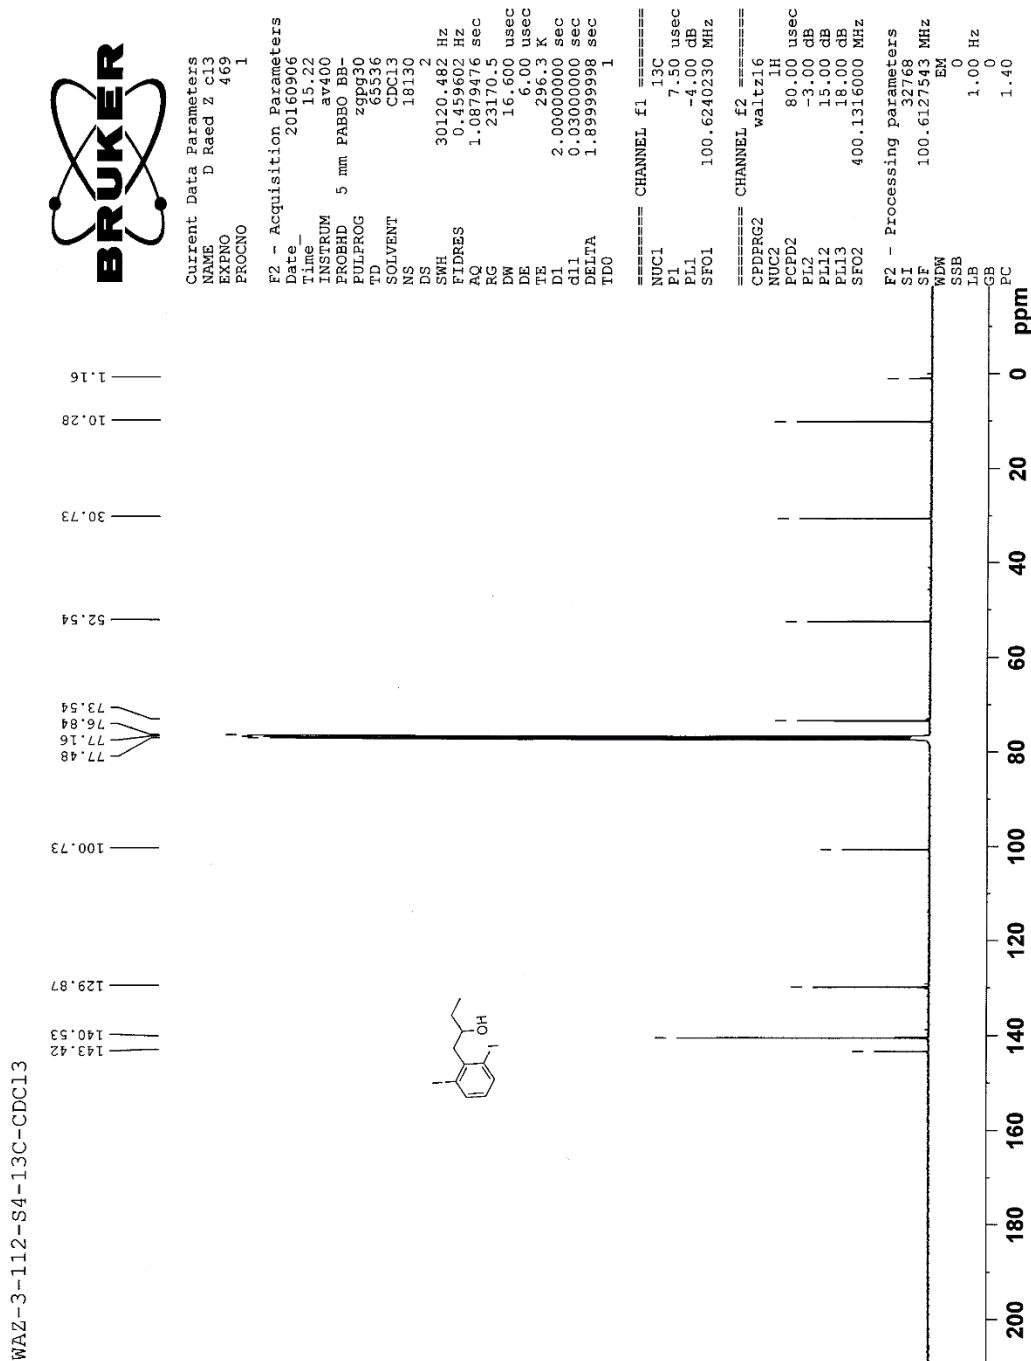

1.3.3 <sup>1</sup>H-NMR of (S)-1-(benzyloxy)-3-(2,6-diiodophenyl)propan-2-ol (7b) in d-CDCl<sub>3</sub> at 25 °C.

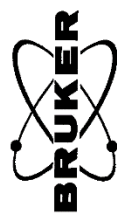

```

Current Data Parameters
EXPNO 1
PROCNO 1
F2 - Acquisition Parameters
Date_ 20160906
Time 11.05
INSTRUM 1H
PROBHD 5 mm PABBO BH
PULPROG zgpg30
TD 65536
SOLVENT CDCl3
DS 12
SWH 11390.467 Hz
FIDRES 2.7328011 sec
AQ 1.756 usec
RG 41
WDW EM
SSB 0
DE 5.90 usec
TE 300.2 K
D3 1.0000000 sec
TD0 1
===== CHANNEL f1 =====
NUC1 1H
P1 13.00 usec
PL1 0.00 dB
SFO1 400.1318628 MHz
F2 - Processing parameters
SI 32768
SF 400.1300000 MHz
WDW EM
SSB 0
GB 0
PC 10.00
    
```

WAZ-3-113-1H-CDCl3

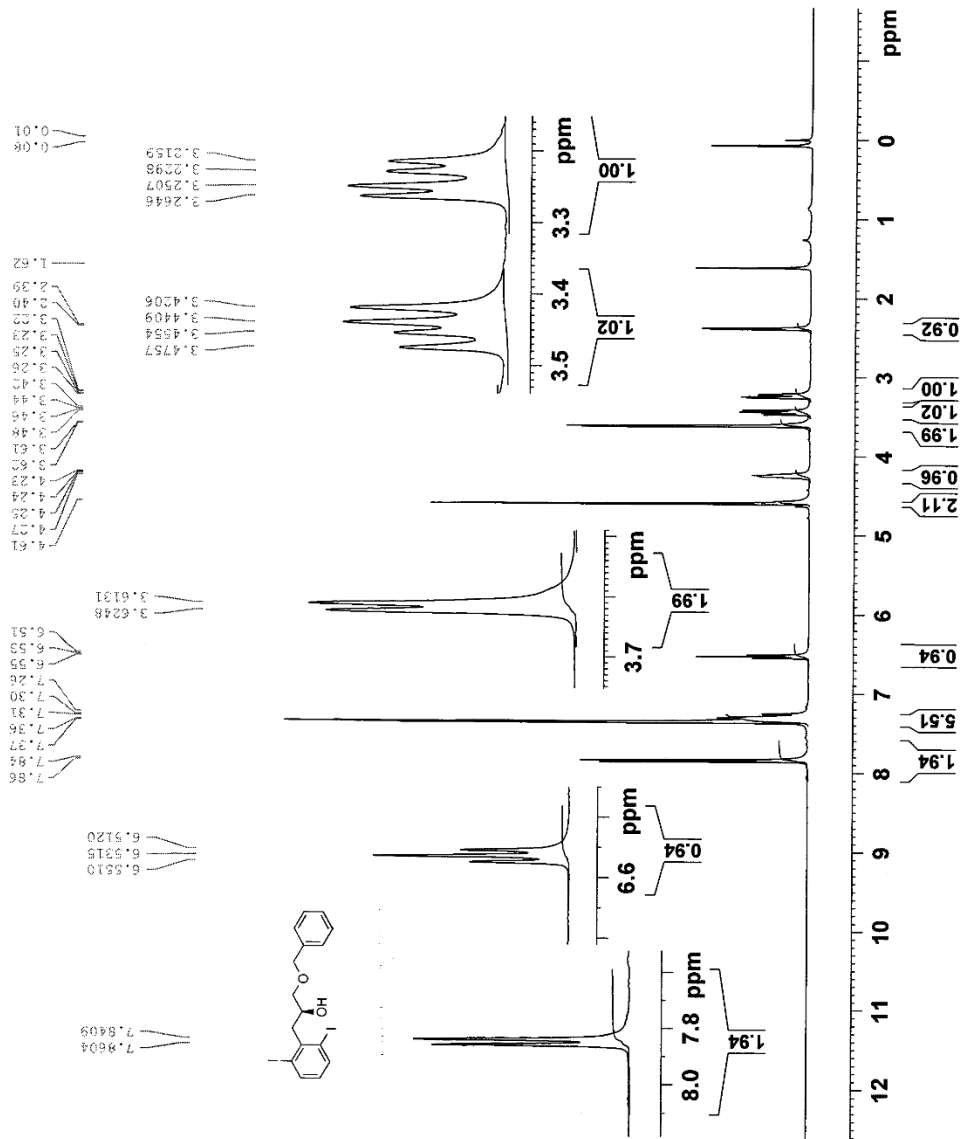

### 1.3.4 <sup>13</sup>C-NMR of (S)-1-(benzyloxy)-3-(2,6-diodophenyl)propan-2-ol (7b) in d-CDCl<sub>3</sub> at 25 °C.

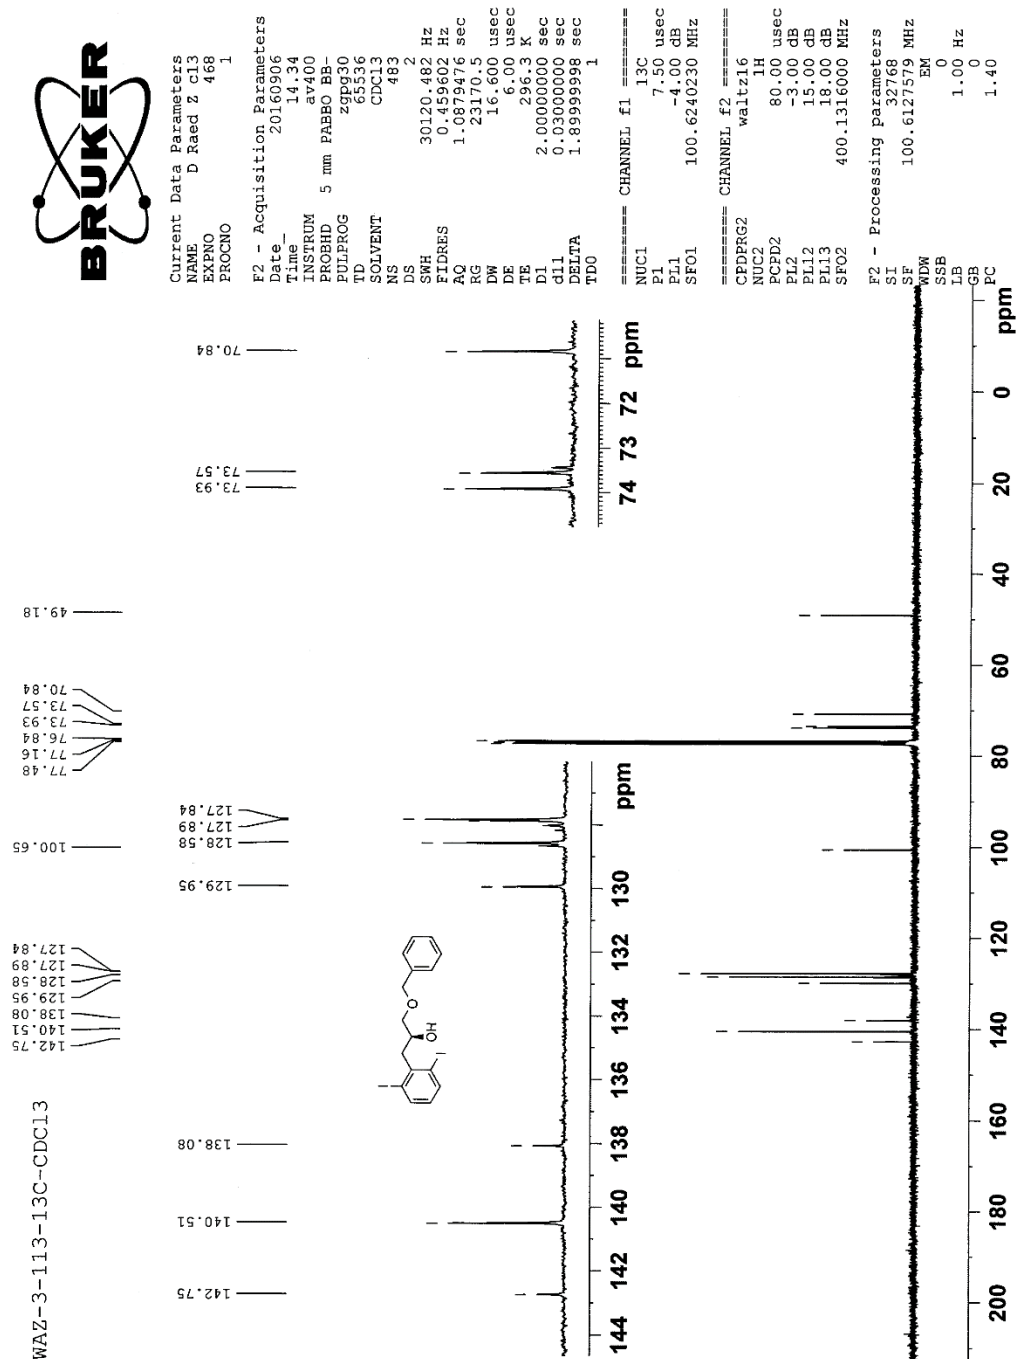

1.3.5 <sup>1</sup>H-NMR of 1-(4-bromophenoxy)-3-(2,6-diiodophenyl)propan-2-ol (7c) in d-CDCl<sub>3</sub> at 25 °C.

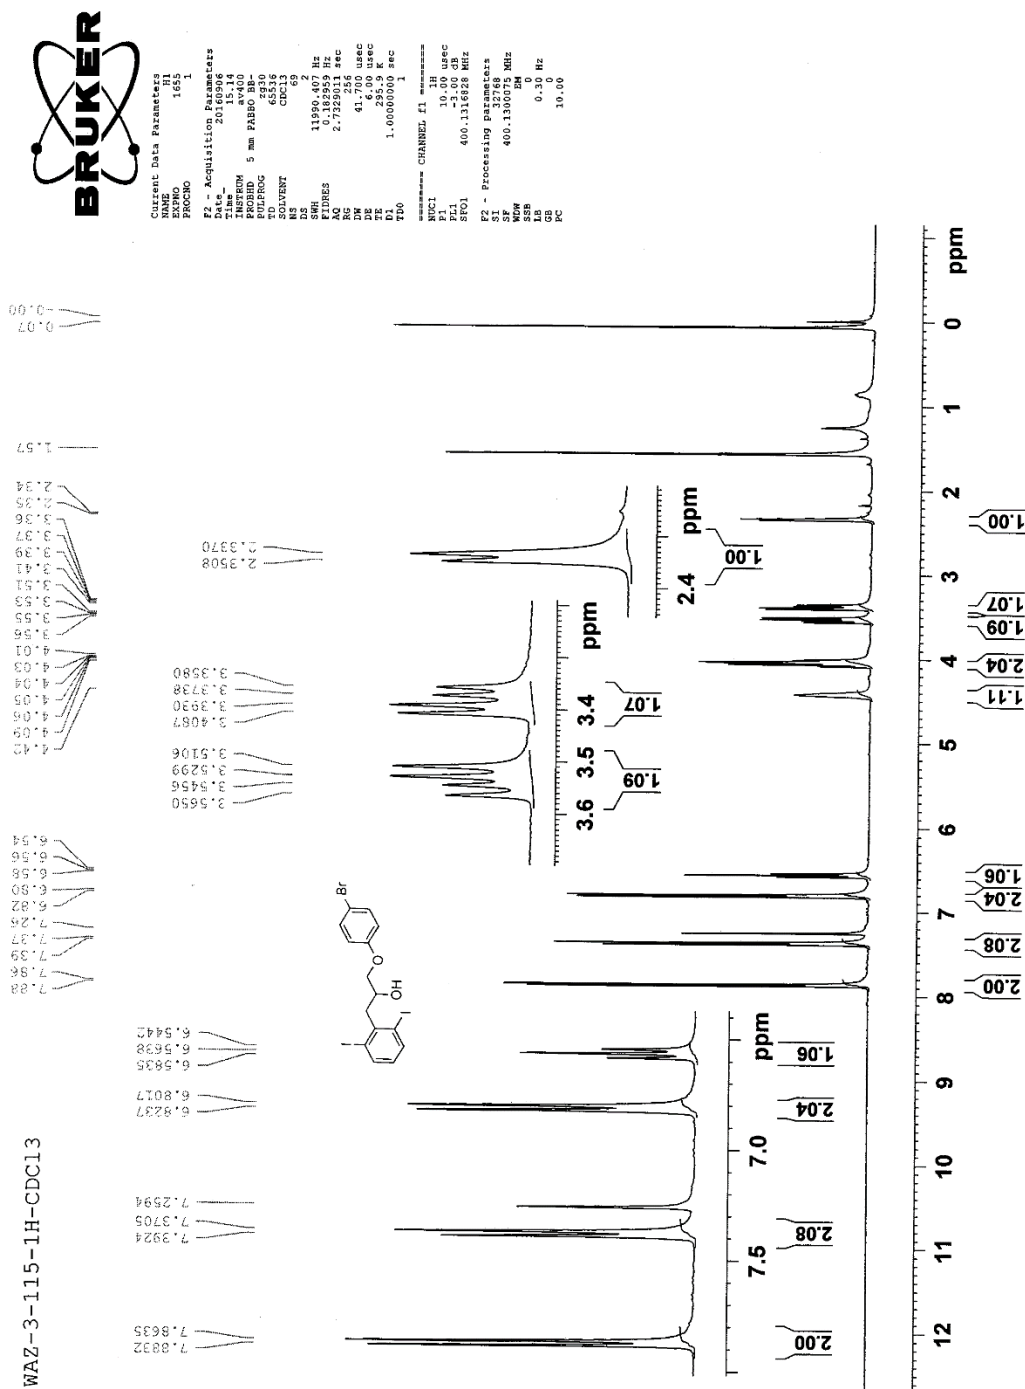

### 1.3.6 $^{13}\text{C}$ -NMR of 1-(4-bromophenoxy)-3-(2,6-diiodophenyl)propan-2-ol (7c) in $d\text{-CDCl}_3$ at 25 °C.

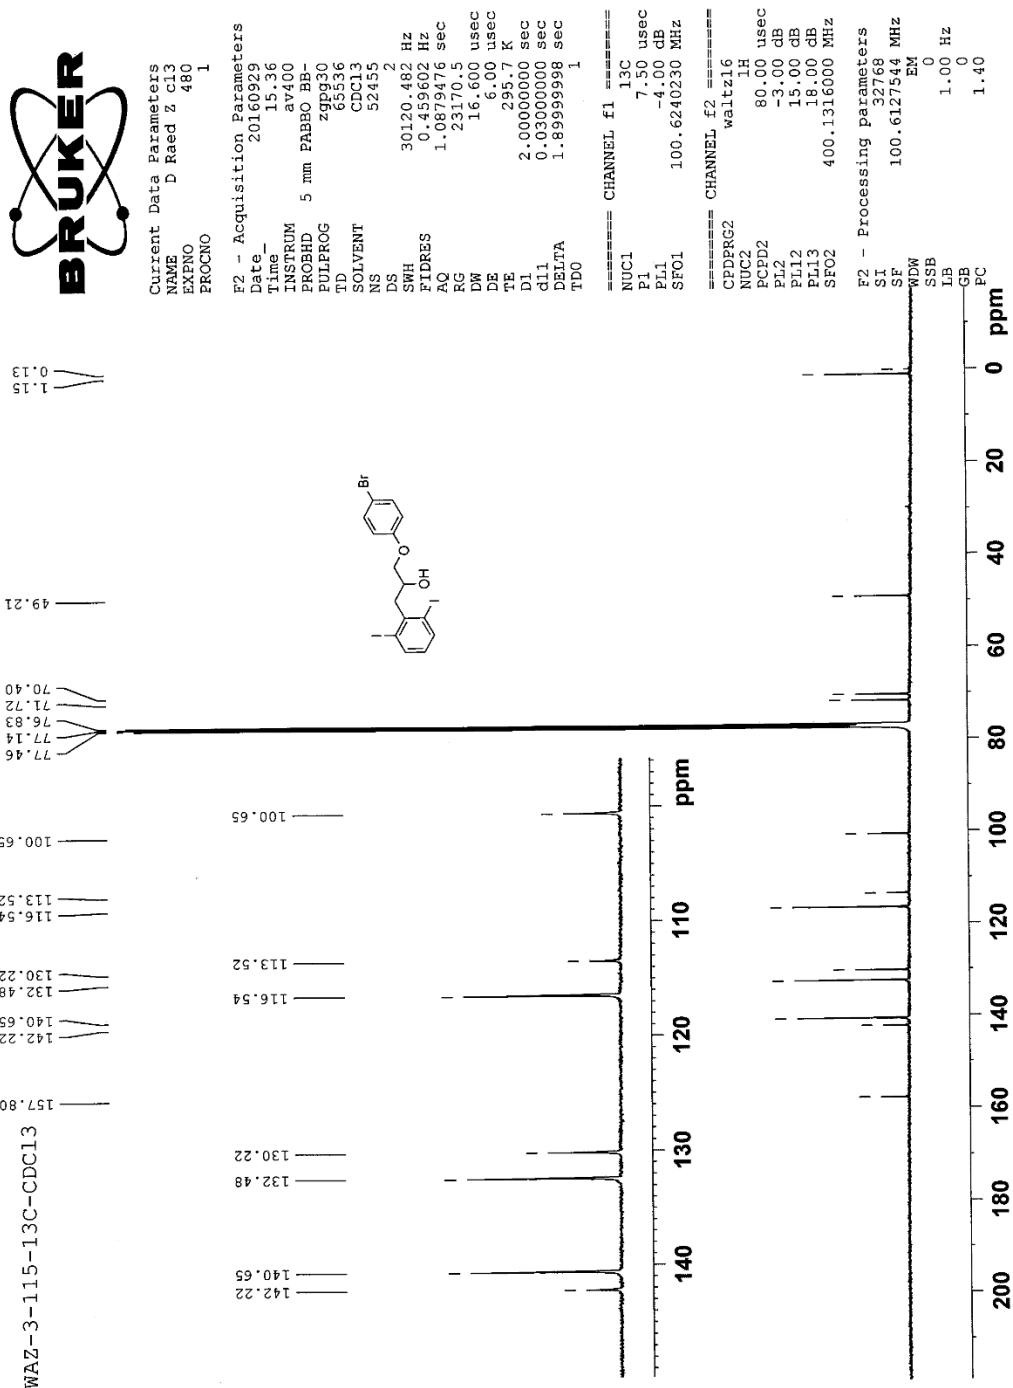

1.3.7 <sup>1</sup>H-NMR of 1-(tert-butoxy)-3-(2,6-diiodophenyl)propan-2-ol (7d) in d-CDCl<sub>3</sub> at 25 °C.

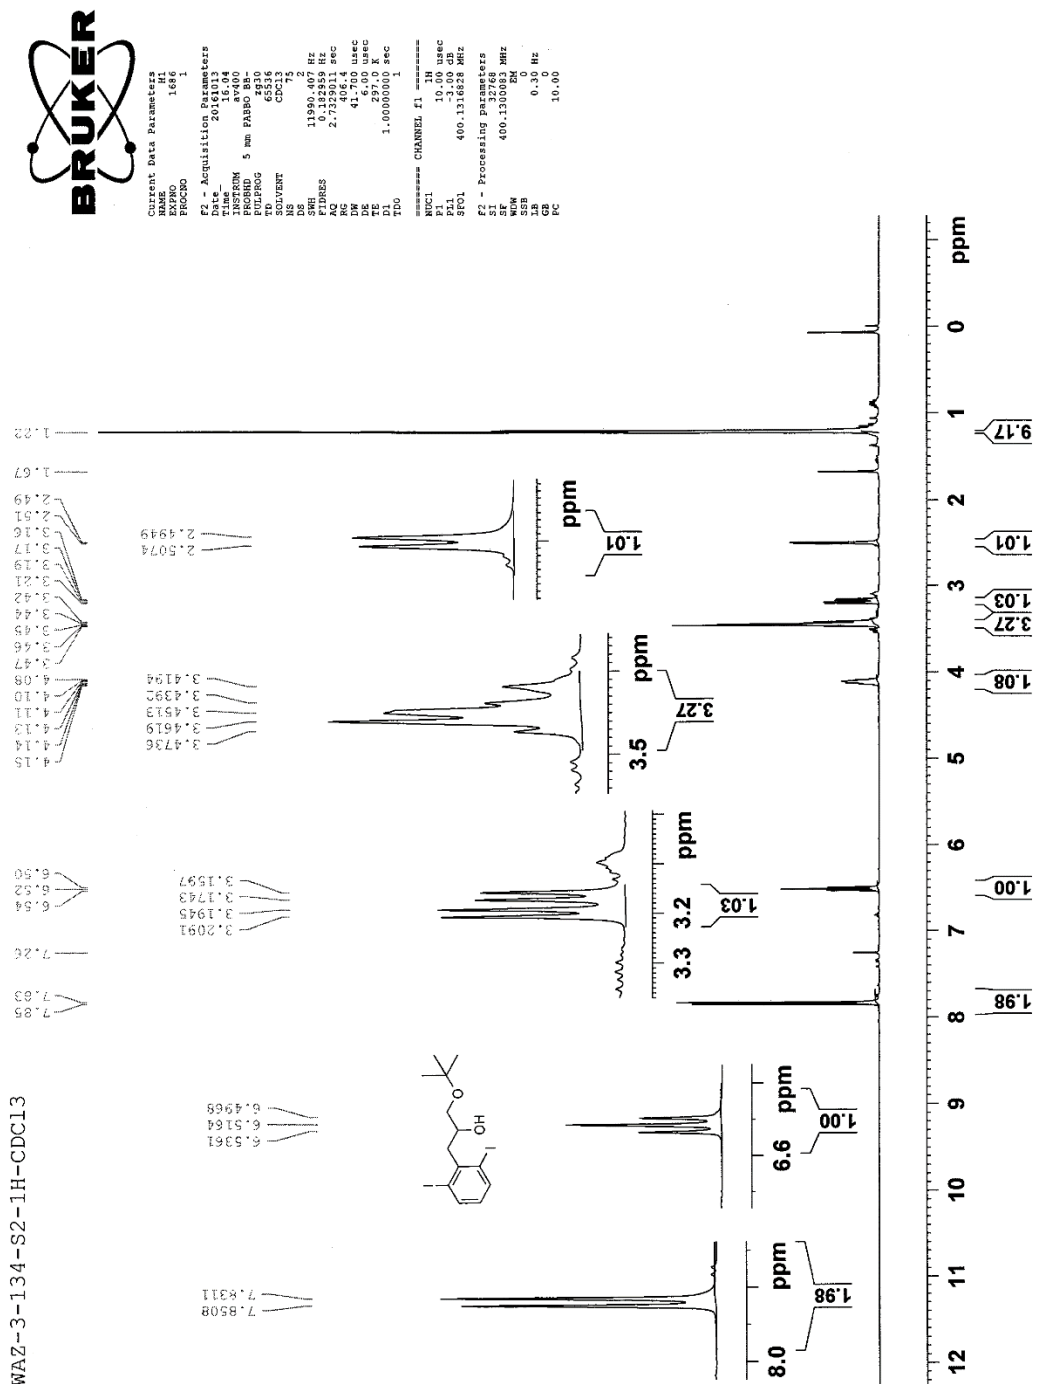



### 1.3.8 $^{13}\text{C}$ -NMR of 1-(tert-butoxy)-3-(2,6-diiodophenyl)propan-2-ol (7d) in $d\text{-CDCl}_3$ at 25 $^\circ\text{C}$ .

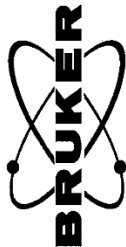

Current Data Parameters  
 NAME D Raed Z c13  
 EXPNO 493  
 PROCNO 1

F2 - Acquisition Parameters  
 Date\_ 20161020  
 Time\_ 8.14  
 INSTRUM av400  
 PROBHD 5 mm PABBO BB-  
 PULPROG zgpg30  
 TD 65536  
 SOLVENT CDCl3  
 NS 8975  
 DS 2  
 SWH 30120.482 Hz  
 FIDRES 0.459602 Hz  
 AQ 1.0879476 sec  
 RG 23170.5  
 DW 16.600 usec  
 DE 6.00 usec  
 TE 297.2 K  
 D1 2.00000000 sec  
 d11 0.03000000 sec  
 DELTA 1.8999998 sec  
 TDO 1

==== CHANNEL f1 =====  
 NUC1 13C  
 P1 7.50 usec  
 PL1 -4.00 dB  
 SF01 100.6240230 MHz

==== CHANNEL f2 =====  
 CPDPRG2 waitz16  
 NUC2 1H  
 P2 90.00 usec  
 PL2 -3.00 dB  
 PL12 15.00 dB  
 PL13 18.00 dB  
 SFO2 400.1316000 MHz

F2 - Processing parameters  
 SI 32768  
 SF 100.6122772 MHz  
 WDW EM  
 SSB 0  
 LB 1.00 Hz  
 GB 0  
 PC 1.40

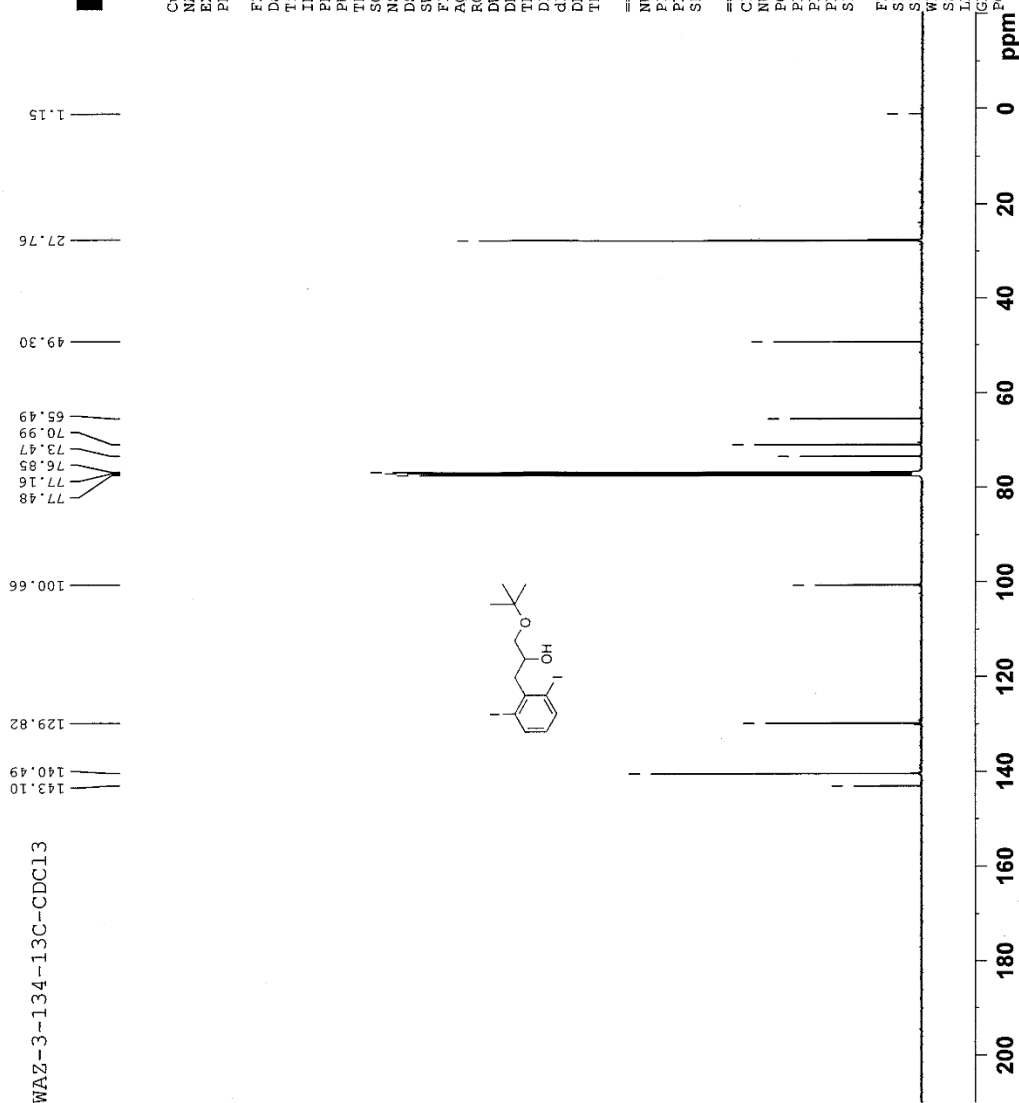

1.3.9 <sup>1</sup>H-NMR of 1-(2,6-diiodophenyl)-3-(2-methoxyphenoxy)propan-2-ol (7e) in d-CDCl<sub>3</sub> at 25 °C.

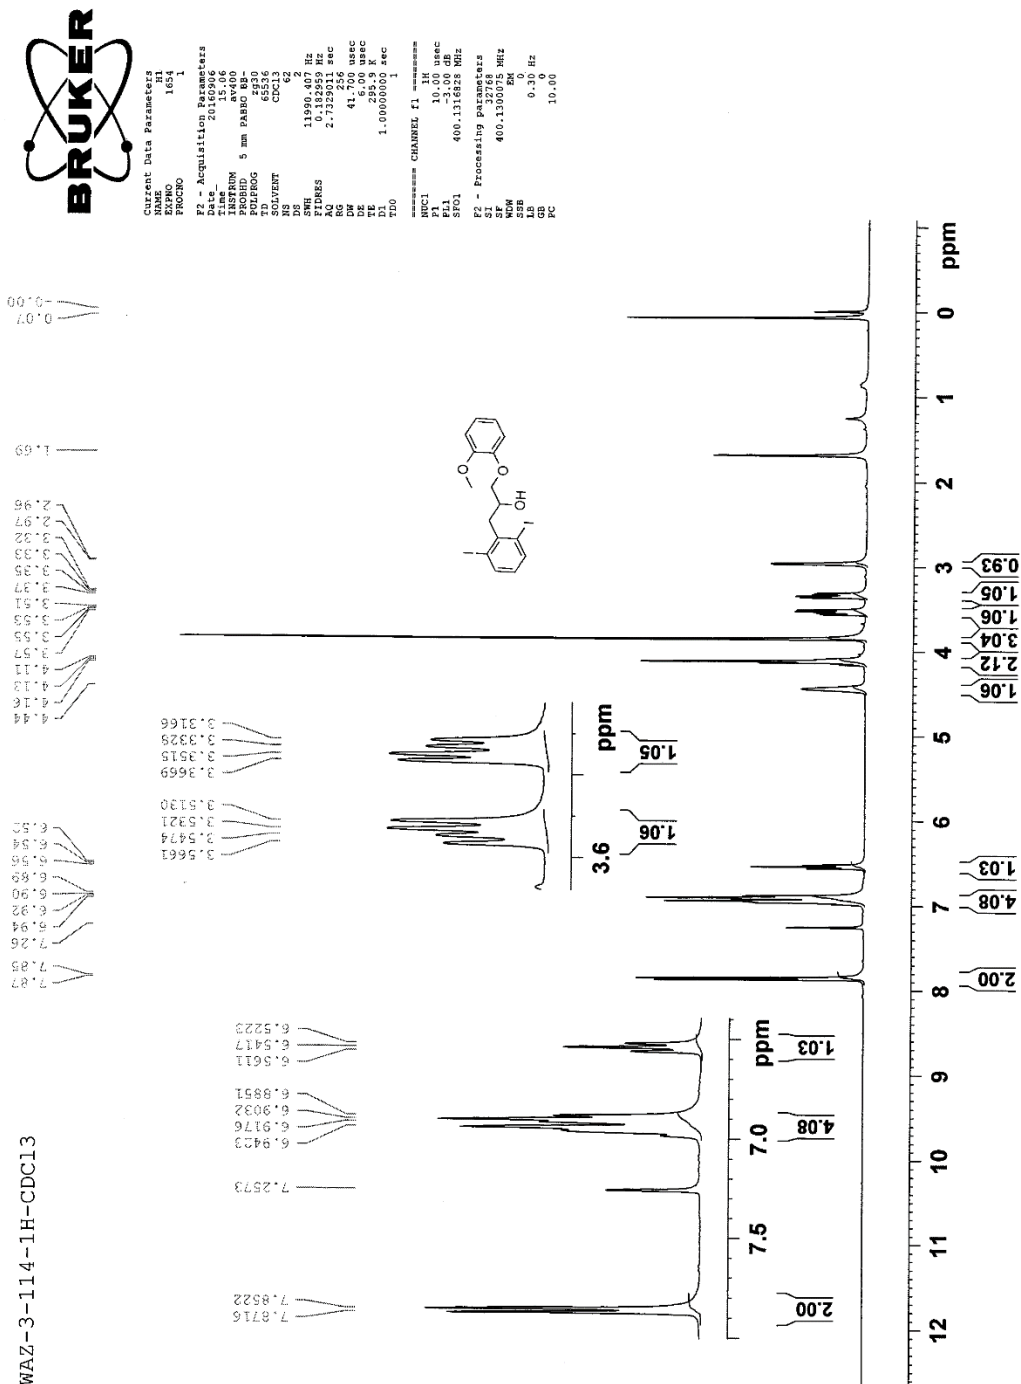

### 1.3.10 $^{13}\text{C}$ -NMR of 1-(2,6-diiodophenyl)-3-(2-methoxyphenoxy)propan-2-ol (7e) in $d\text{-CDCl}_3$ at 25 °C.

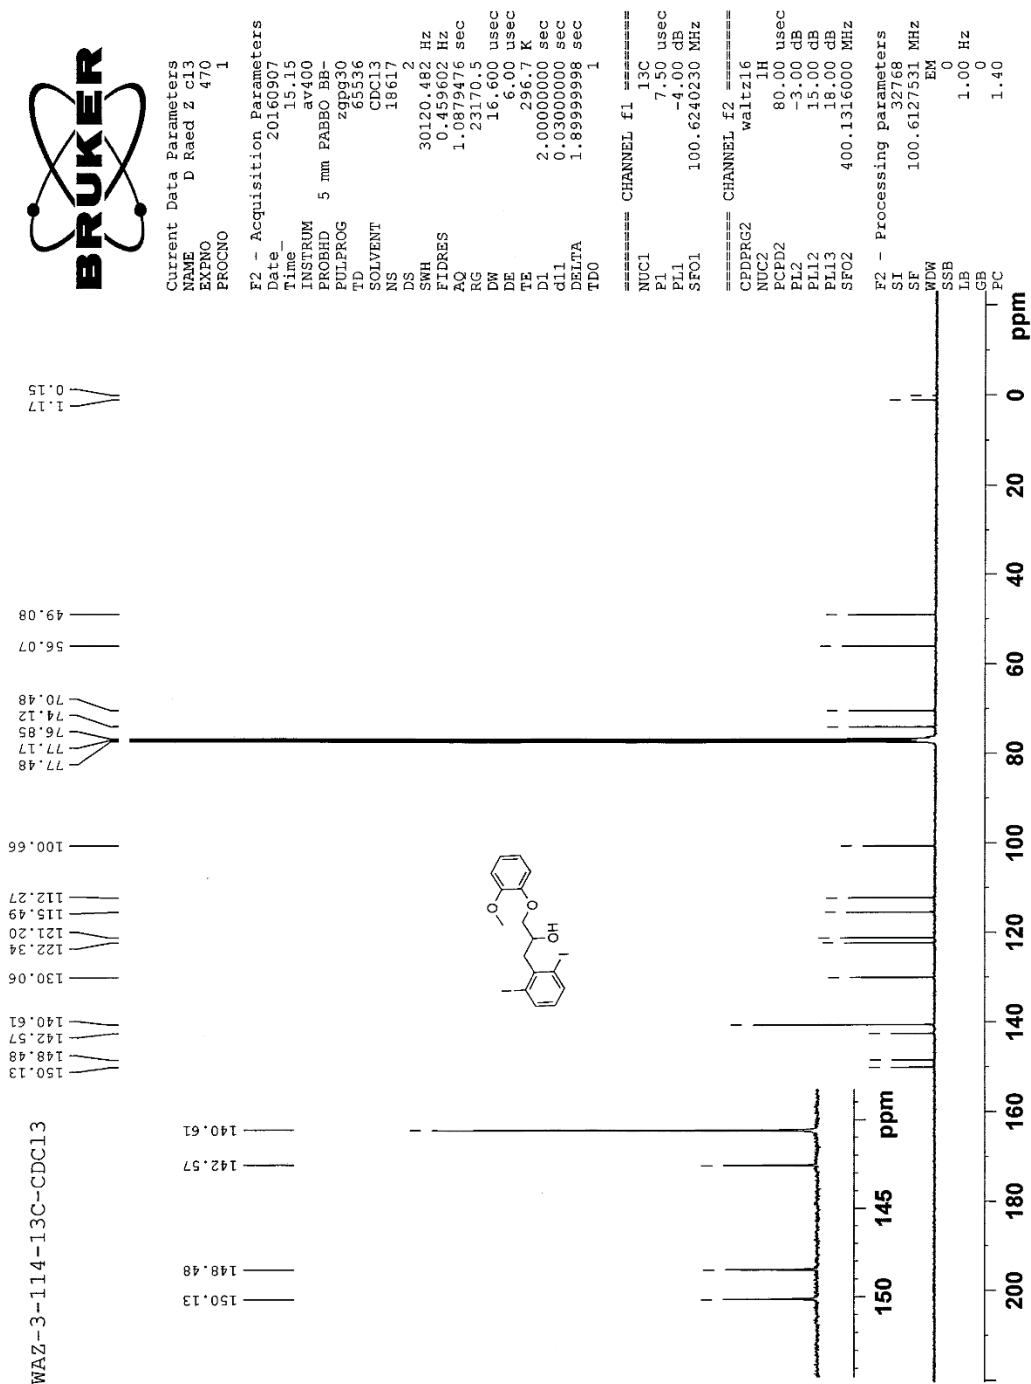

### 1.3.11 <sup>1</sup>H-NMR of 1-(2,6-diiodo-4-methylphenyl)butan-2-ol (7f) in d-CDCl<sub>3</sub> at 25 °C.

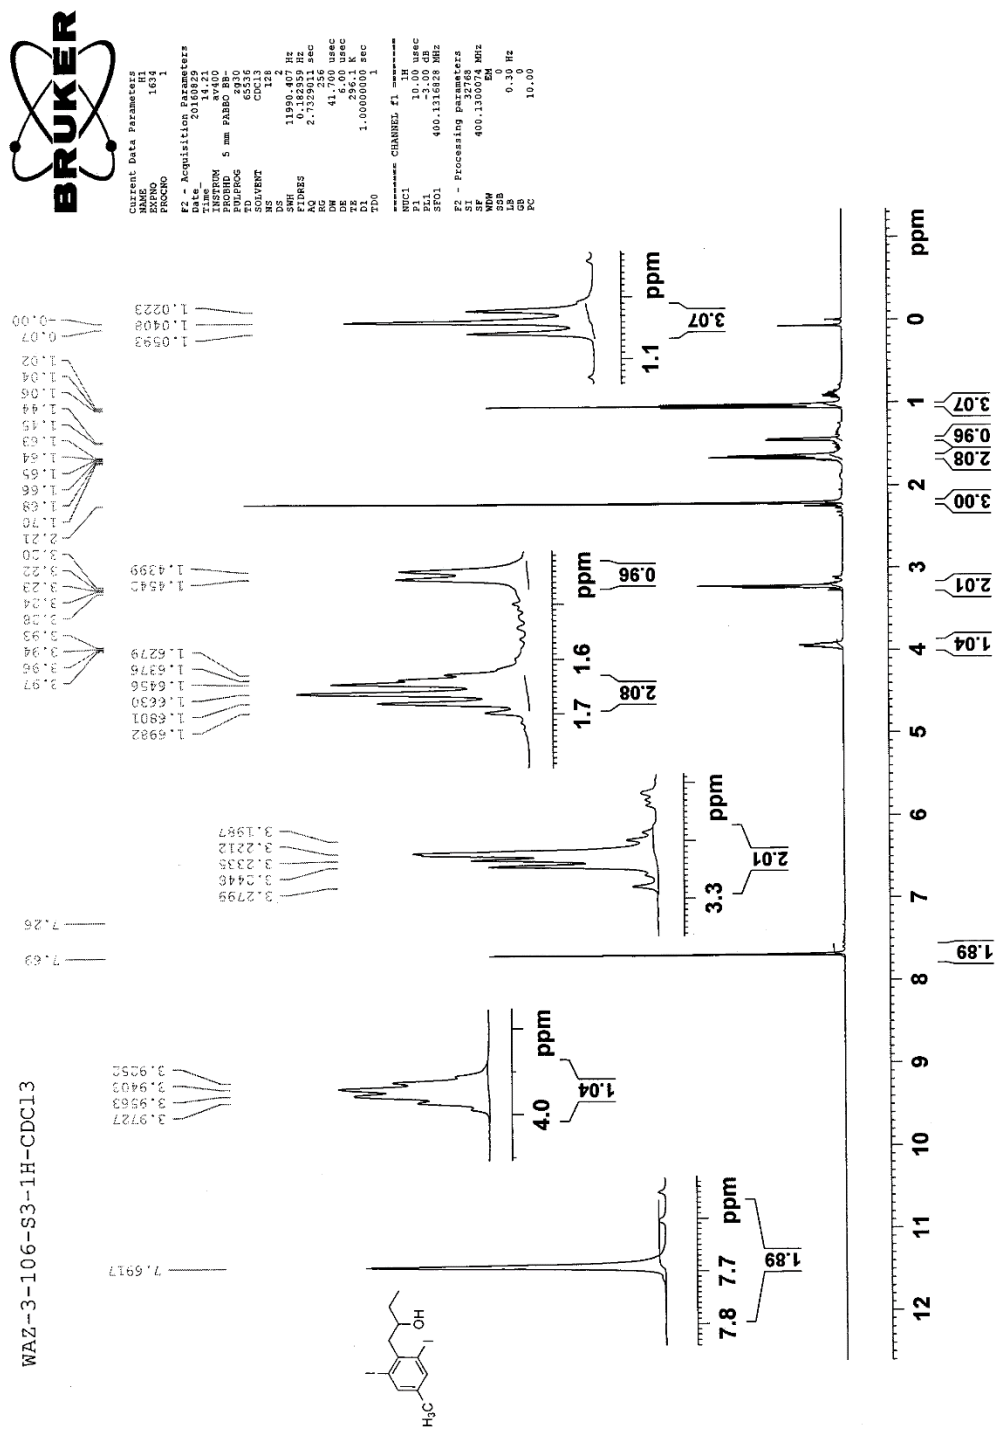

### 1.3.12 $^{13}\text{C}$ -NMR of 1-(2,6-diiodo-4-methylphenyl)butan-2-ol (7f) in $d\text{-CDCl}_3$ at 25 $^{\circ}\text{C}$ .

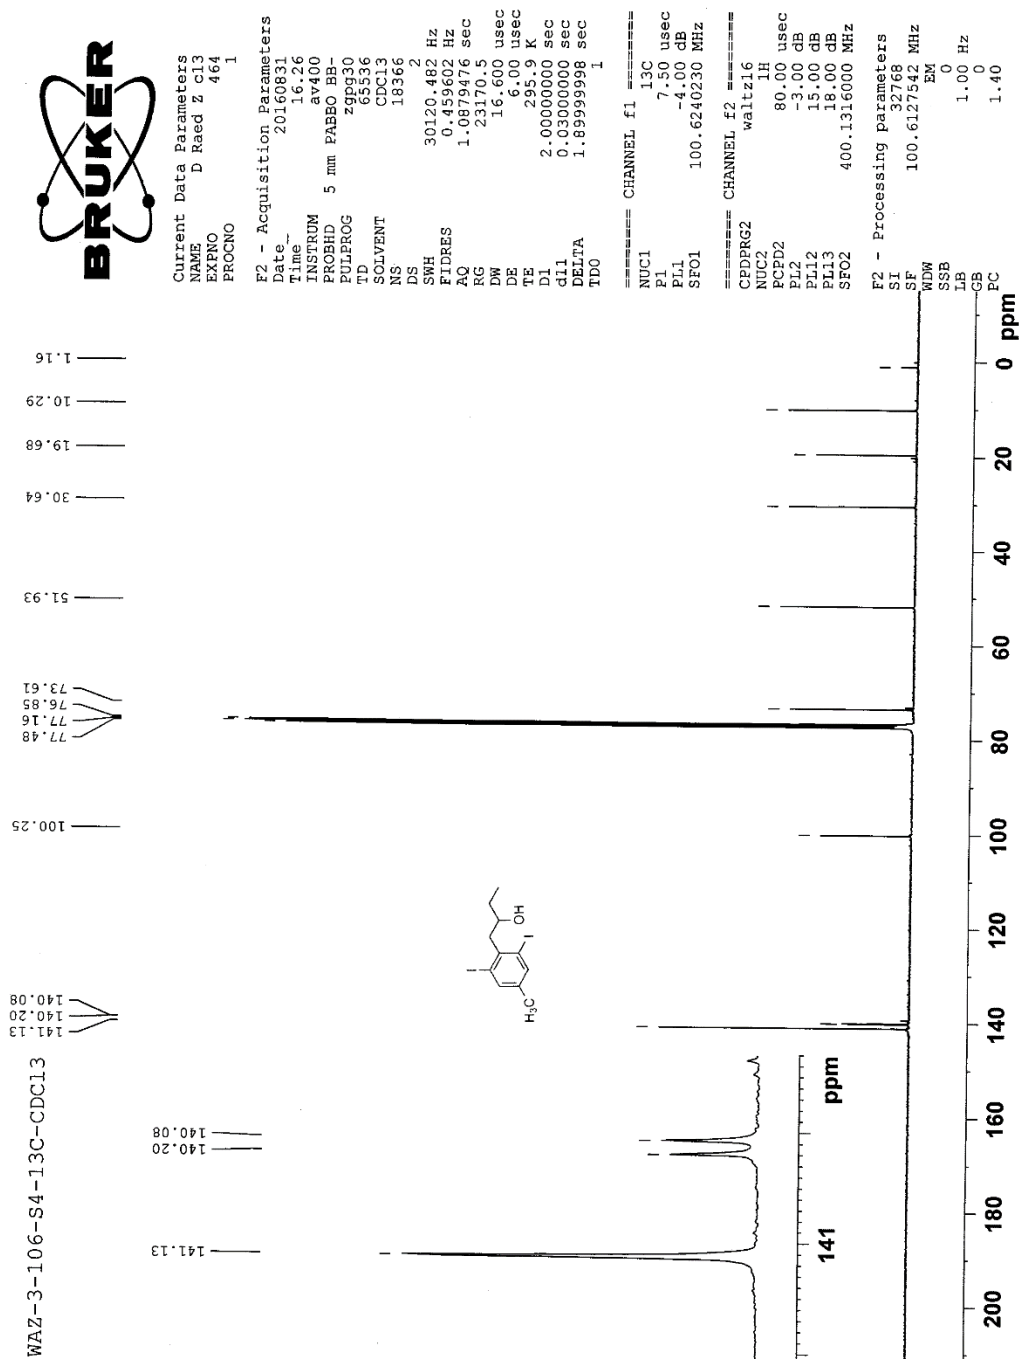

1.3.13 <sup>1</sup>H-NMR of 1-(2,6-diiodo-4-methylphenyl)-3-methoxypropan-2-ol (7g) in d-CDCl<sub>3</sub> at 25 °C.

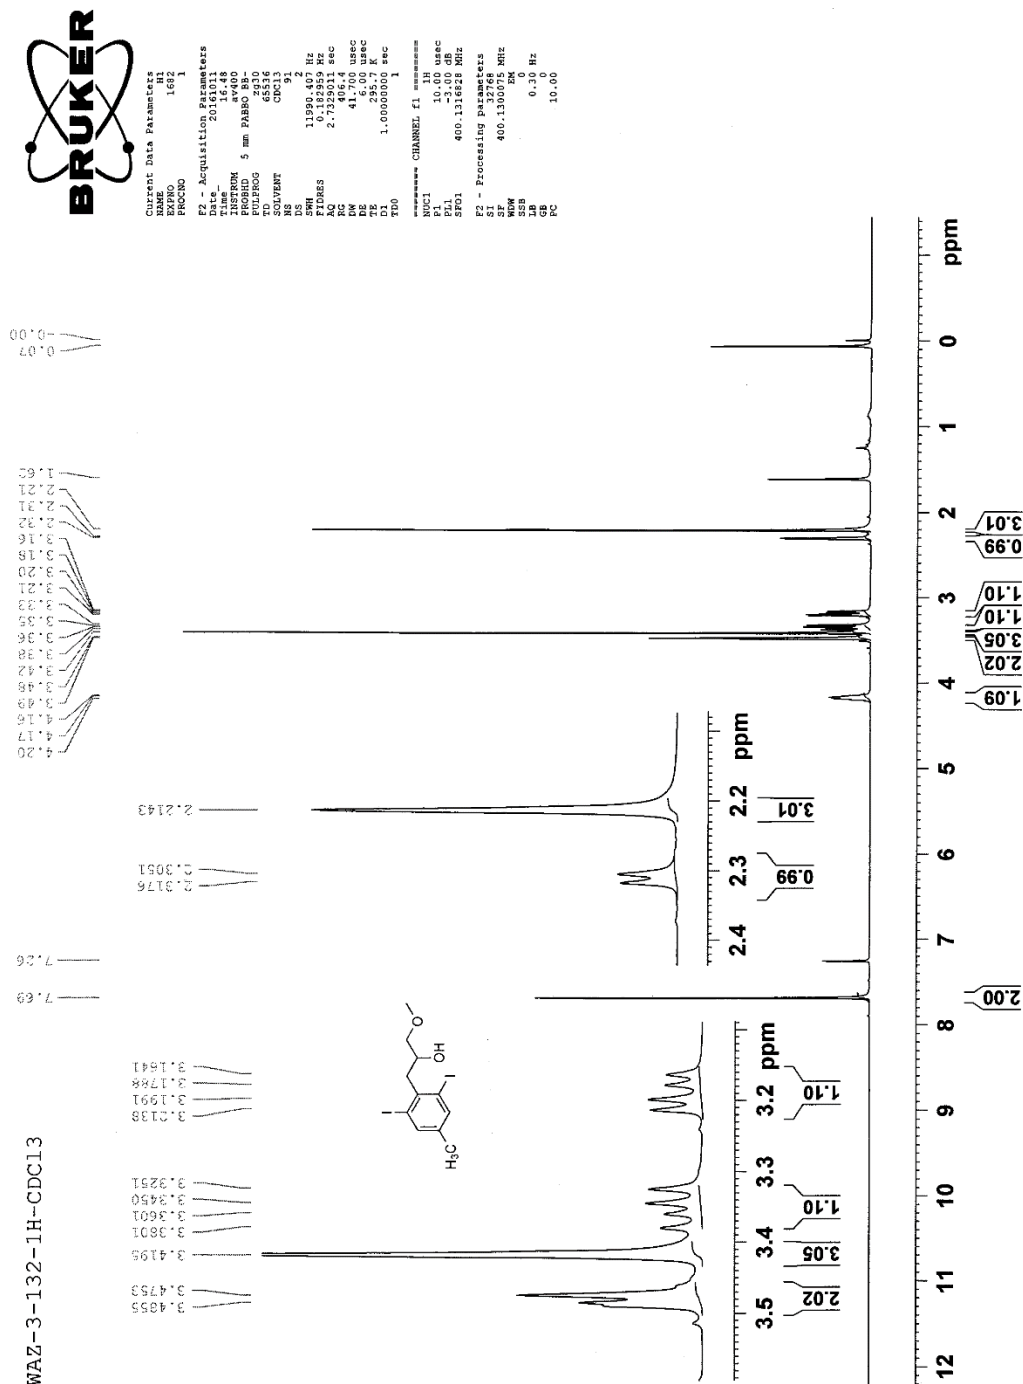

**1.3.14  $^{13}\text{C}$ -NMR of 1-(2,6-diiodo-4-methylphenyl)-3-methoxypropan-2-ol (7g) in  $d\text{-CDCl}_3$  at 25  $^\circ\text{C}$ .**

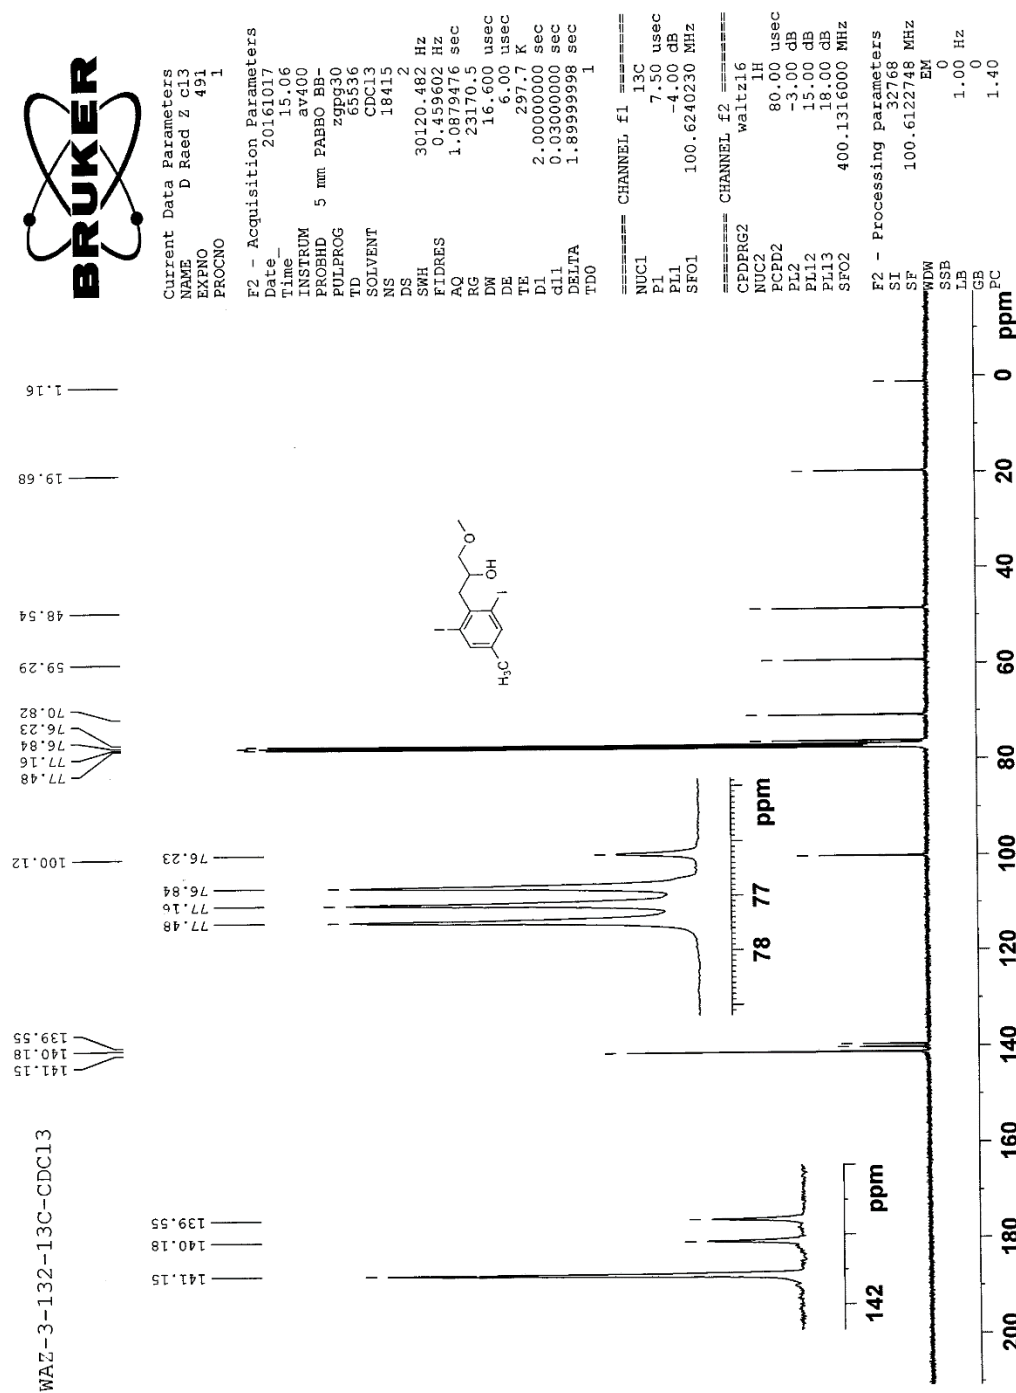

1.3.15 <sup>1</sup>H-NMR of 1-(tert-butoxy)-3-(2,6-diiodo-4-methylphenyl)propan-2-ol (7h) in d-CDCl<sub>3</sub> at 25 °C.

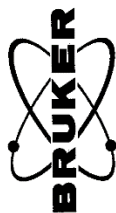

Current Data Parameters: HI  
 NAME: 1699  
 EXPMO: 1  
 PROCNO: 1  
 F2 - Acquisition Parameters  
 Date\_ Time: 2011.11.15.11  
 INSTRM: av400  
 PULPROG: zgpg30  
 TD: 65536  
 CH1: CDCl3  
 SOLVENT: CDCl3  
 NS: 68  
 DS: 4  
 SWH: 11990.462 Hz  
 FIDRES: 0.182259 Hz  
 AQ: 2.722801 sec  
 SFO1: 400.111828 MHz  
 DM: 41.700 usec  
 DE: 6.00 usec  
 TE: 300.2 K  
 D1: 1.00000000 sec  
 TPO: 1  
 ===== CHANNEL f1 =====  
 NUC1: 1H  
 P1: 10.00 usec  
 PL1: -1.00 dB  
 SFO1: 400.111828 MHz  
 F2 - Processing parameters  
 SI: 32768  
 SF: 400.111828 MHz  
 EQ: EM  
 NSB: 0  
 SSB: 0 Hz  
 GB: 0 Hz  
 PC: 10.00

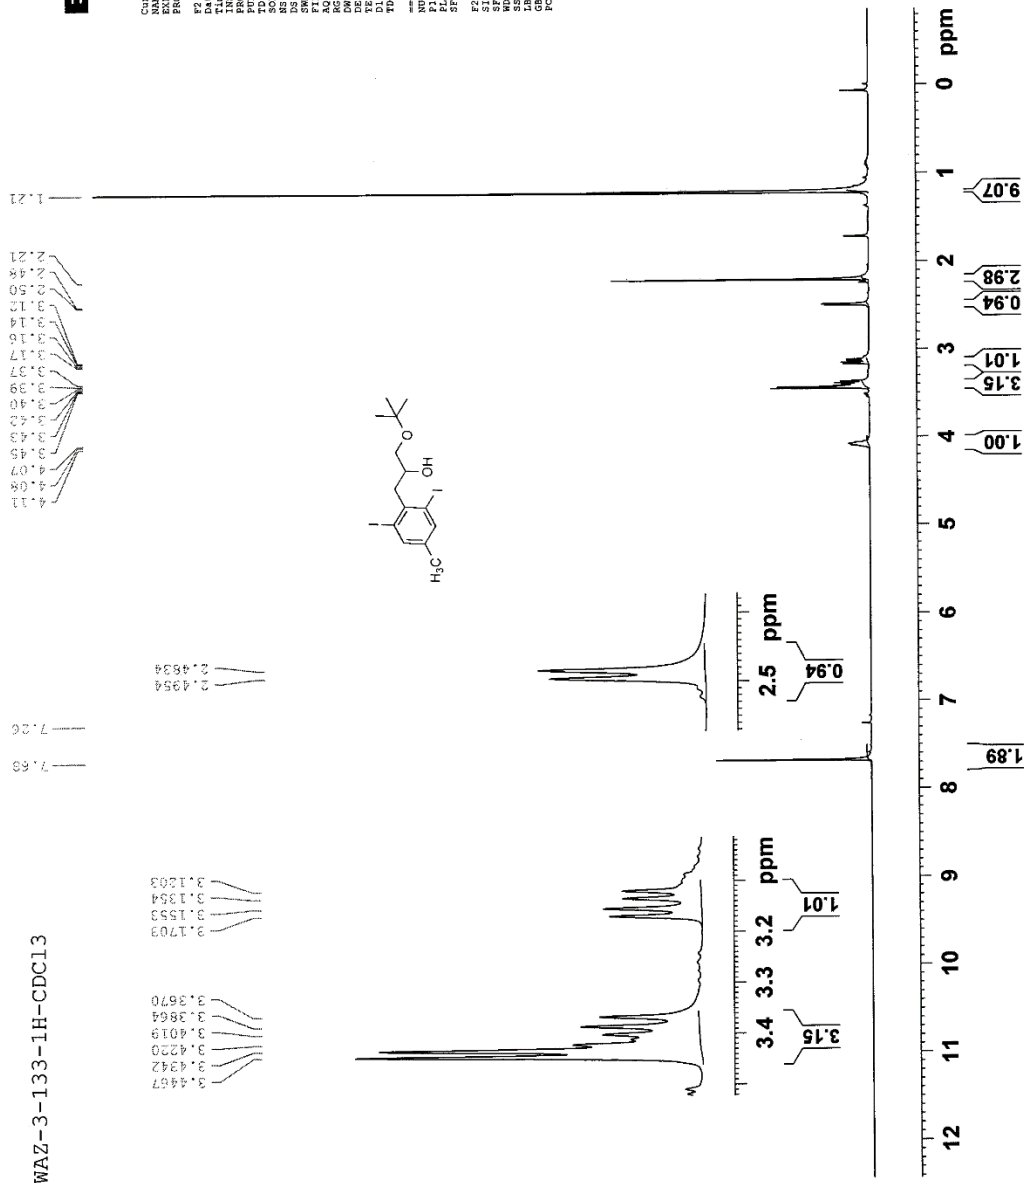



**1.3.16  $^{13}\text{C}$ -NMR of 1-(tert-butoxy)-3-(2,6-diiodo-4-methylphenyl)propan-2-ol (7h) in  $d\text{-CDCl}_3$  at 25 °C.**

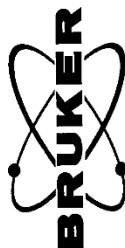

Current Data Parameters  
 NAME D Reqd Z c13  
 EXPNO 492  
 PROCNO 1

F2 - Acquisition Parameters  
 Date\_ 20161019  
 Time 16.15  
 INSTRUM av400  
 PROBHD 5 mm PABBO BB-  
 PULPROG zgpg30  
 TD 65536  
 SOLVENT CDCl3  
 NS 15845  
 DS 2  
 SWH 30120.482 Hz  
 FIDRES 0.459602 Hz  
 AQ 1.0879476 sec  
 RG 23170.5  
 DW 16.600 usec  
 DE 6.00 usec  
 TE 296.4 K  
 DI 2.0000000 sec  
 d11 0.03000000 sec  
 DELTA 1.89999998 sec  
 TDO 1

==== CHANNEL f1 =====  
 NUC1  $^{13}\text{C}$   
 P1 7.50 usec  
 PL1 -4.00 dB  
 SFO1 100.6240230 MHz

==== CHANNEL f2 =====  
 CPDPRG2 waltz16  
 NUC2  $^1\text{H}$   
 PCPD2 80.00 usec  
 PL2 -3.00 dB  
 PL12 15.00 dB  
 PL13 18.00 dB  
 SFO2 400.1316000 MHz

F2 - Processing parameters  
 SI 32768  
 SF 100.6122785 MHz  
 EM 0  
 WDW 0  
 SSB 0  
 LB 1.00 Hz  
 GB 0  
 FC 1.40

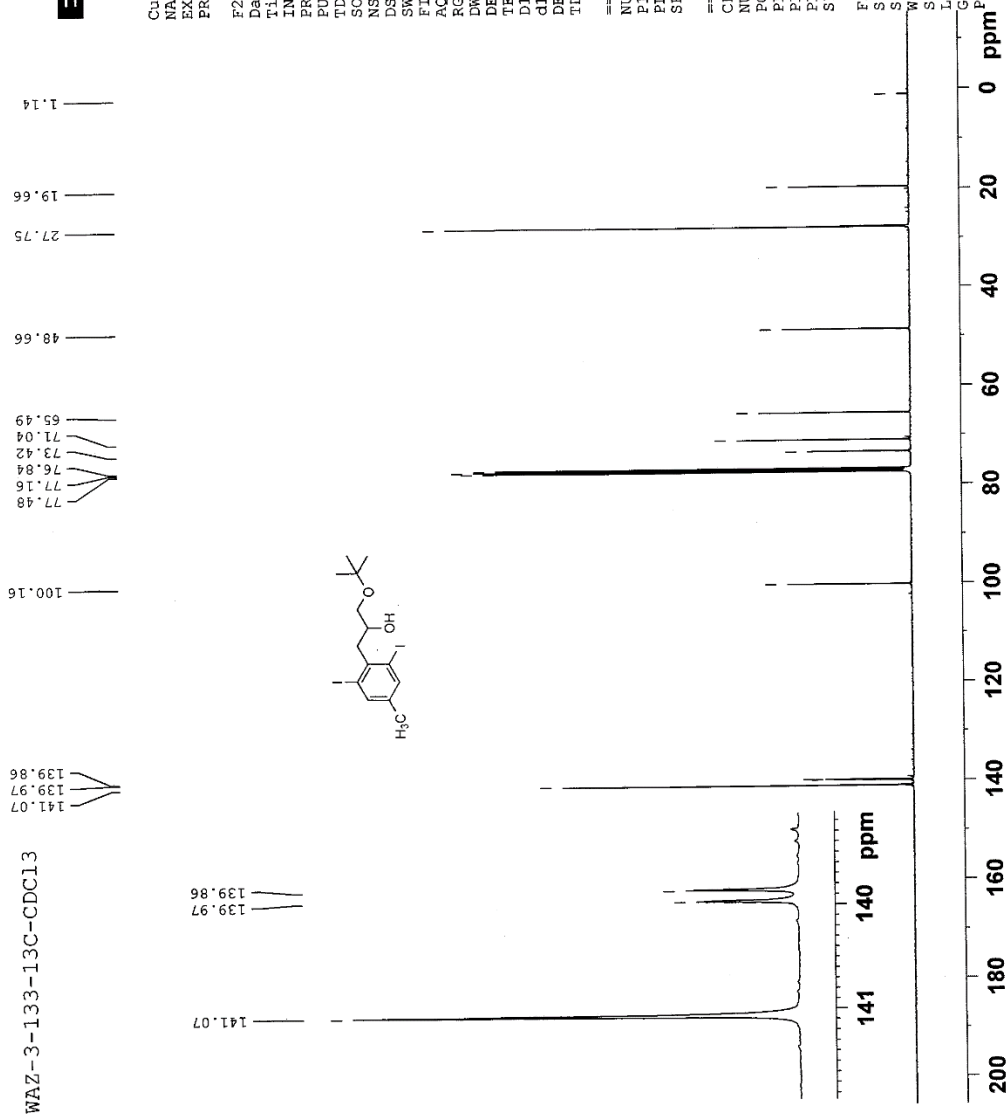

1.3.17 <sup>1</sup>H-NMR of 2-(2,6-diiodo-4-methylphenyl)-1-phenylethan-1-ol (7i) in d-CDCl<sub>3</sub> at 25 °C.

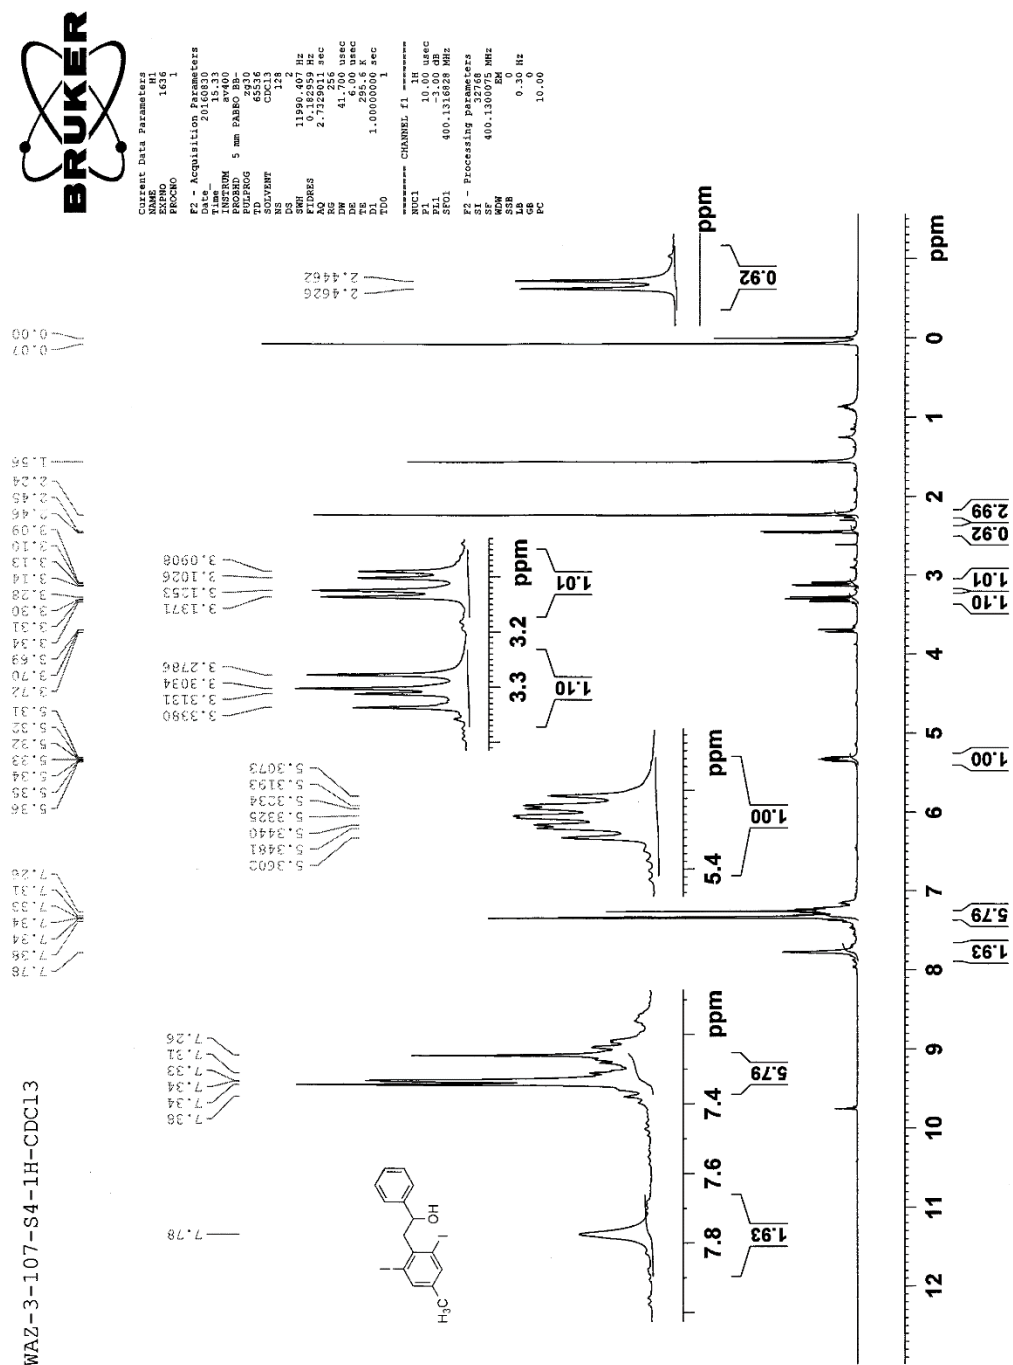

### 1.3.18 $^{13}\text{C}$ -NMR of 2-(2,6-diiodo-4-methylphenyl)-1-phenylethan-1-ol (7i) in $d\text{-CDCl}_3$ at 25 °C.

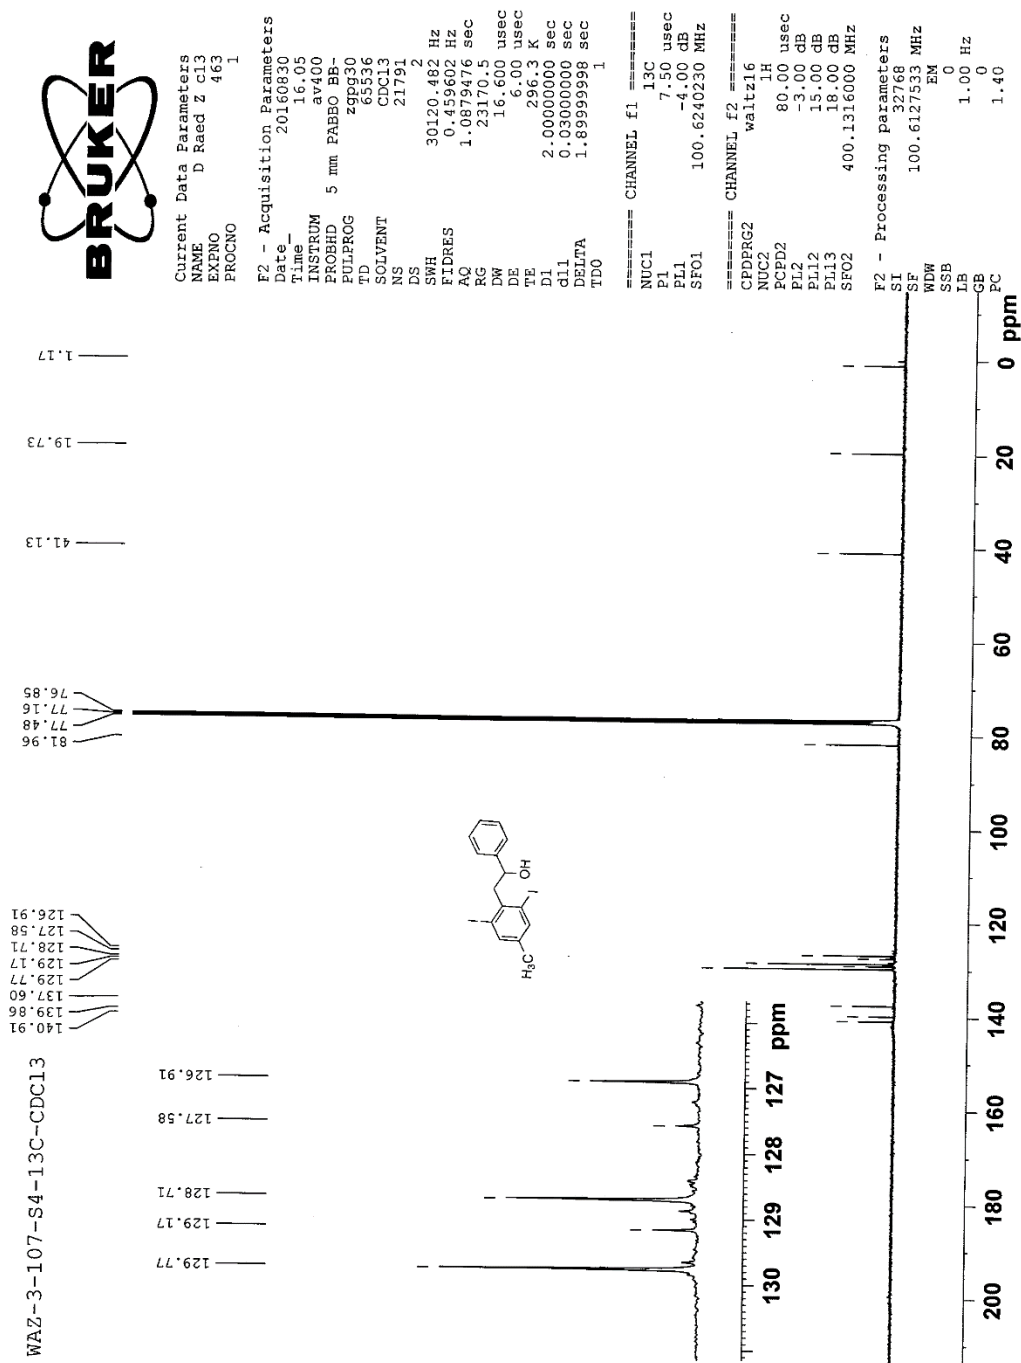

### 1.3.19 <sup>1</sup>H-NMR of (S)-1-(benzyloxy)-3-(2,6-diiodo-4-methylphenyl)propan-2-ol (7j) in d-CDCl<sub>3</sub> at 25 °C.

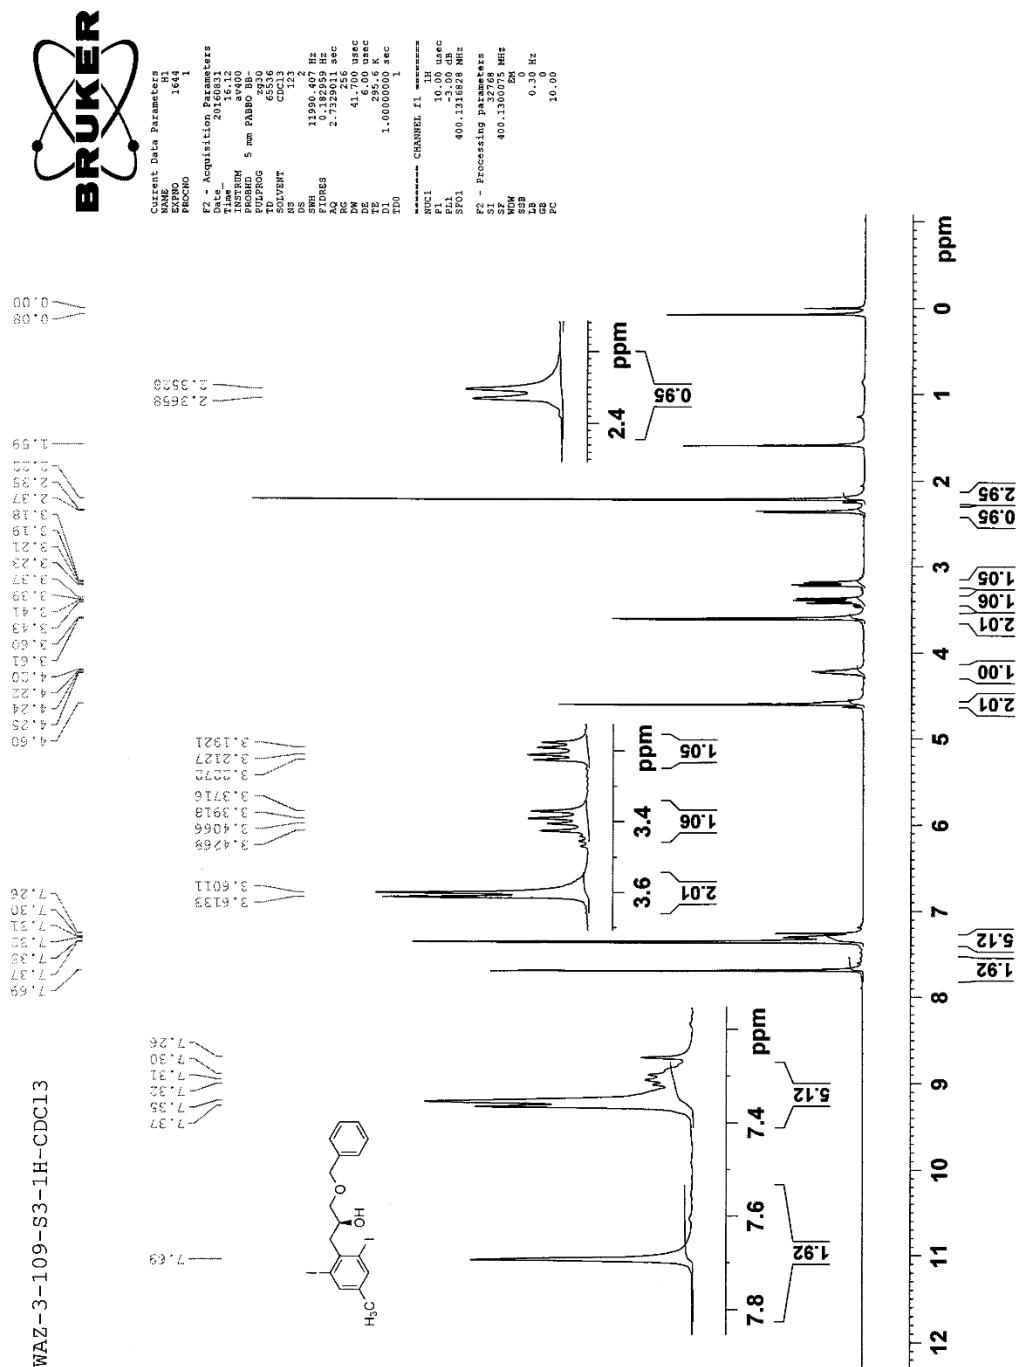

**1.3.20  $^{13}\text{C}$ -NMR of (S)-1-(benzyloxy)-3-(2,6-diiodo-4-methylphenyl)propan-2-ol (7j) in  $d\text{-CDCl}_3$  at 25 °C.**

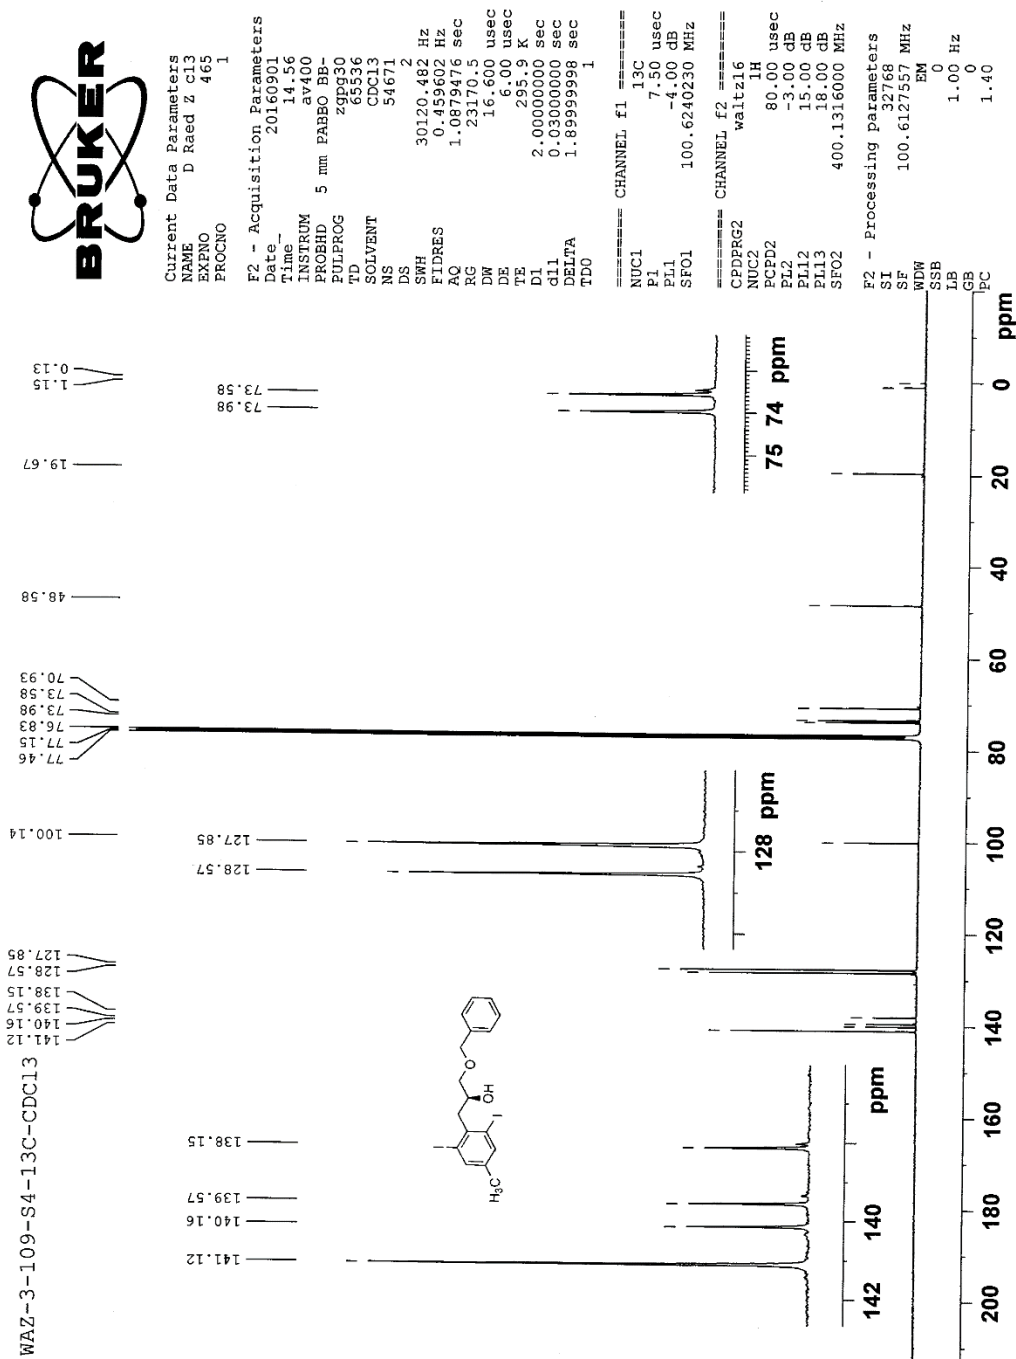

### 1.3.21 <sup>1</sup>H-NMR of 1-(2,6-diiodo-4-methylphenyl)-3-(2-methoxyphenoxy)propan-2-ol (7k) in d-CDCl<sub>3</sub> at 25 °C.

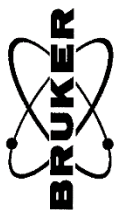

```

Current Data Parameters
NAME          1645
EXPNO         1
PROCNO        1

F2 - Acquisition Parameters
Time          20.16
Date_        16.11
INSTRUM       v400
PROBHD        5 mm PA160
PULPROG       zgpg30
AQ            0.0516
RG            651.6
SOLVENT       CDCl3
NS            64
DS            4
SWH           11990.407 Hz
FIDRES       0.182459 Hz
AQ           2.732911 sec
RG           2.132911
RQ           41.700 usec
DW           25.000 usec
DE           1.0000000 sec
TE           300.2 K
D1           1.00000000 sec
TD0          1

===== CHANNEL f1 =====
NUC1          13C
PULP1         zgpg30
PL1           0.00 usec
PL12          -3.00 dB
SFO1          400.1318228 MHz
===== CHANNEL f2 =====
F2 - Processing parameters
SI            32768
SF            400.130075 MHz
WDW           EM
SSB           0
LB            0.30 Hz
GB            0
PC            10.00
  
```

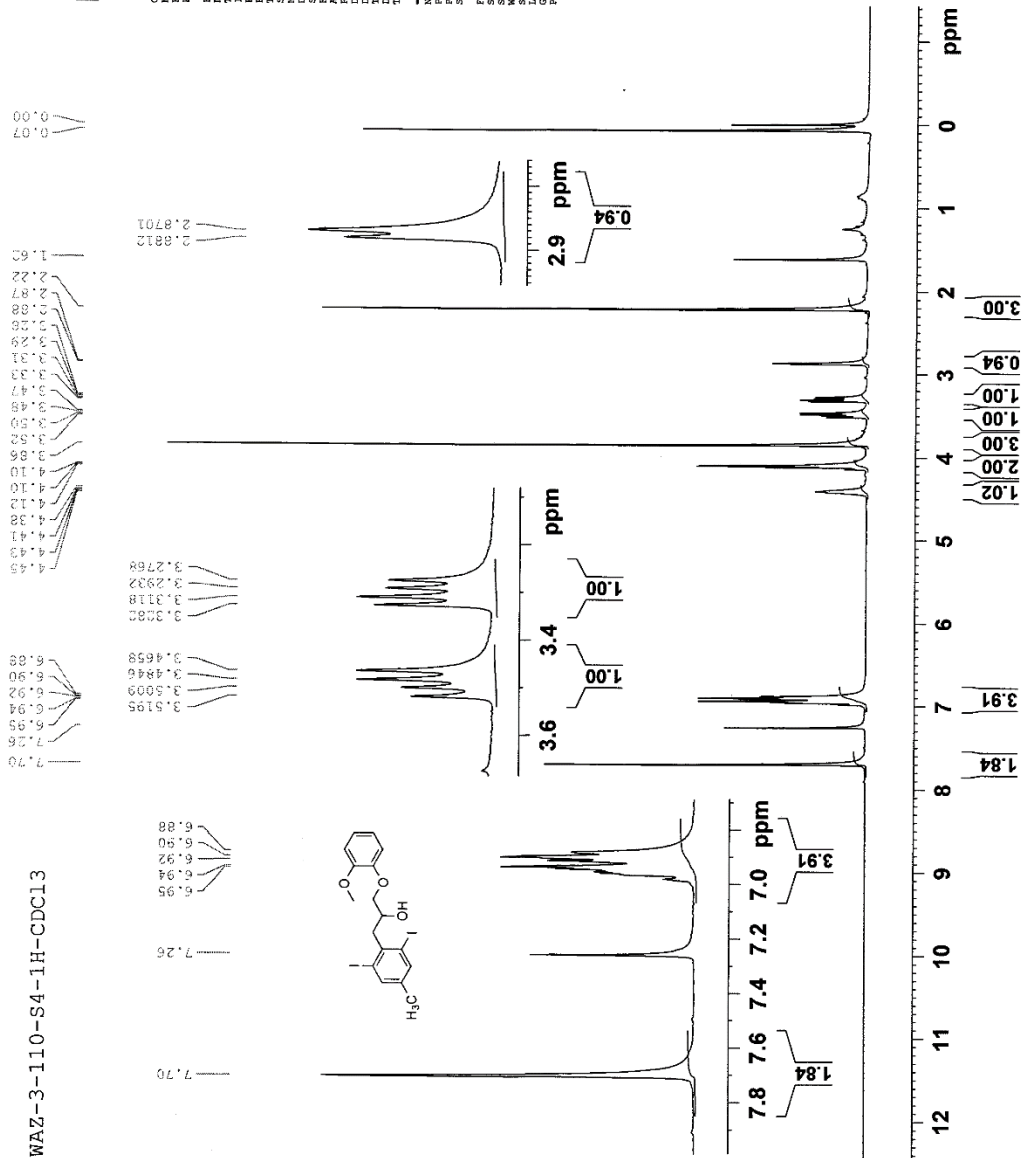

**1.3.22  $^{13}\text{C}$ -NMR of 1-(2,6-diiodo-4-methylphenyl)-3-(2-methoxyphenoxy)propan-2-ol (7k) in  $d\text{-CDCl}_3$  at 25 °C.**

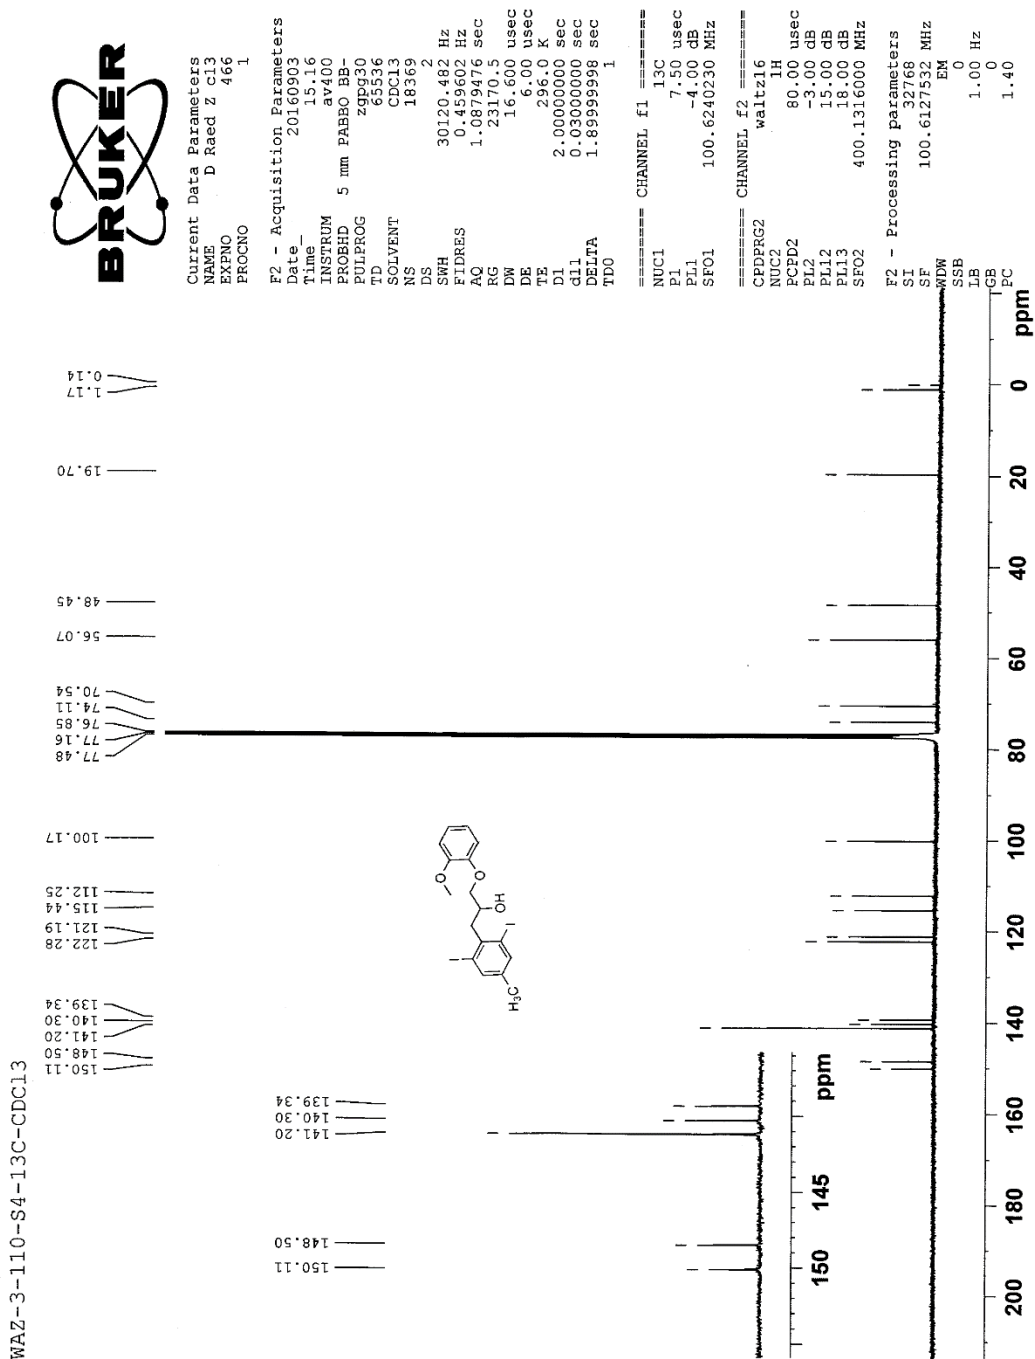

1.3.23 <sup>1</sup>H-NMR of 1-(4-bromophenoxy)-3-(2,6-diiodo-4-methylphenyl)propan-2-ol (7I) in d-CDCl<sub>3</sub> at 25 °C.

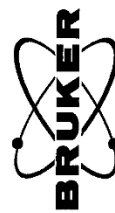

Current Data Parameters  
 NAME 7I  
 EXPNO 1650  
 PROCNO 1  
 F2 - Acquisition Parameters  
 Date\_ 20140514  
 Time 14:19  
 INSTRUM av400  
 PULPROG zgpg30  
 TD 65536  
 NS 4096  
 DS 4  
 FIDRES 0.182555 Hz  
 AQ 2.7325911 sec  
 DW 41.700 usec  
 DE 2.00 usec  
 D1 1.00000000 sec  
 TDO 1  
 ===== CHANNEL f1 =====  
 NUC1 1H  
 P1 10.00 usec  
 PL1 -2.00 dB  
 SFO1 400.131628 MHz  
 F2 - Processing parameters  
 SI 32768  
 SF 400.130073 MHz  
 WDM 1  
 LB 0.30 Hz  
 GB 0  
 PC 10.00

WAZ-3-111-S4-1H-CDCl3

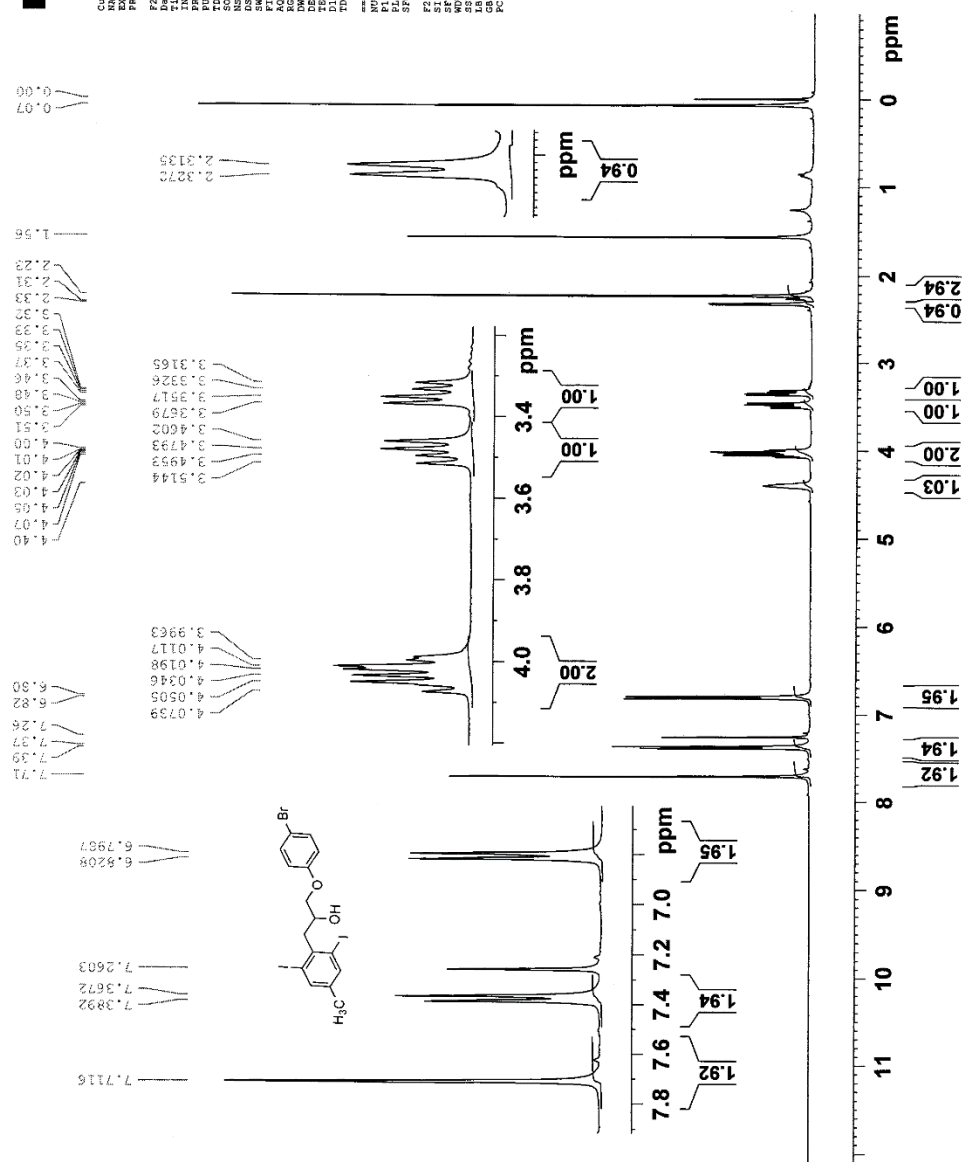



### 1.3.24 <sup>13</sup>C-NMR of 1-(4-bromophenoxy)-3-(2,6-diiodo-4-methylphenyl)propan-2-ol (7I) in d-CDCl<sub>3</sub> at 25 °C.

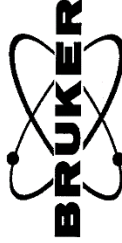

Current Data Parameters  
NAME: D Raed 2 c13  
EXPNO: 467  
PROCNO: 1

F2 - Acquisition Parameters  
Date\_: 20160904  
Time: 13.24  
INSTRUM: av400  
PROBHD: 5 mm PABBO BB-  
PULPROG: zgpg30  
TD: 65536  
SOLVENT: CDCl3  
NS: 23196  
DS: 2  
SWH: 30120.482 Hz  
FIDRES: 0.459602 Hz  
AQ: 1.0879476 sec  
RG: 23170.5  
DW: 16.600 usec  
DE: 6.00 usec  
TE: 296.4 K  
D1: 2.00000000 sec  
d11: 0.03000000 sec  
DELTA: 1.89999999 sec  
TDO: 1

==== CHANNEL f1 =====  
NUC1: 13C  
P1: 7.50 usec  
PL1: -4.00 dB  
SFO1: 100.6240230 MHz

==== CHANNEL f2 =====  
CPDPRG2: waitz16  
NUC2: 1H  
PCPD2: 80.00 usec  
PL2: -3.00 dB  
PL12: 15.00 dB  
PL13: 18.00 dB  
SFO2: 400.1316000 MHz

F2 - Processing parameters  
SI: 32768  
SF: 100.6127528 MHz  
WDW: EM  
SSB: 0  
GB: 1.00 Hz  
PC: 1.40

WAZ-3-111-S4-13C-CDCl3

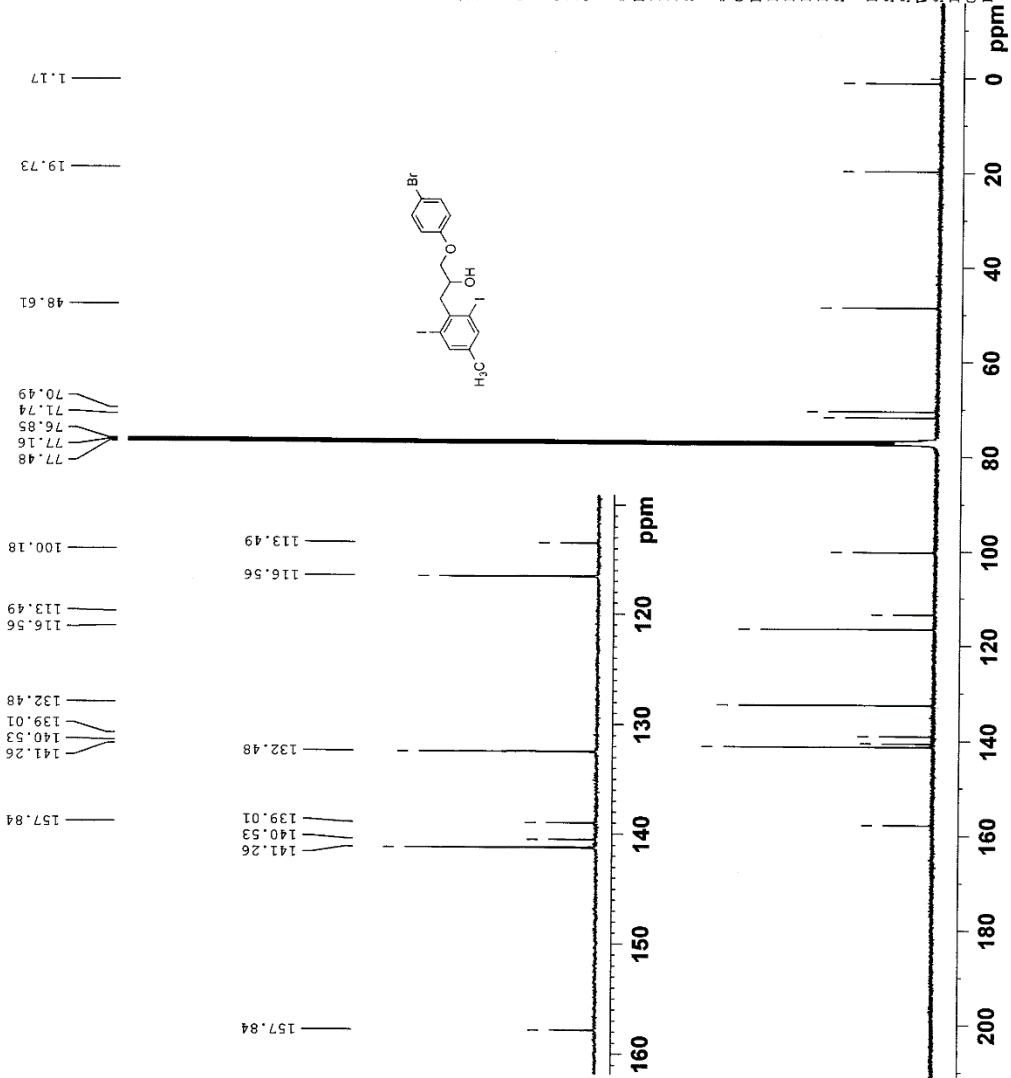

1.3.25 <sup>1</sup>H-NMR of 1-(4-fluoro-2,6-diiodophenyl)butan-2-ol (7m) in d-CDCl<sub>3</sub> at 25 °C.

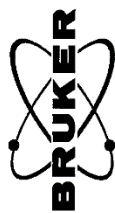

Current Data Parameters  
 Name: WAZ-3-122-1H-CDCl3  
 EXPNO: 1663  
 PROCNO: 1  
 F2 - Acquisition Parameters  
 Date\_: 20160925  
 Time: 11:50  
 INSTRUM: spect  
 PROBHD: 5 mm PABBO BB-  
 PULPROG: zgpg30  
 TD: 65536  
 SOLVENT: CDCl3  
 DS: 62  
 SWH: 11890.407 Hz  
 FWHM: 118.904 Hz  
 AQ: 2.7322911 sec  
 RG: 41.256  
 DE: 41.256 usec  
 DB: 41.256 usec  
 TE: 295.6 K  
 TD0: 1.0000000 sec  
 CHANNEL f1  
 NUC1: 1H  
 P1: 10.00 usec  
 SFO1: 400.131828 MHz  
 F2 - Processing parameters  
 SI: 32768  
 SF: 400.130075 MHz  
 WDM: 0  
 SSB: 0  
 GB: 0  
 PC: 10.00

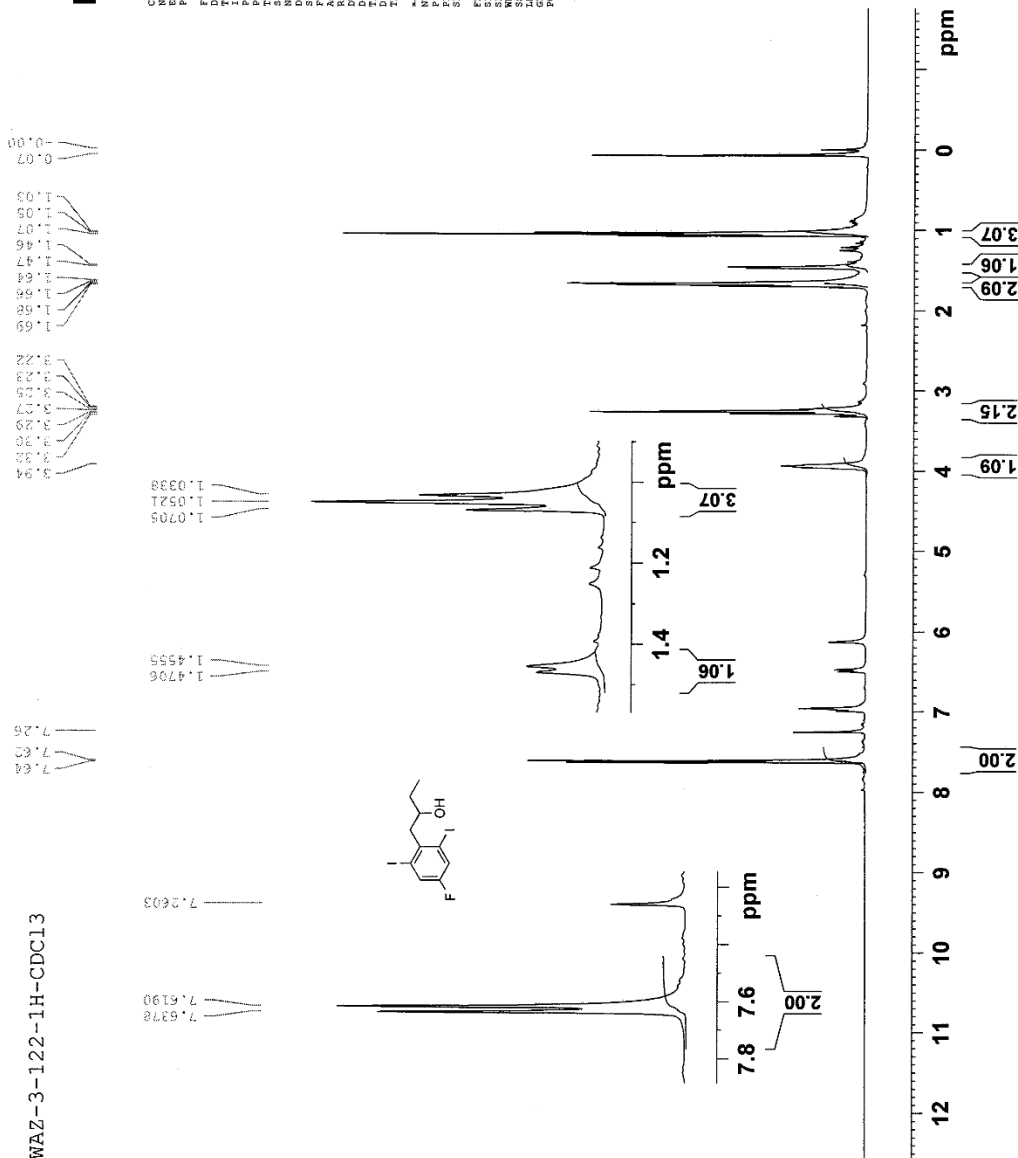

### 1.3.26 $^{13}\text{C}$ -NMR of 1-(4-fluoro-2,6-diiodophenyl)butan-2-ol (7m) in $d\text{-CDCl}_3$ at 25 $^\circ\text{C}$ .

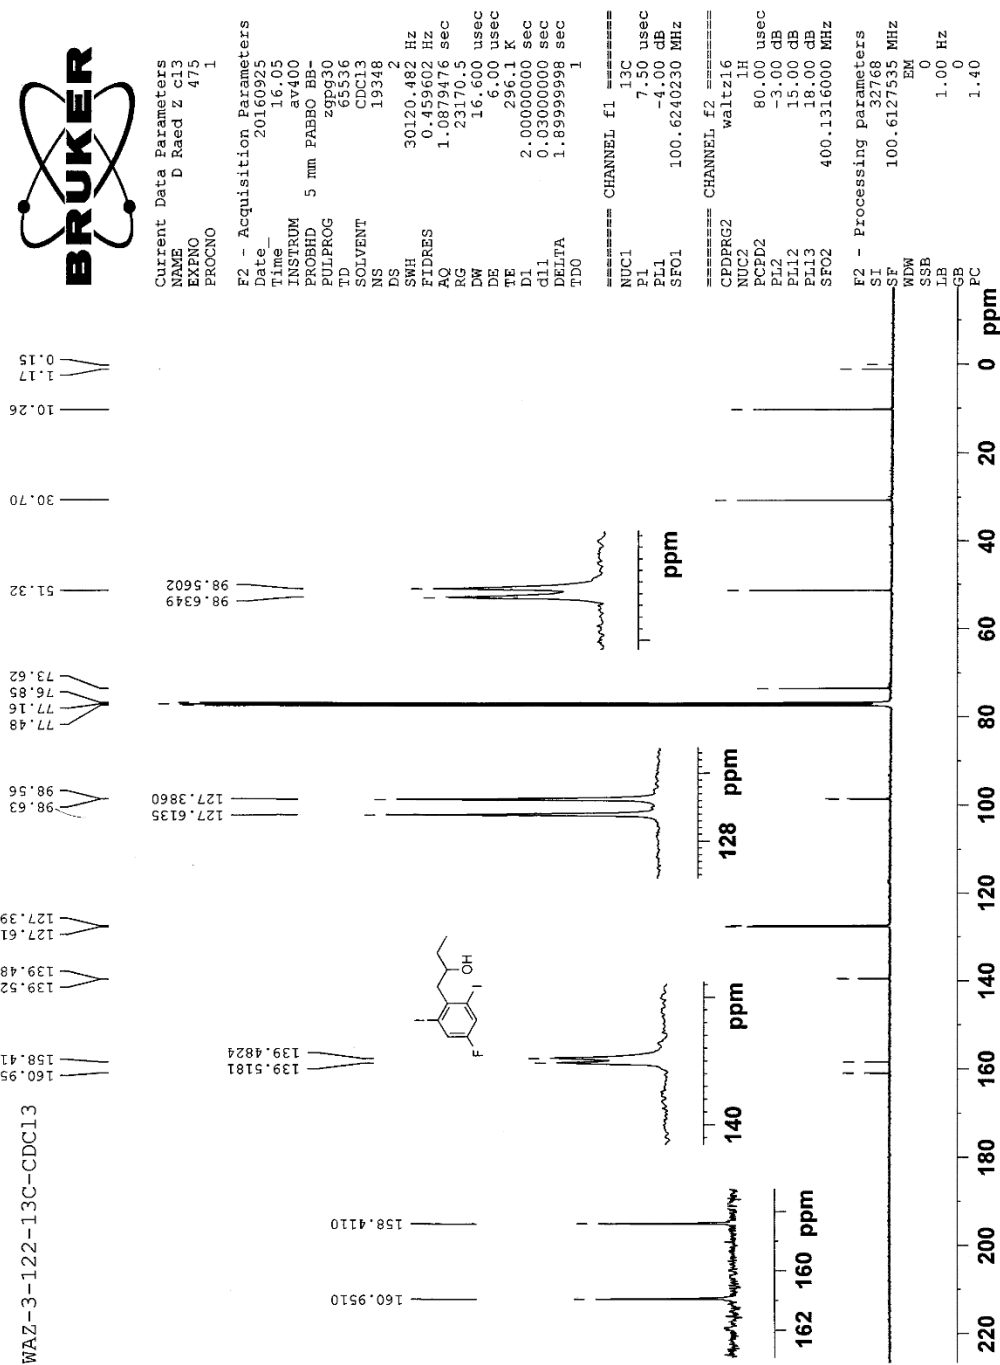

### 1.3.27 <sup>1</sup>H-NMR of (S)-1-(benzyloxy)-3-(4-fluoro-2,6-diiodophenyl)propan-2-ol (7n) in d-CDCl<sub>3</sub> at 25 °C.

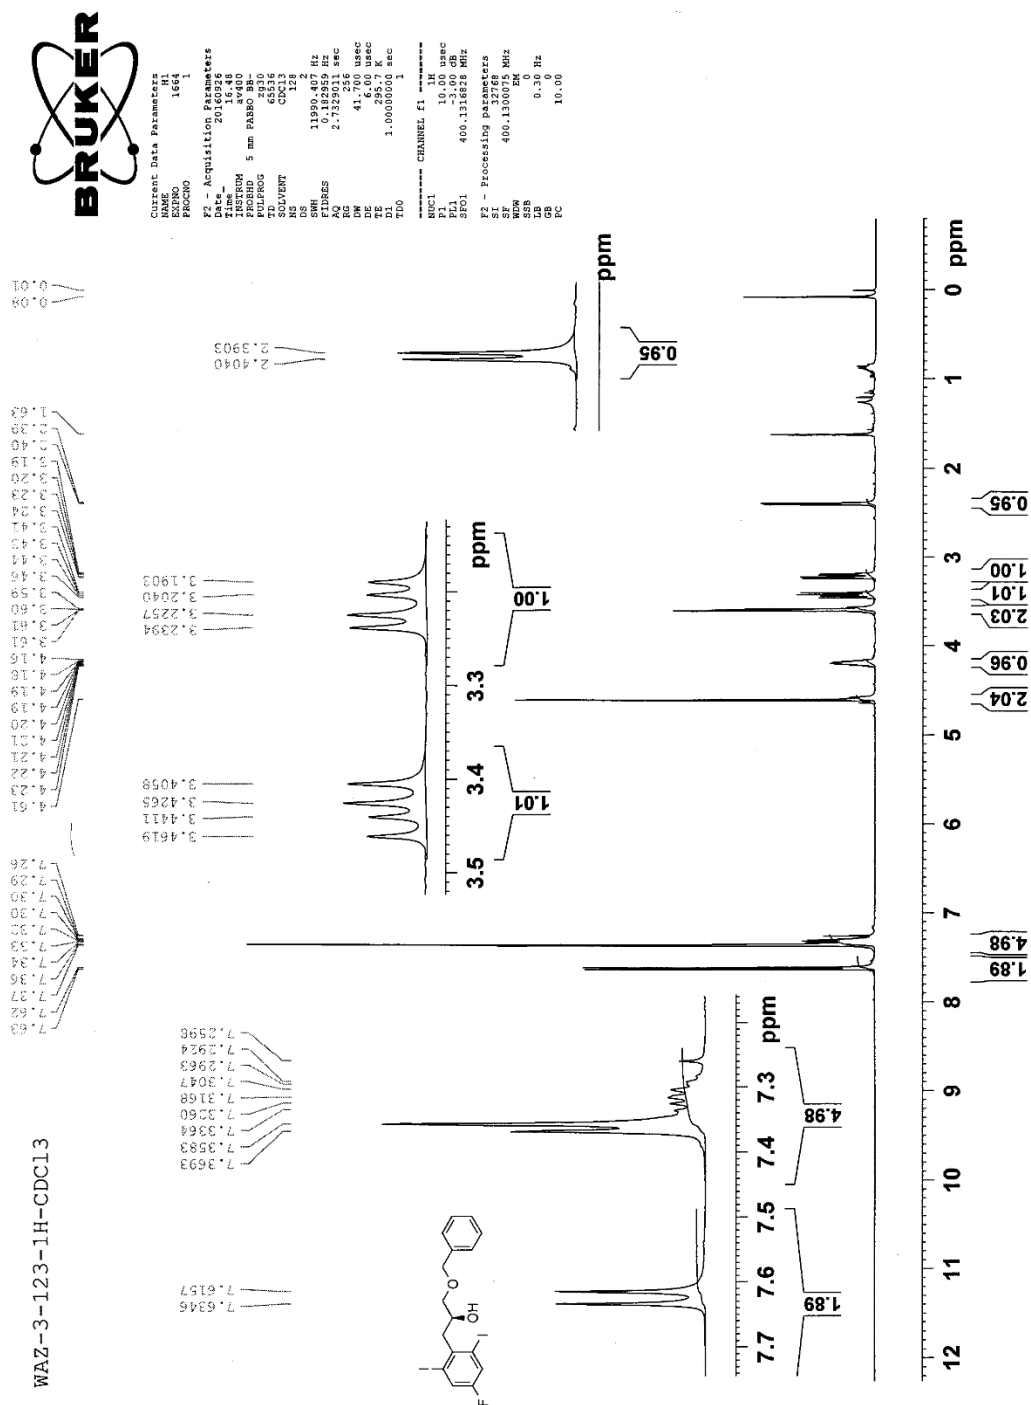

**1.3.28  $^{13}\text{C}$ -NMR of (S)-1-(benzyloxy)-3-(4-fluoro-2,6-diiodophenyl)propan-2-ol (7n) in  $d\text{-CDCl}_3$  at 25 °C.**

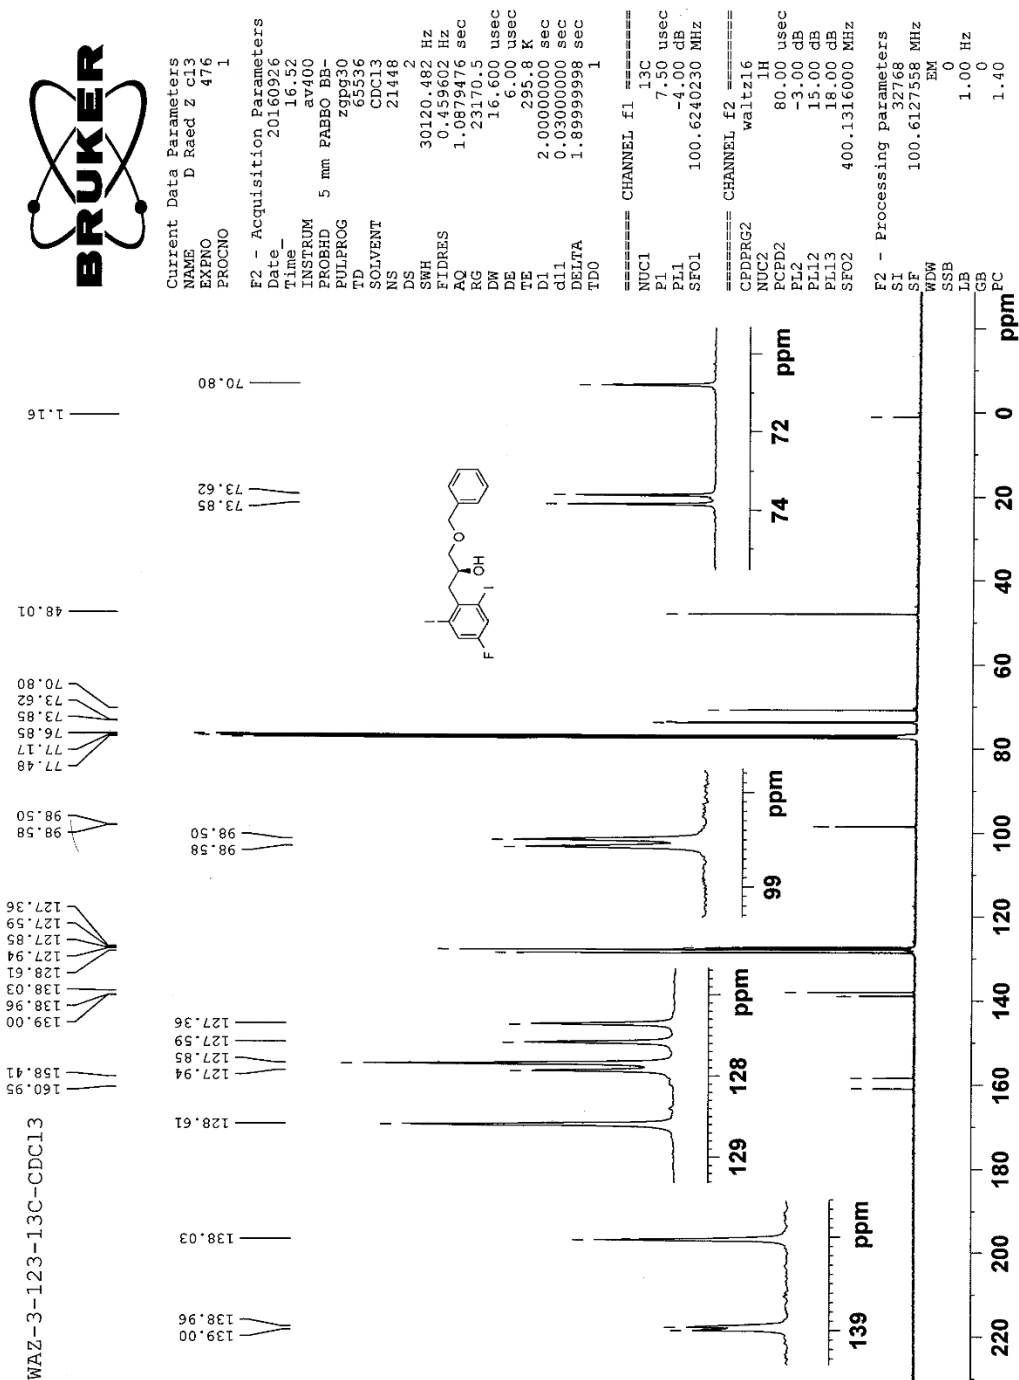

1.3.29 <sup>1</sup>H-NMR of 1-(4-chloro-2,6-diiodophenyl)butan-2-ol (7o) in d-CDCl<sub>3</sub> at 25 °C.

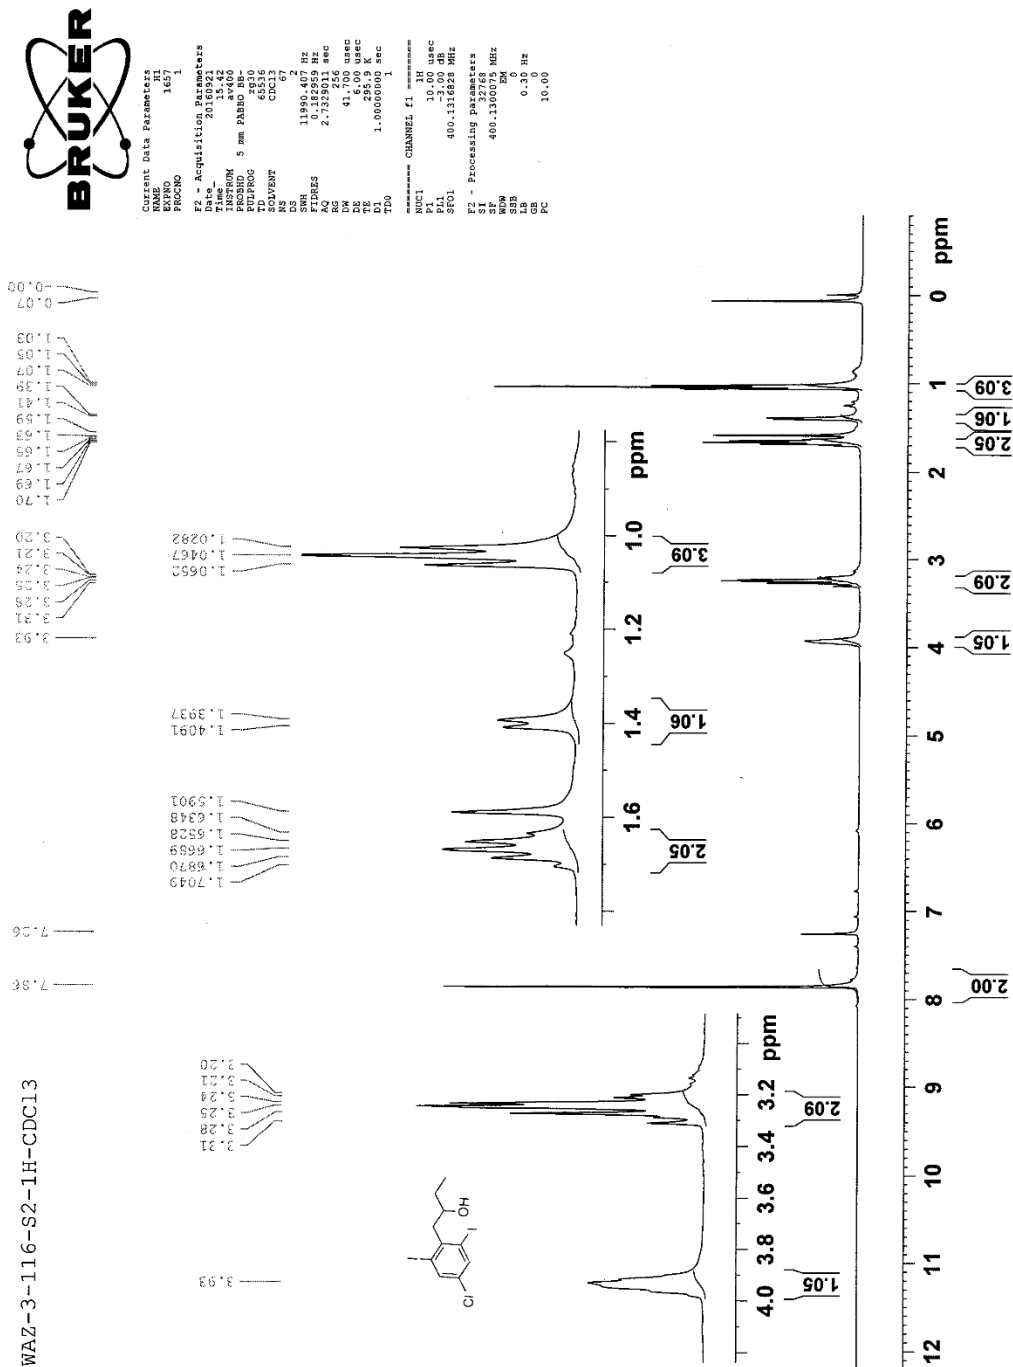

### 1.3.30 $^{13}\text{C}$ -NMR of 1-(4-chloro-2,6-diiodophenyl)butan-2-ol (7o) in $d\text{-CDCl}_3$ at 25 $^\circ\text{C}$ .

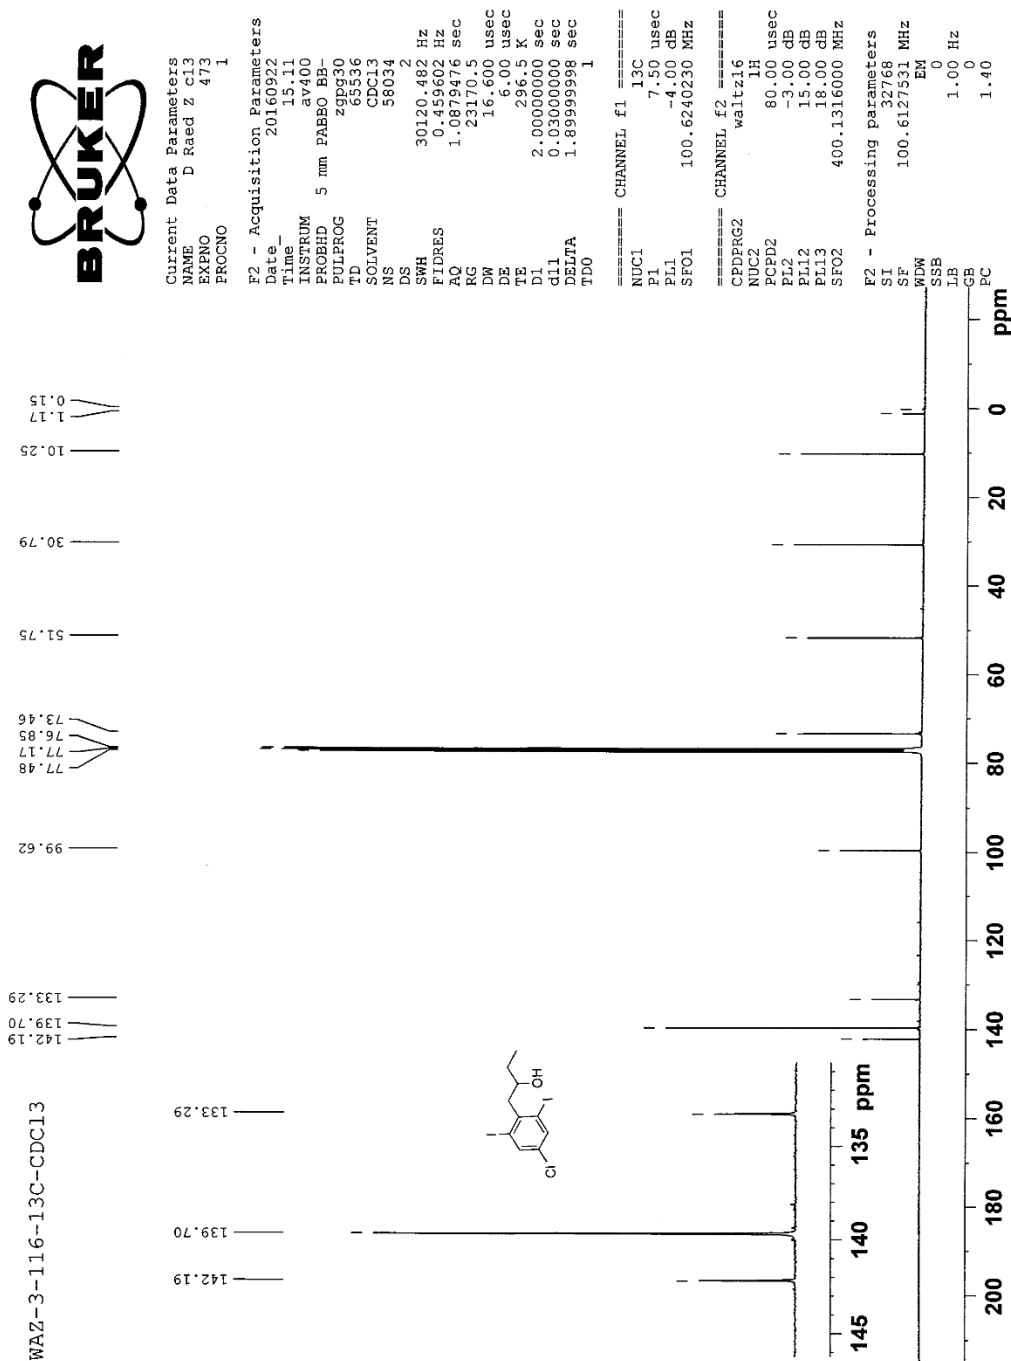

**1.3.31 <sup>1</sup>H-NMR of (S)-1-(benzyloxy)-3-(4-chloro-2,6-diiodophenyl)propan-2-ol (7p) in d-CDCl<sub>3</sub> at 25 °C.**

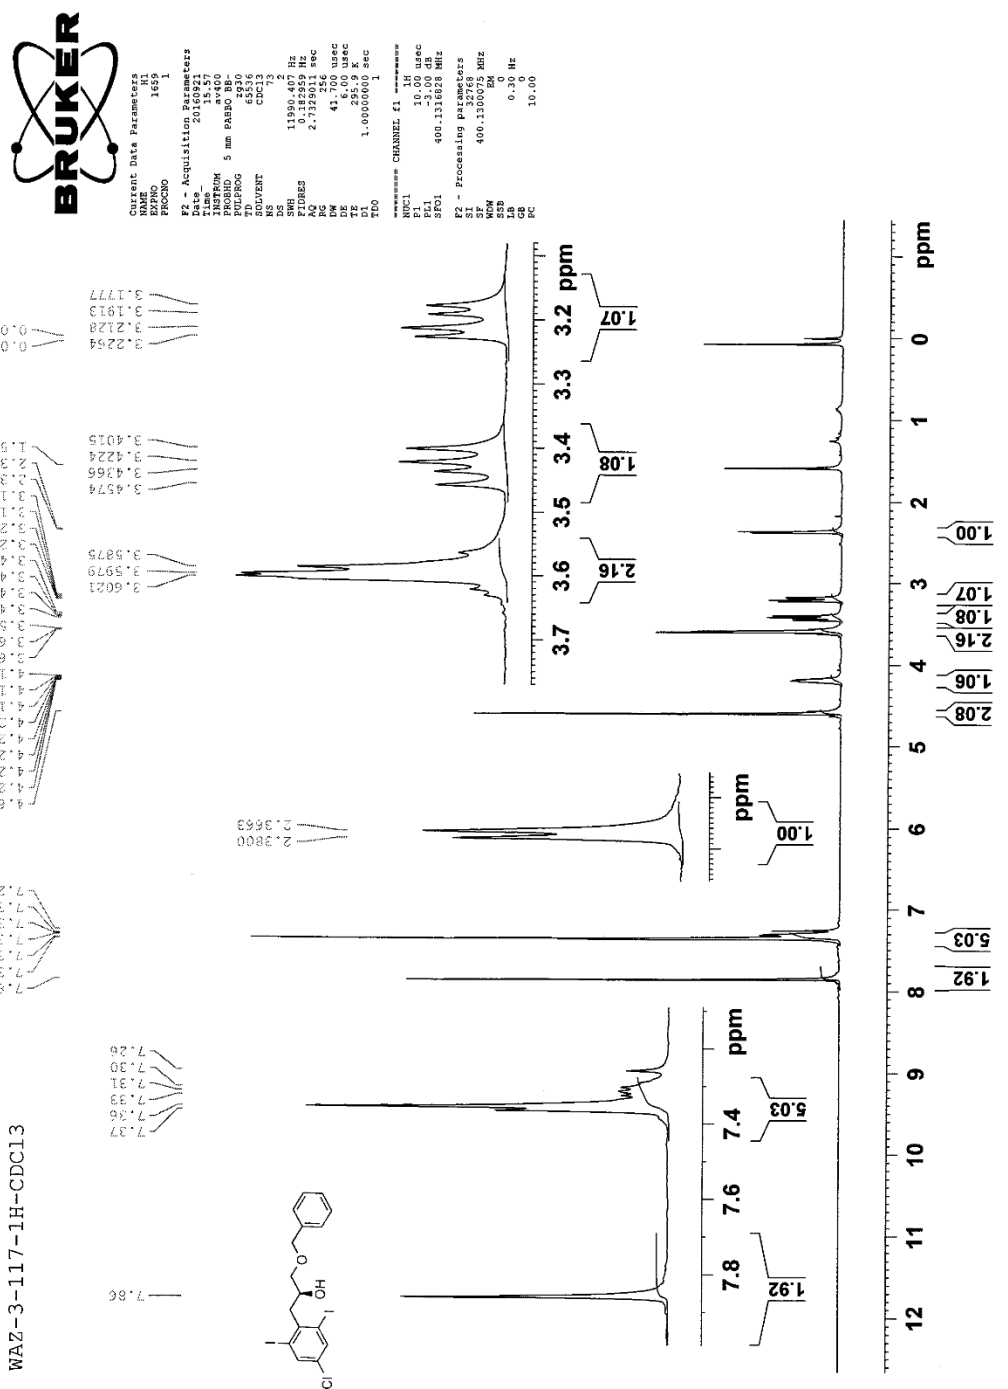



### 1.3.32 <sup>13</sup>C-NMR of (S)-1-(benzyloxy)-3-(4-chloro-2,6-diiodophenyl)propan-2-ol (7p) in d-CDCl<sub>3</sub> at 25 °C.

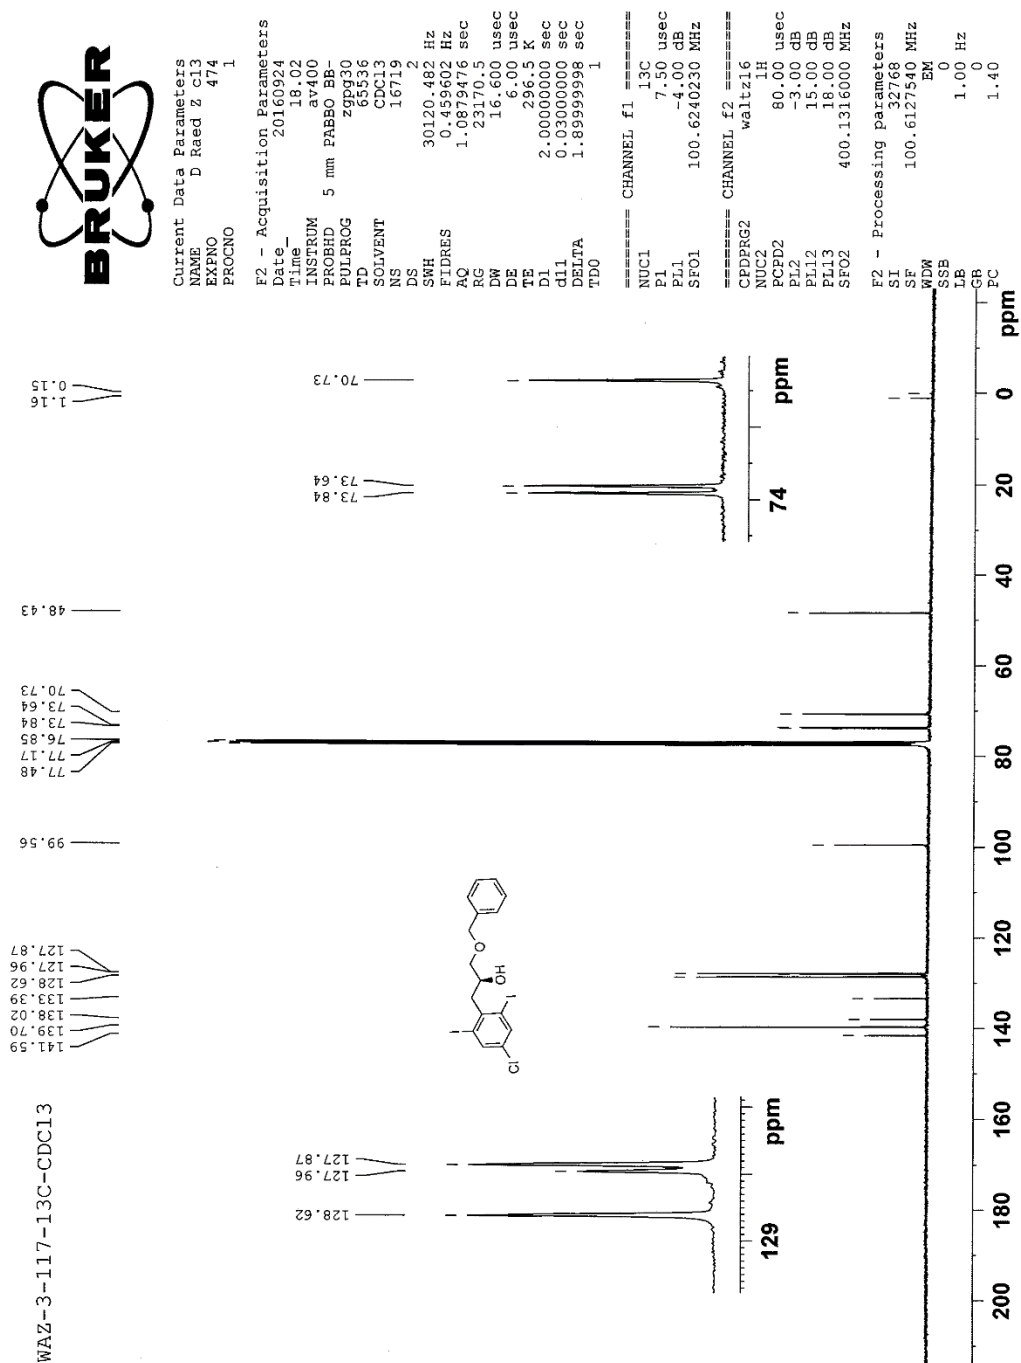

1.3.33 <sup>1</sup>H-NMR of 1-(4-chloro-2,6-diiodophenyl)-3-(2-methoxyphenoxy) propan-2-ol (7q) in d-CDCl<sub>3</sub> at 25 °C.

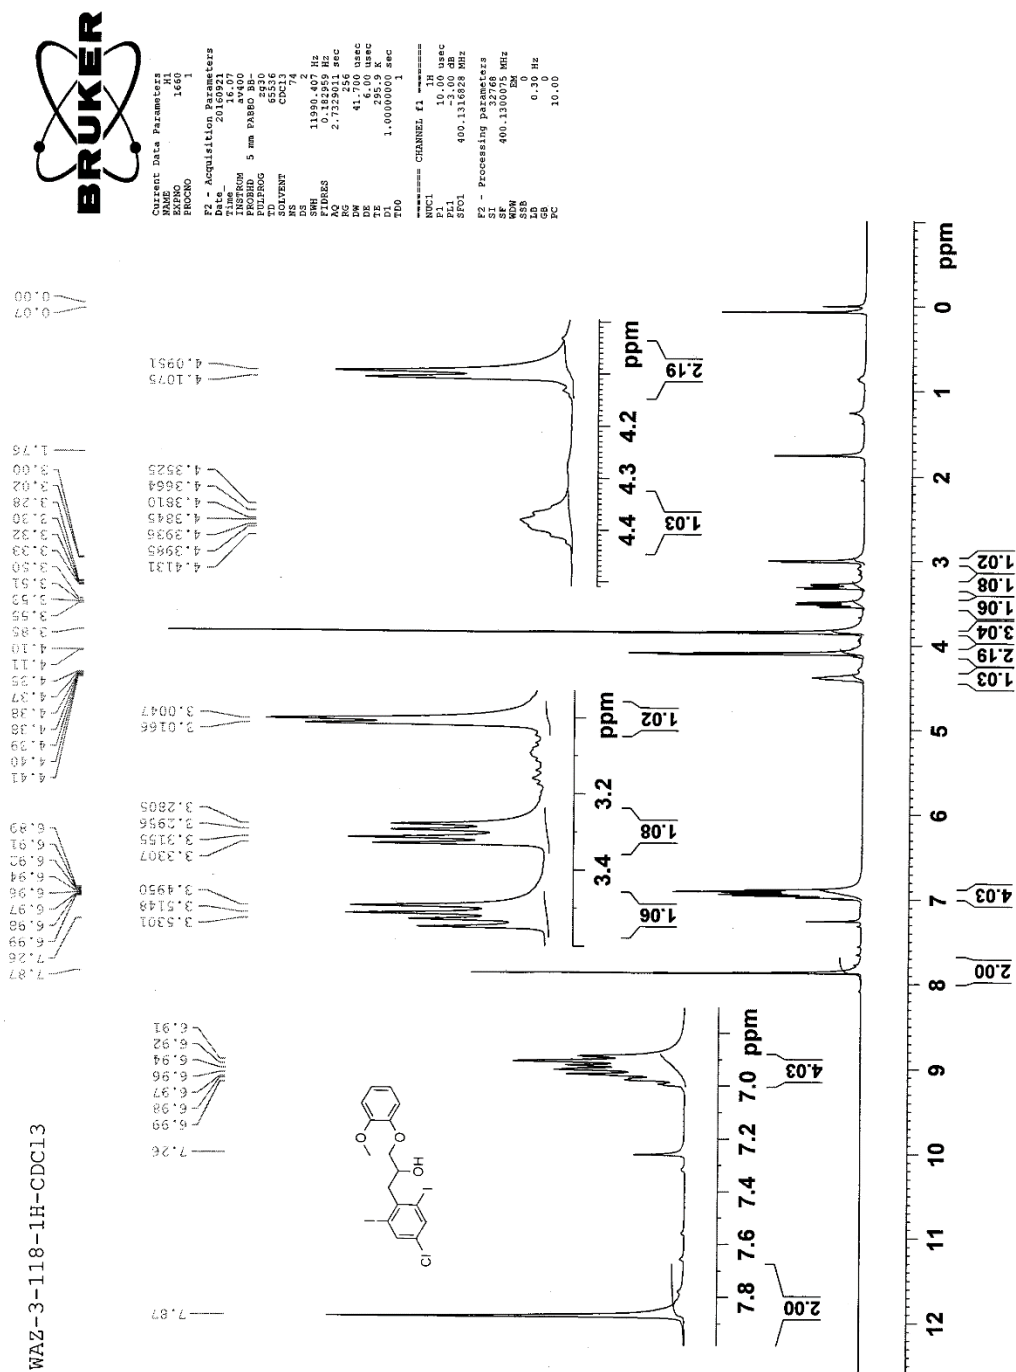

### 1.3.34 $^{13}\text{C}$ -NMR of 1-(4-chloro-2,6-diiodophenyl)-3-(2-methoxyphenoxy) propan-2-ol (7q) in $d\text{-CDCl}_3$ at 25 °C.

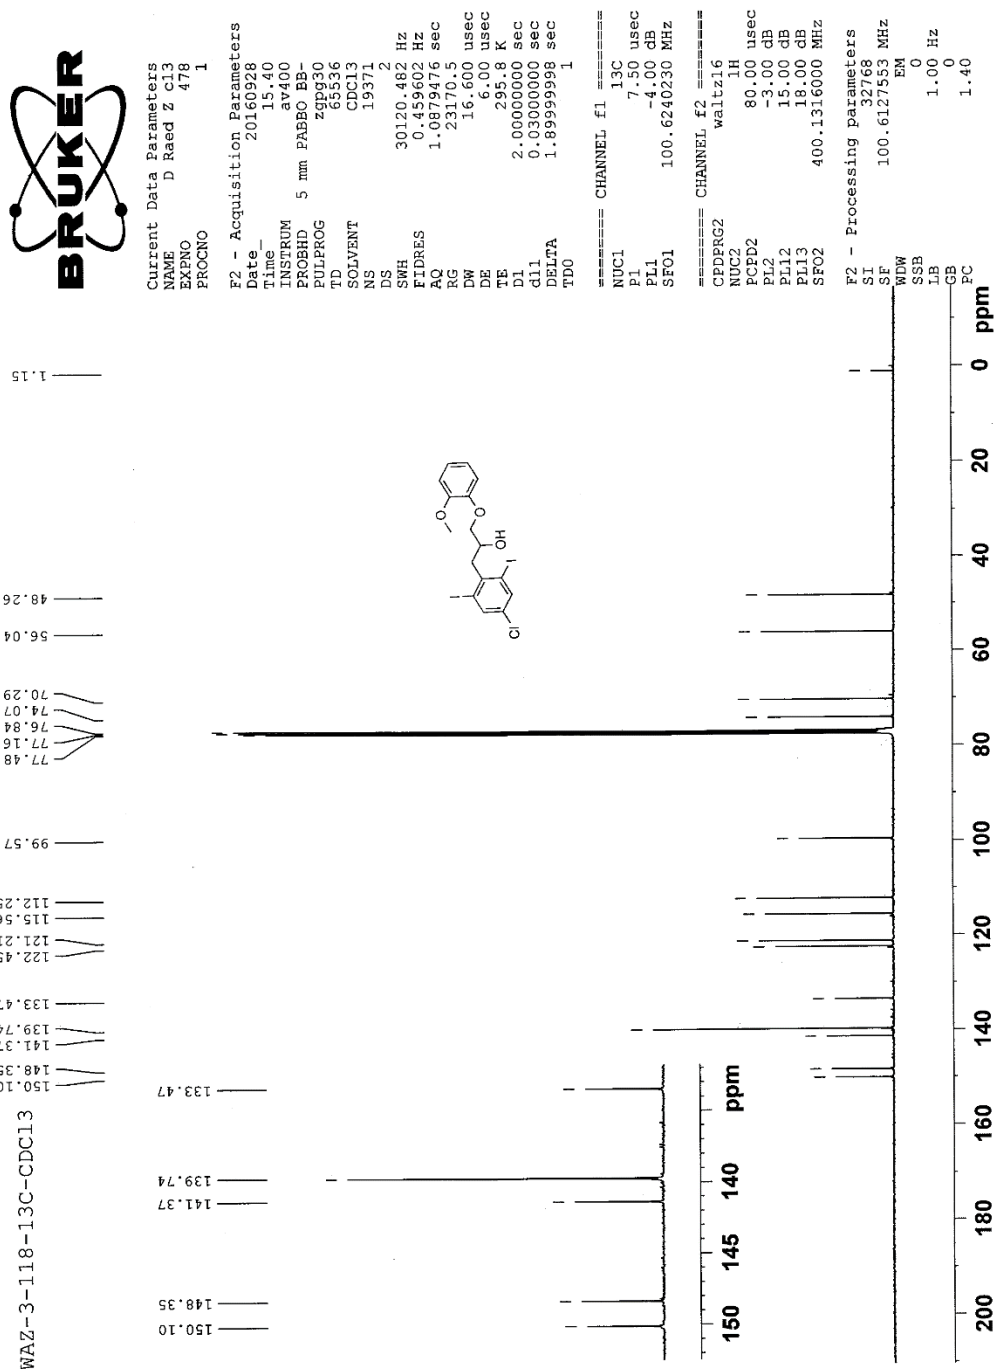

**1.3.35 <sup>1</sup>H-NMR of 1-(4-chloro-2,6-diiodophenyl)-3-(o-tolyloxy)propan-2-ol (7r) in d-CDCl<sub>3</sub> at 25 °C.**

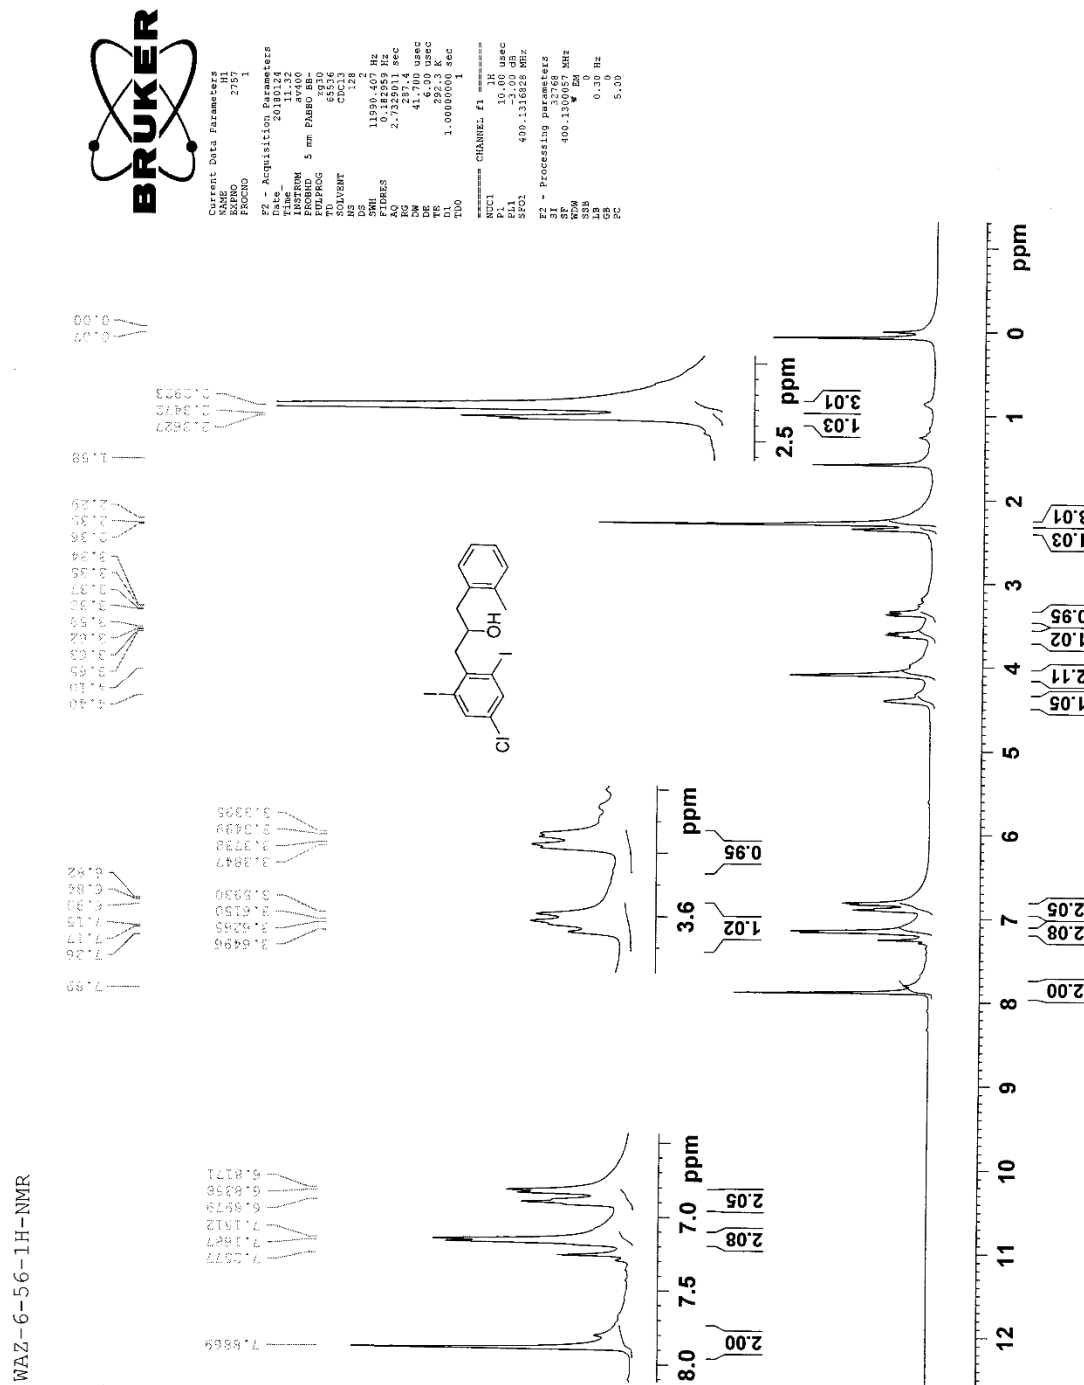

**1.3.36  $^{13}\text{C}$ -NMR of 1-(4-chloro-2,6-diiodophenyl)-3-(o-tolyloxy)propan-2-ol (7r) in  $d\text{-CDCl}_3$  at 25 °C.**

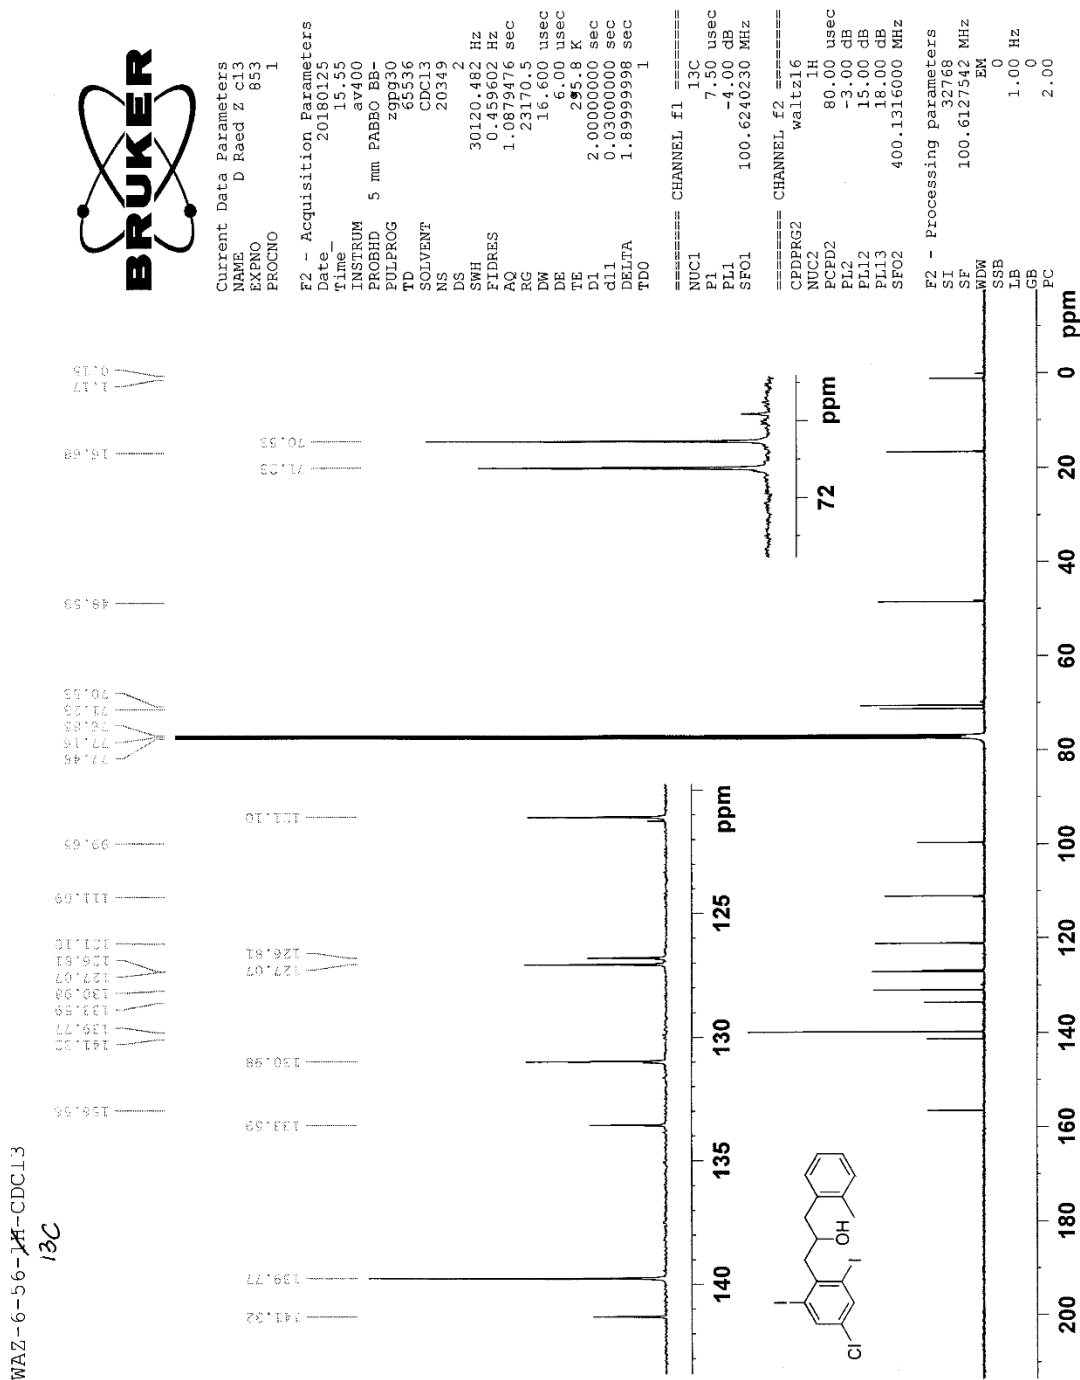

**1.3.37 <sup>1</sup>H-NMR of 1-(4-bromophenoxy)-3-(4-chloro-2,6-diiodophenyl)propan-2-ol (7s) in d-CDCl<sub>3</sub> at 25 °C.**

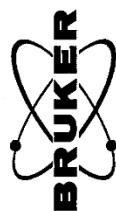

Current Data Parameters  
 NAME: 7s  
 PROCNO: 1661  
 F2 - Acquisition Parameters  
 Date\_ Time: 20160921 16:15  
 PROBHD: 5 mm PABBO BB-  
 PULPROG: zgpg30  
 SOLVENT: CDCl3  
 NS: 92  
 SWH: 11390.407 Hz  
 FIDRES: 0.182659 Hz  
 RG: 256  
 RW: 1.732756 sec  
 DW: 41.700 usec  
 DE: 2.000 usec  
 TE: 285.9 K  
 TD: 1.0000000 sec  
 ===== CHANNEL f1 =====  
 NUC1: 1H  
 P1: 10.00 usec  
 PL: 0.00 dB  
 SFO1: 400.11628 MHz  
 ===== Processing parameters =====  
 SI: 32768  
 SF: 400.1300075 MHz  
 SD: 50  
 SSB: 0  
 LB: 0.30 Hz  
 GB: 0  
 PC: 10.00

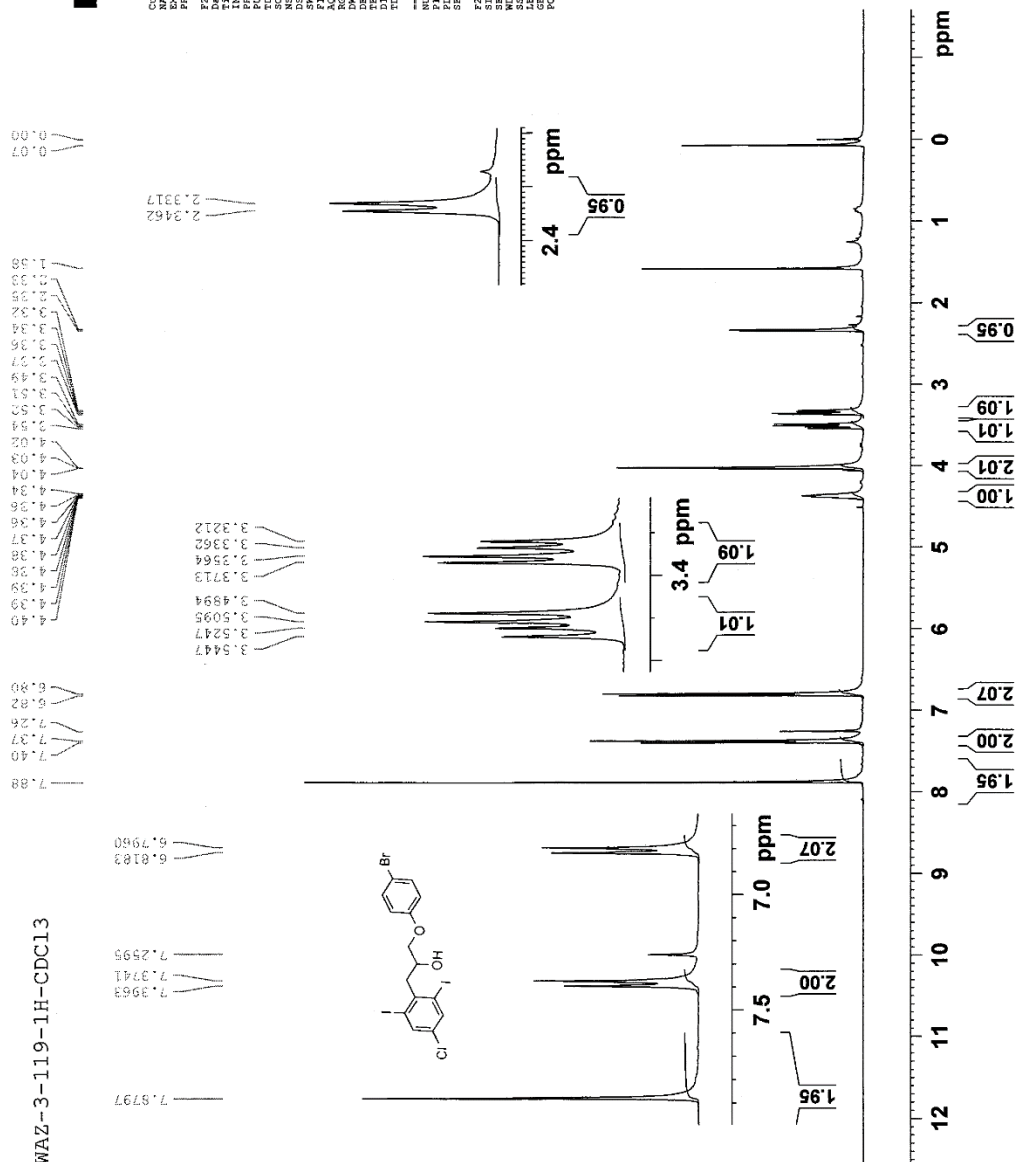

**1.3.38  $^{13}\text{C}$ -NMR of 1-(4-bromophenoxy)-3-(4-chloro-2,6-diiodophenyl)propan-2-ol (7s) in  $d\text{-CDCl}_3$  at 25 °C.**

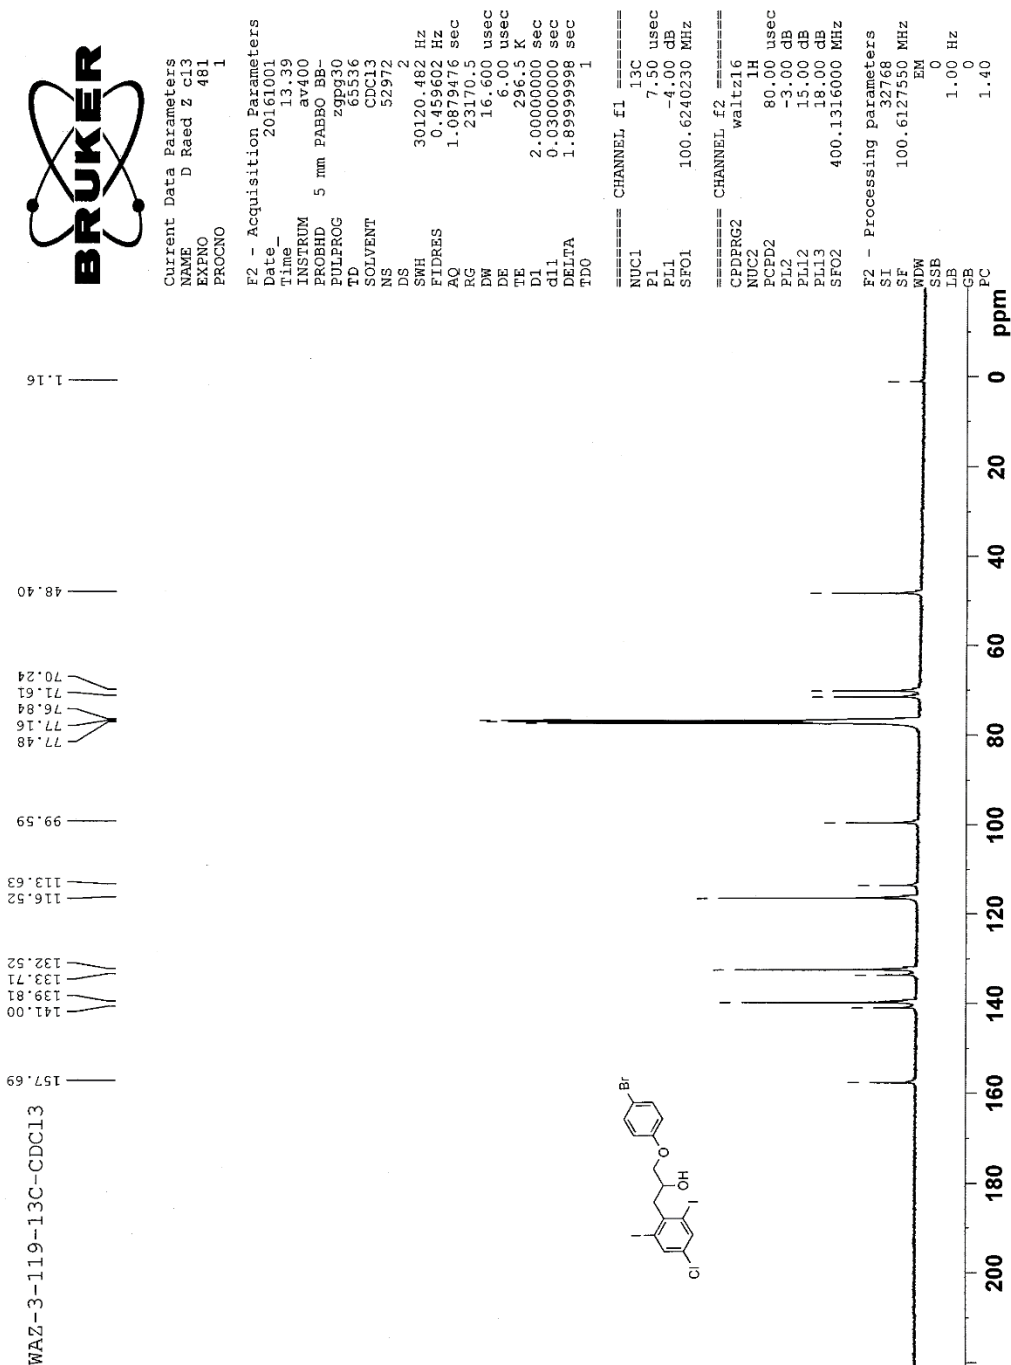

1.3.39 <sup>1</sup>H-NMR of 1-(4-bromo-2,6-diiodophenyl)butan-2-ol (7t) in d-CDCl<sub>3</sub> at 25 °C.

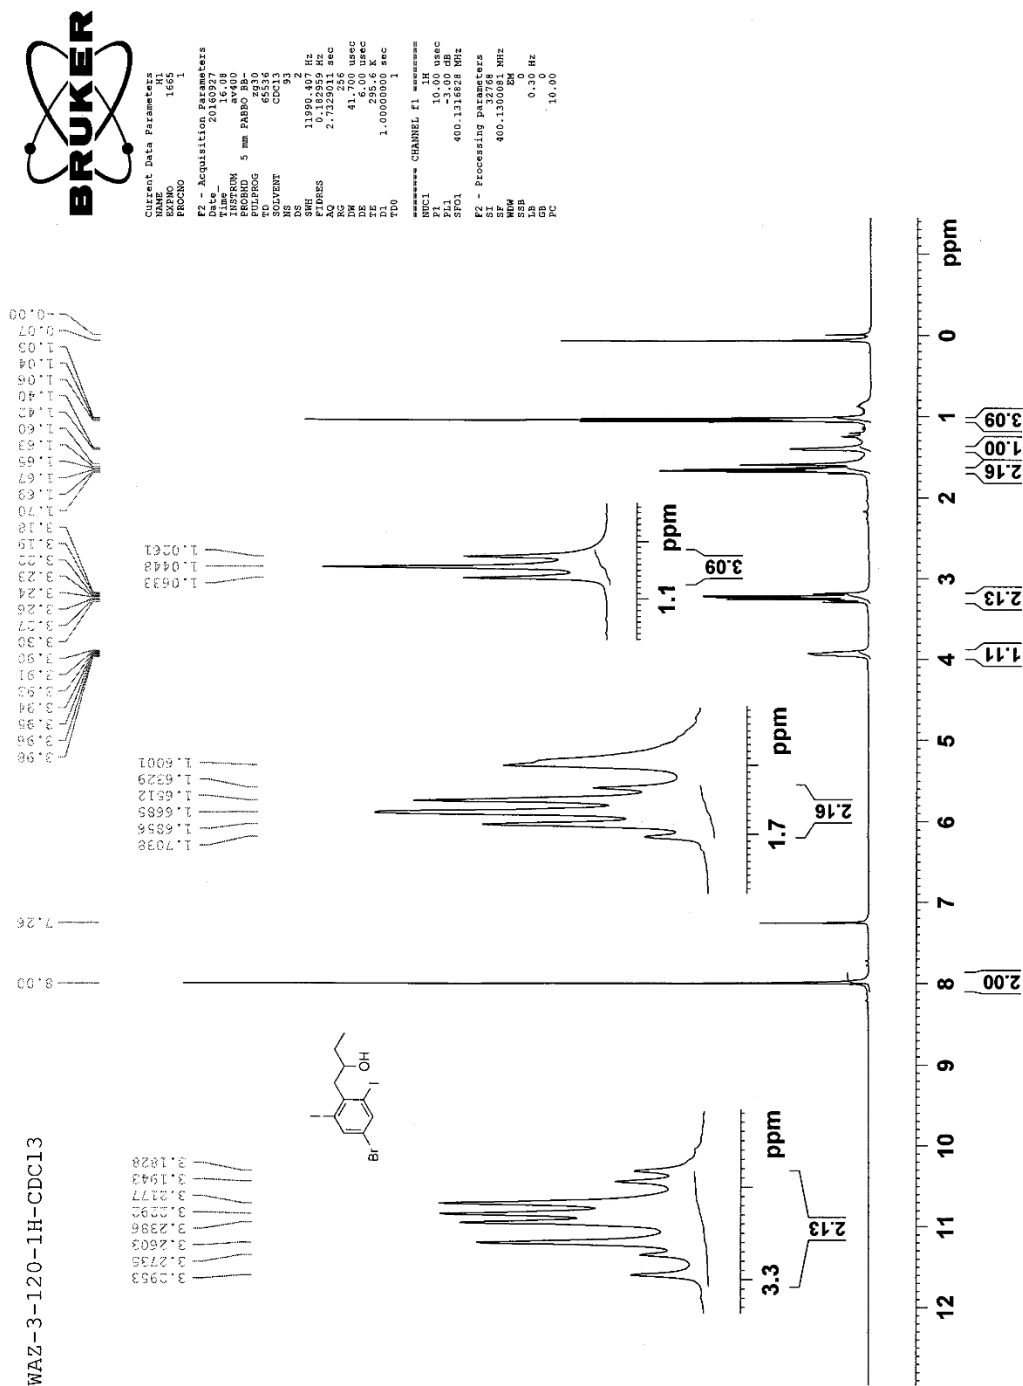



### 1.3.40 $^{13}\text{C}$ -NMR of 1-(4-bromo-2,6-diiodophenyl)butan-2-ol (7t) in $d\text{-CDCl}_3$ at 25 $^\circ\text{C}$ .

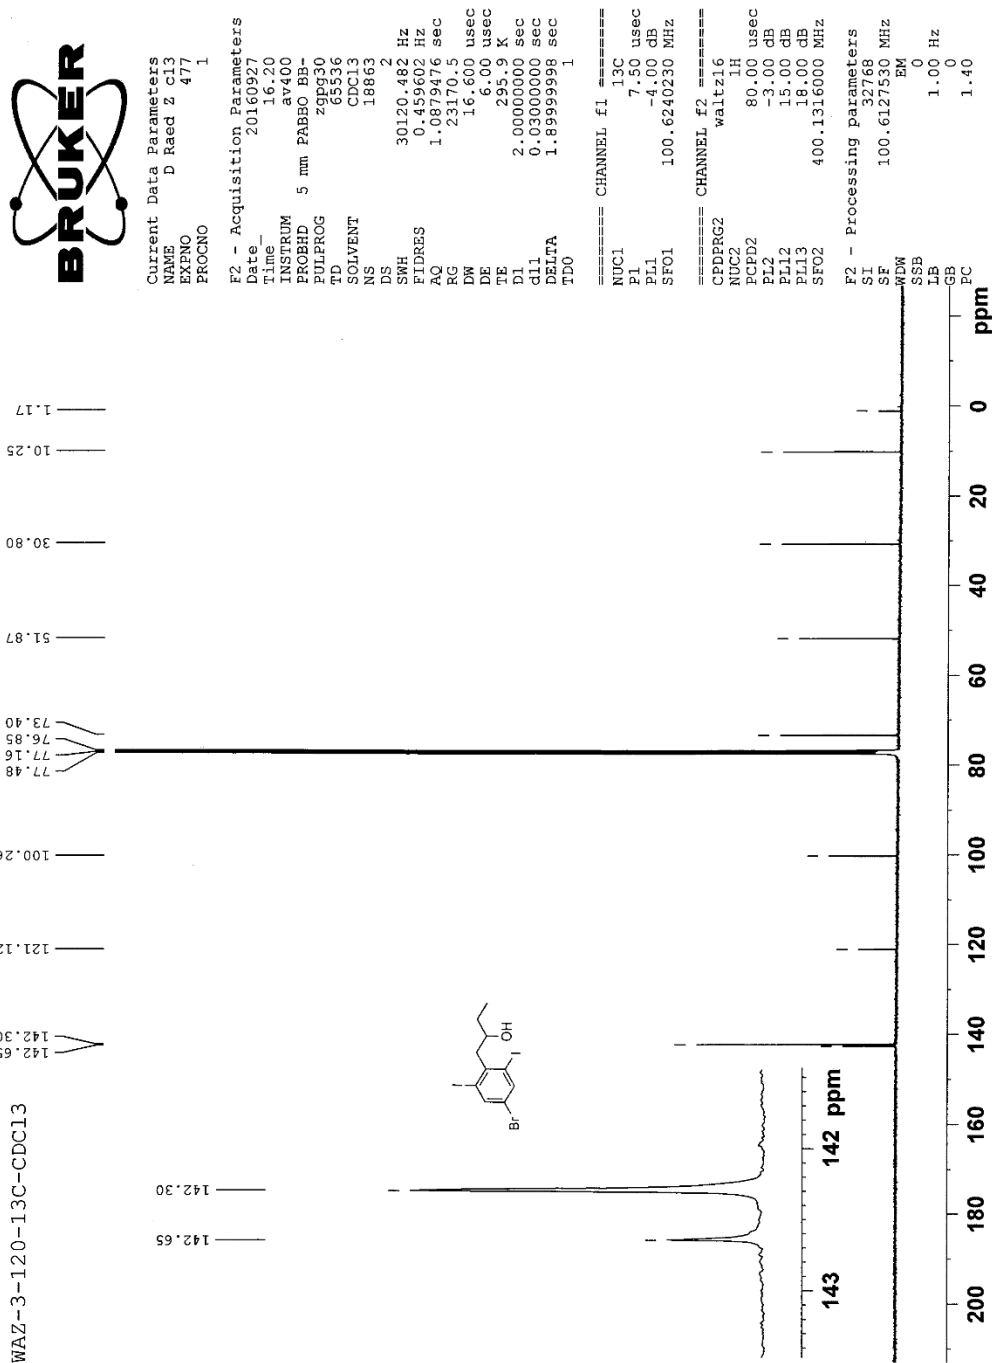

1.3.41 <sup>1</sup>H-NMR of (S)-1-(benzyloxy)-3-(4-bromo-2,6-diiodophenyl)propan-2-ol (7u) in d-CDCl<sub>3</sub> at 25 °C.

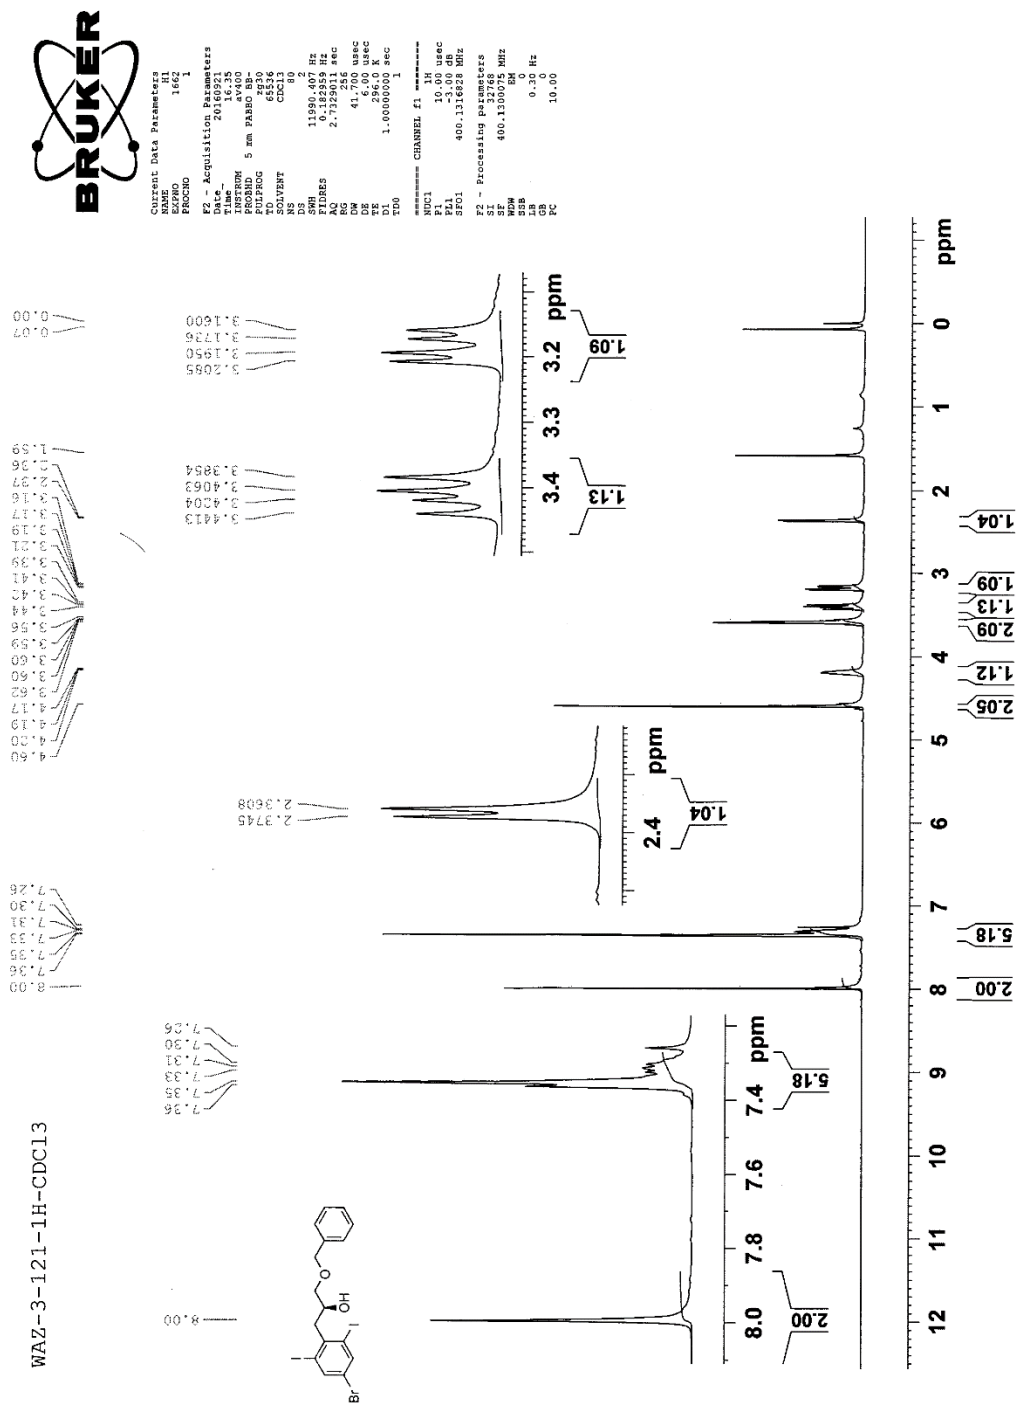

**1.3.42  $^{13}\text{C}$ -NMR of (S)-1-(benzyloxy)-3-(4-bromo-2,6-diiodophenyl)propan-2-ol (7u) in  $d\text{-CDCl}_3$  at 25 °C.**

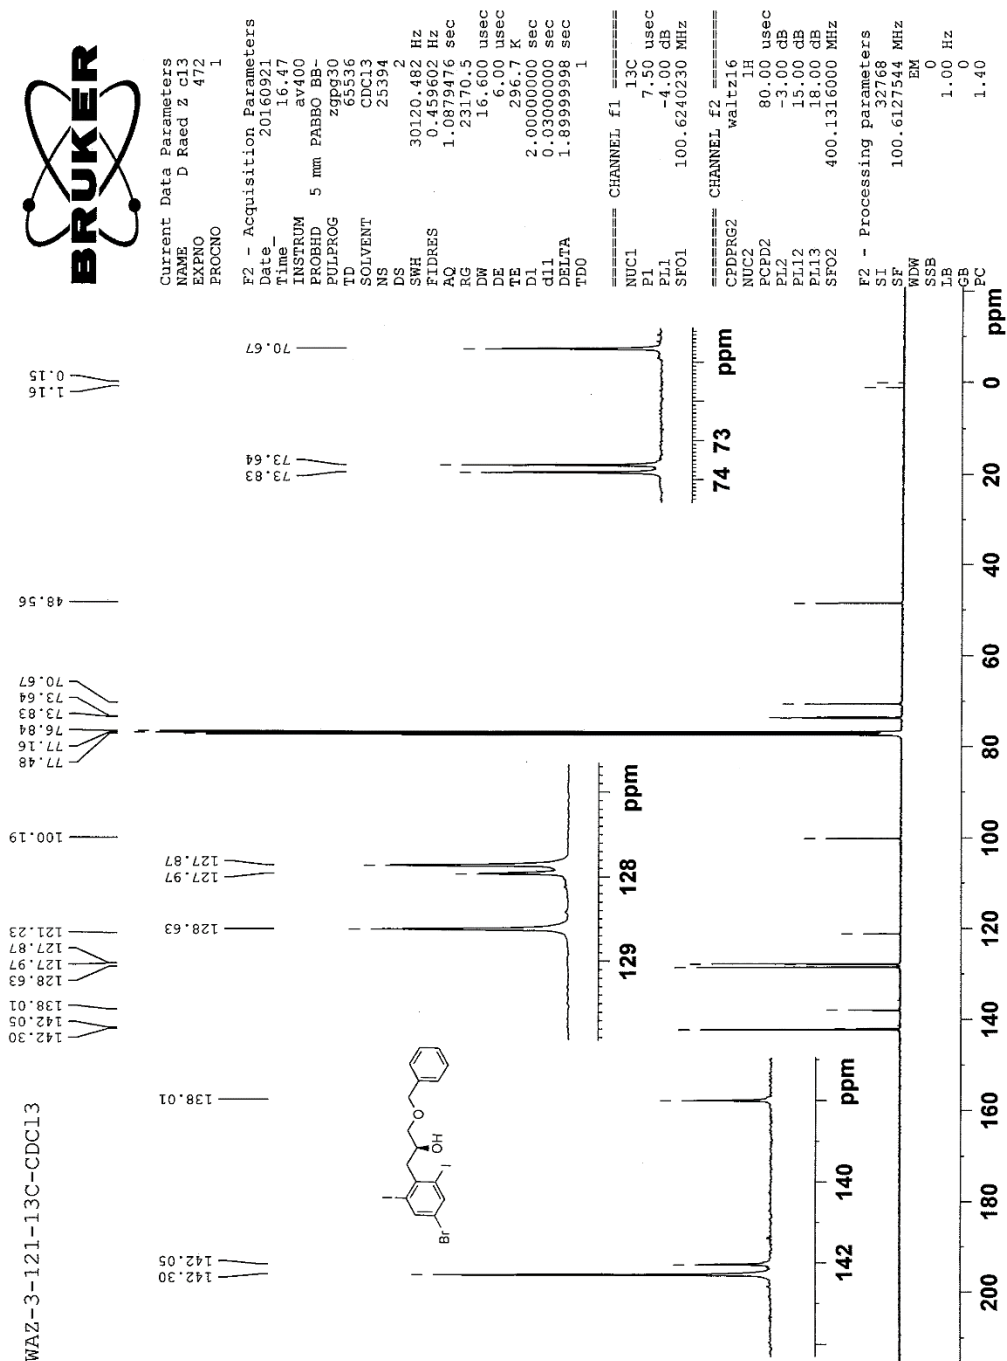



### 1.3.44 $^{13}\text{C}$ -NMR of 1-(2,6-diiodo-4-methoxyphenyl)butan-2-ol (7v) in $d\text{-CDCl}_3$ at 25 °C.

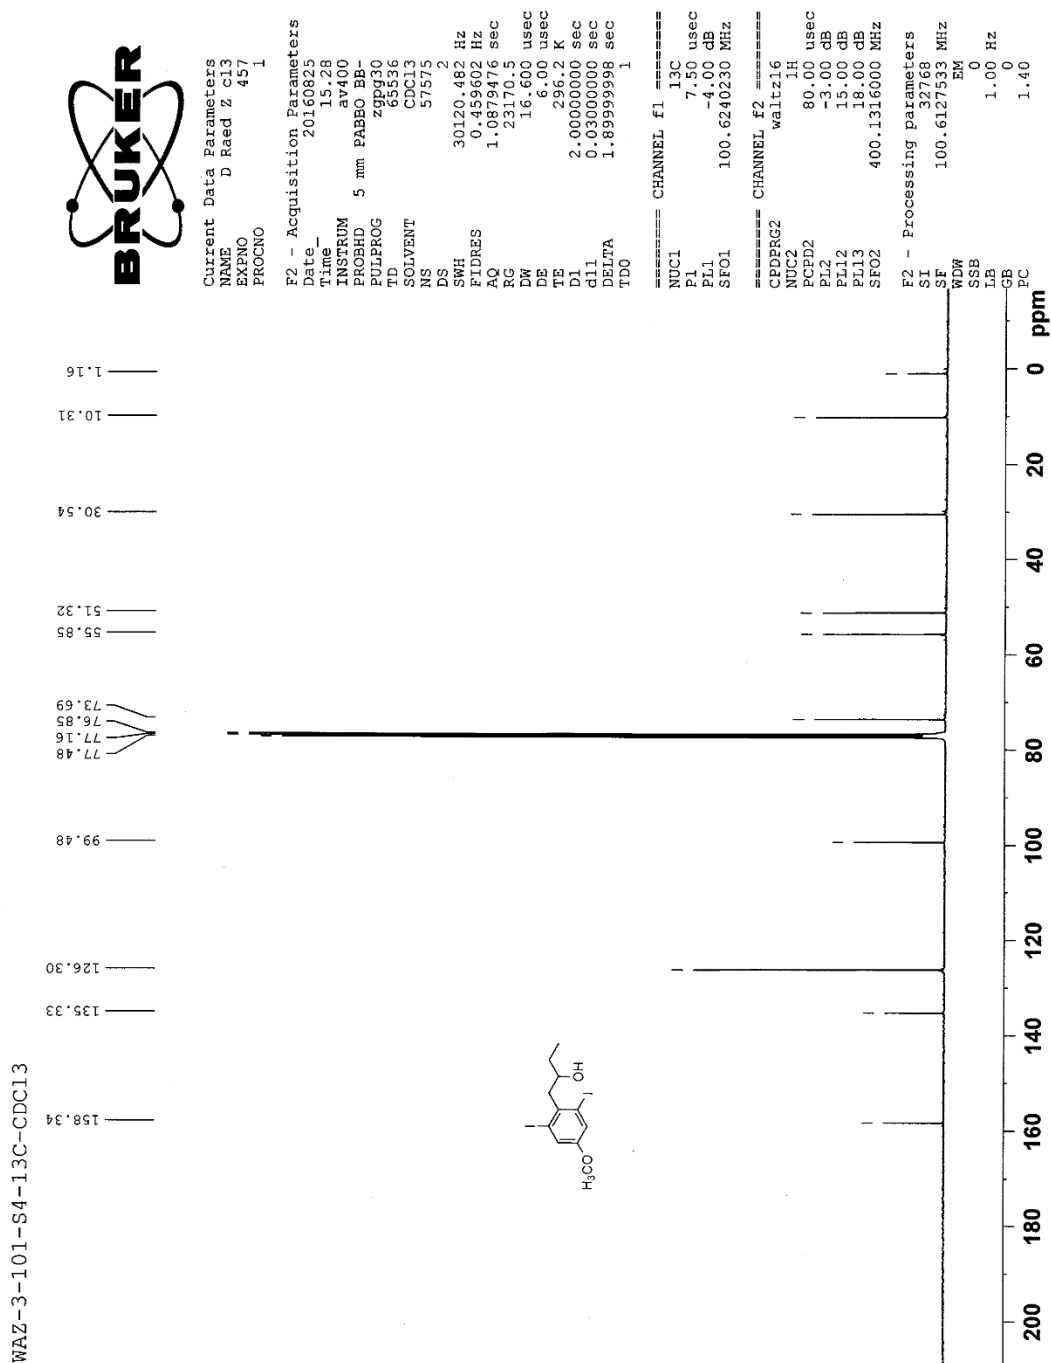

1.3.45 <sup>1</sup>H-NMR of 1-(2,6-diiodo-4-methoxyphenyl)-3-methoxypropan-2-ol (7w) in d-CDCl<sub>3</sub> at 25 °C.

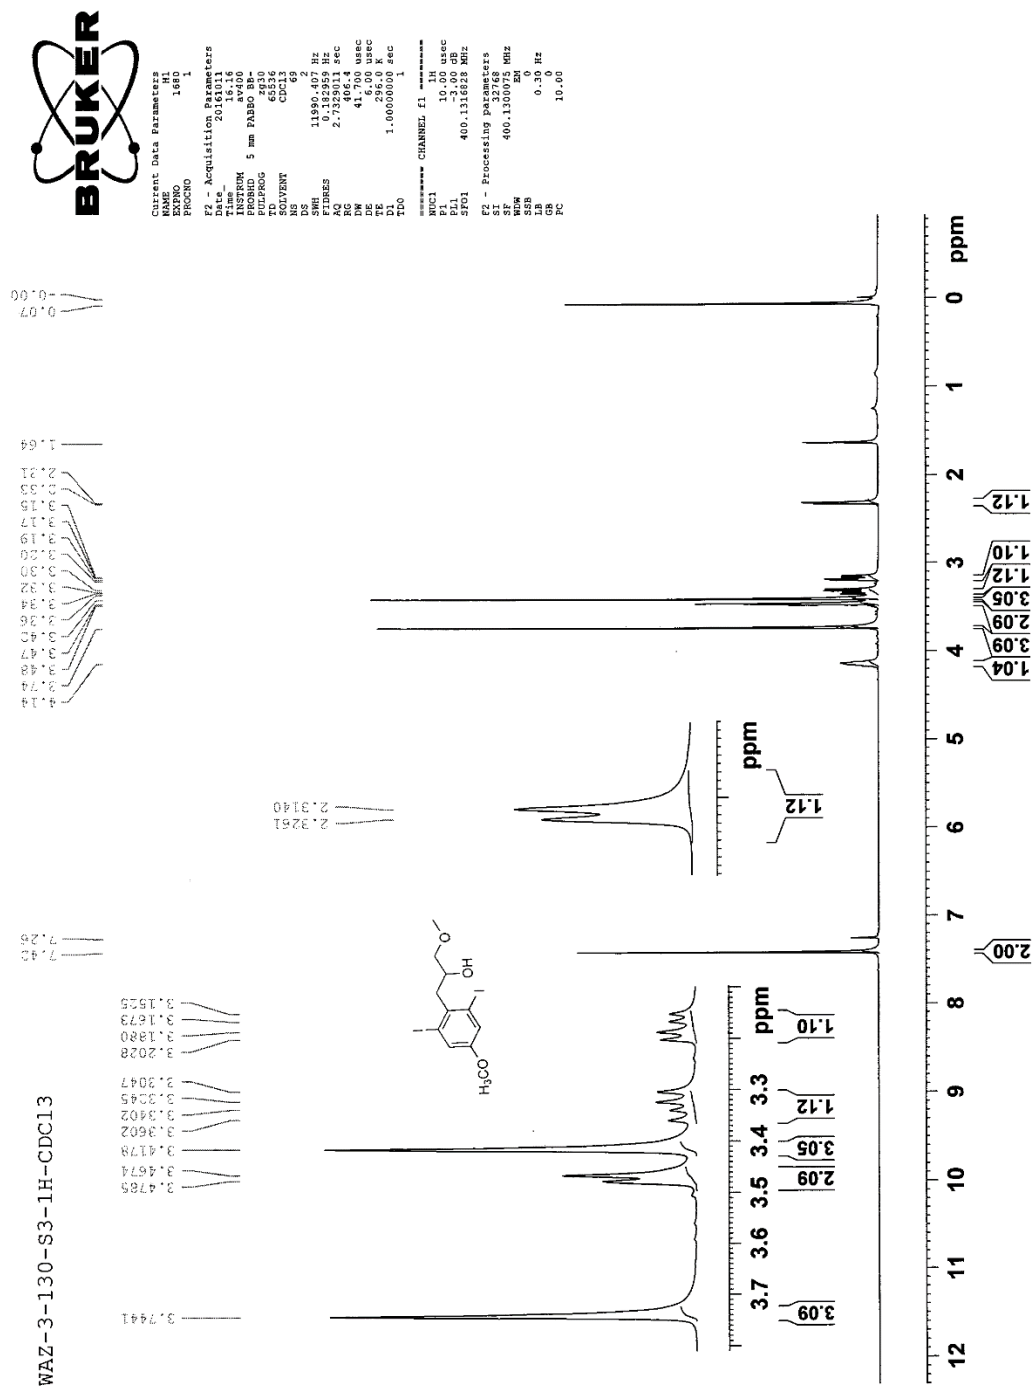

**1.3.46  $^{13}\text{C}$ -NMR of 1-(2,6-diiodo-4-methoxyphenyl)-3-methoxypropan-2-ol (7w) in  $\text{d-CDCl}_3$  at 25 °C.**

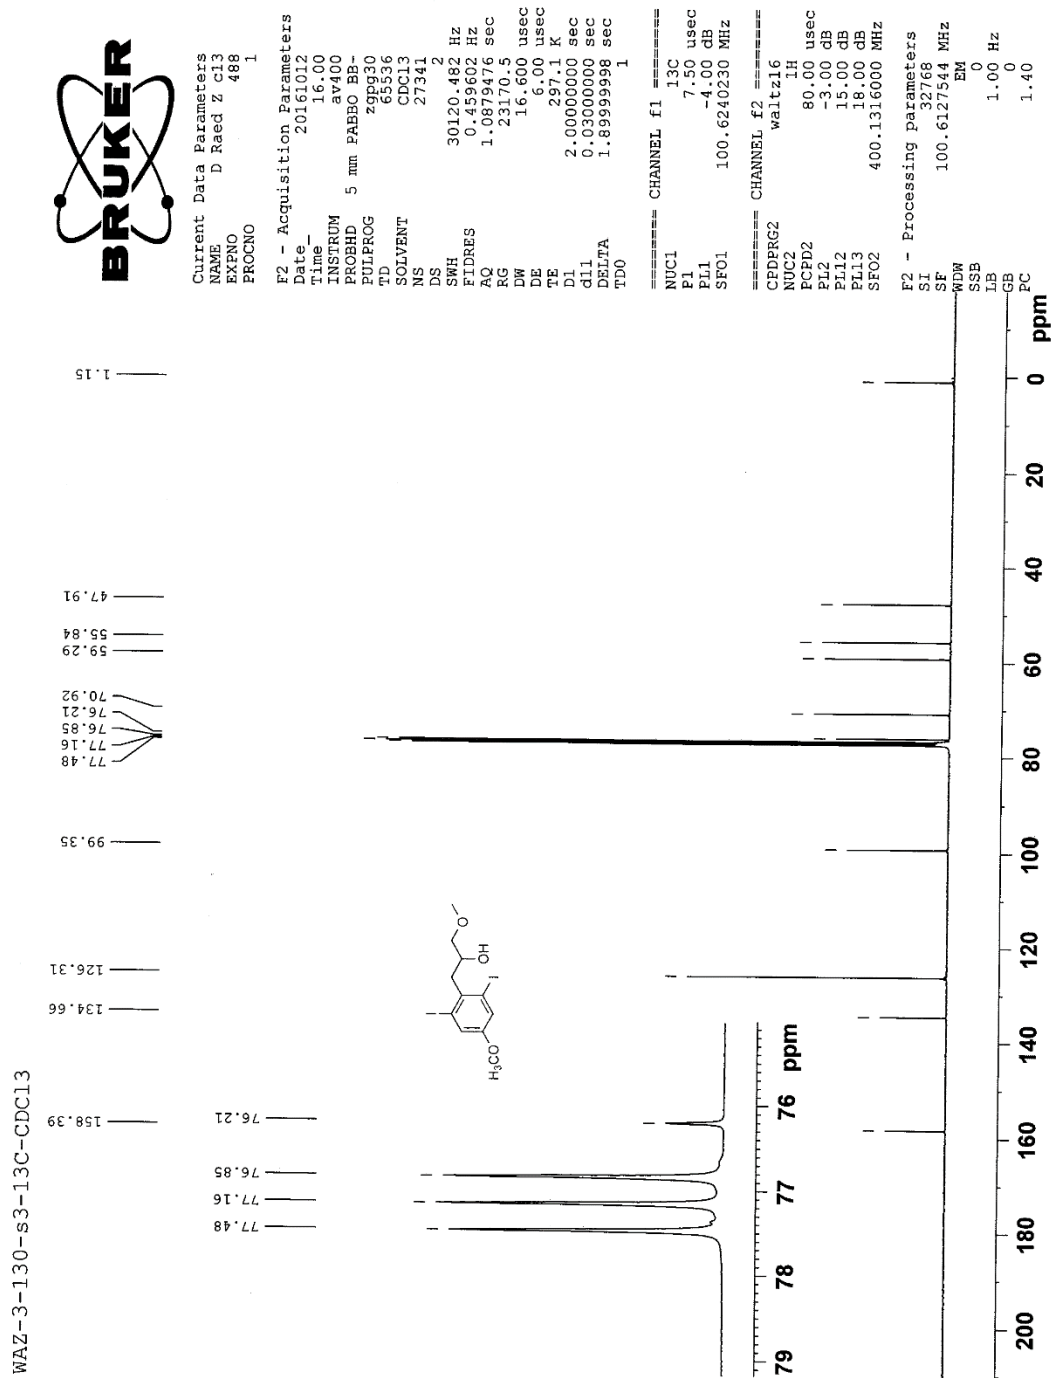

1.3.47 <sup>1</sup>H-NMR of 1-(tert-butoxy)-3-(2,6-diiodo-4-methoxyphenyl)propan-2-ol (7x) in d-CDCl<sub>3</sub> at 25 °C.

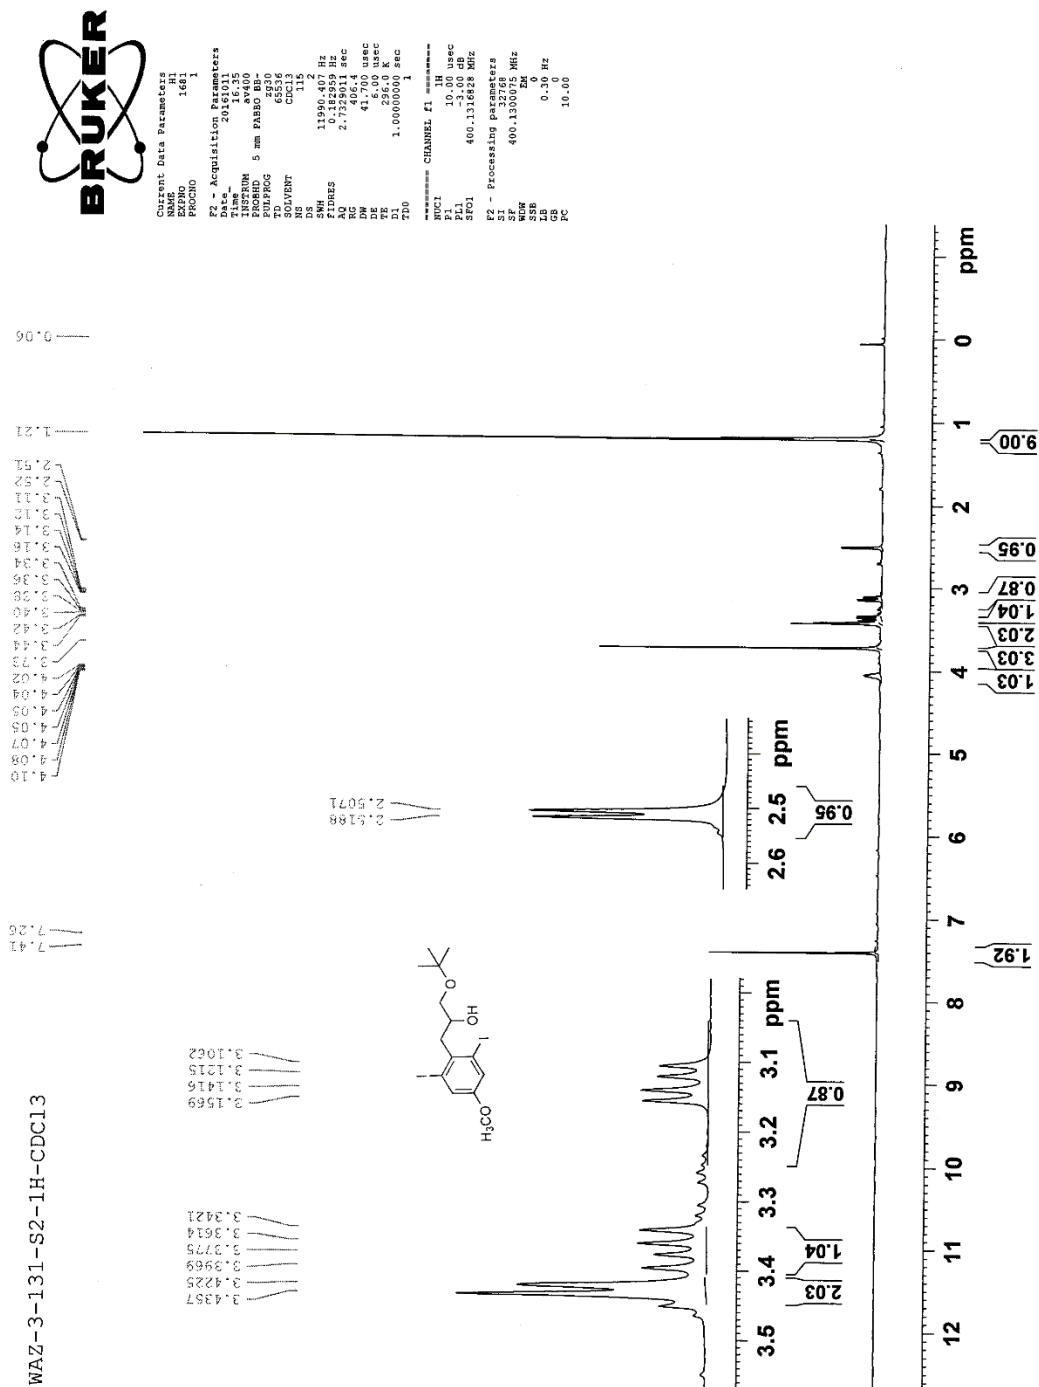



**1.3.48  $^{13}\text{C}$ -NMR of 1-(tert-butoxy)-3-(2,6-diiodo-4-methoxyphenyl)propan-2-ol (7x) in  $d\text{-CDCl}_3$  at 25 °C.**

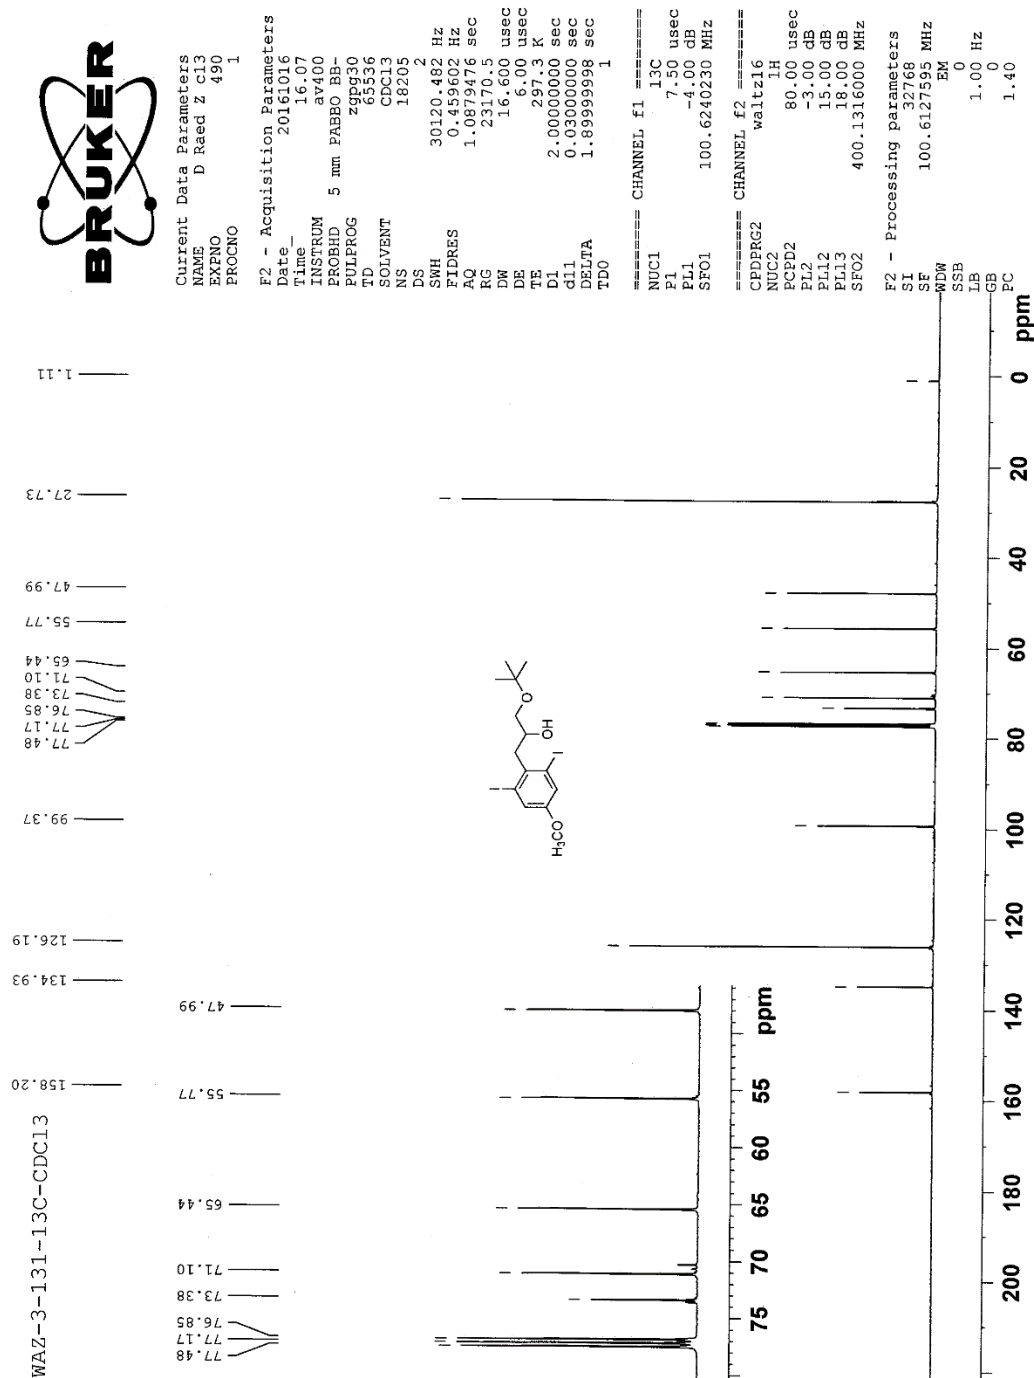

1.3.49 <sup>1</sup>H-NMR of 2-(2,6-diiodo-4-methoxyphenyl)-1-phenylethan-1-ol (7y) in d-CDCl<sub>3</sub> at 25 °C.

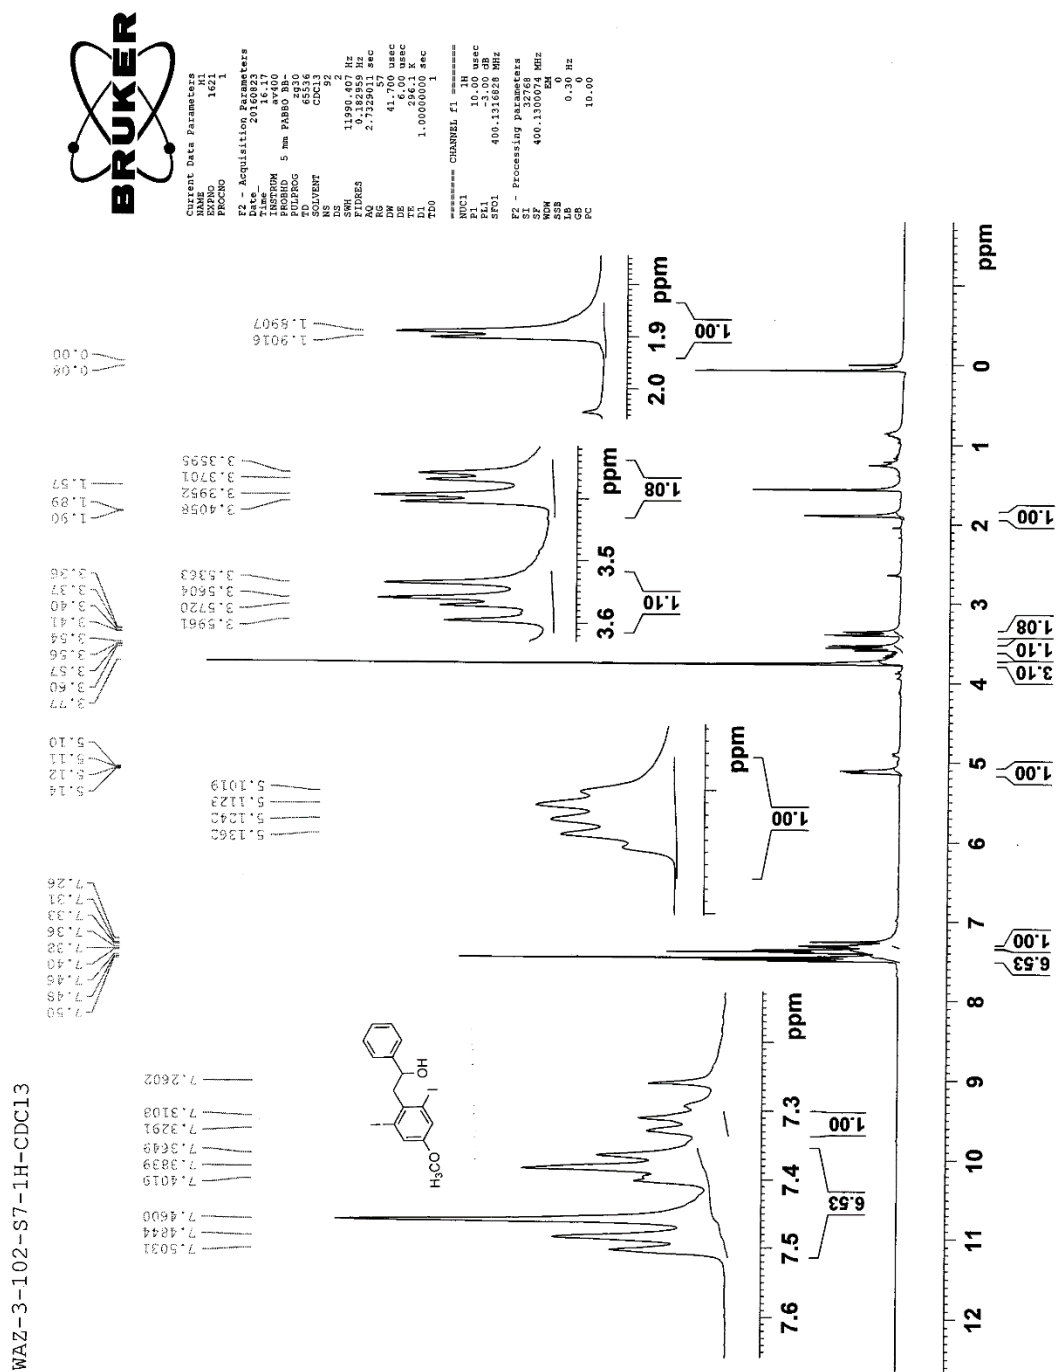

### 1.3.50 $^{13}\text{C}$ -NMR of 2-(2,6-diiodo-4-methoxyphenyl)-1-phenylethan-1-ol (7y) in $d\text{-CDCl}_3$ at 25 °C.

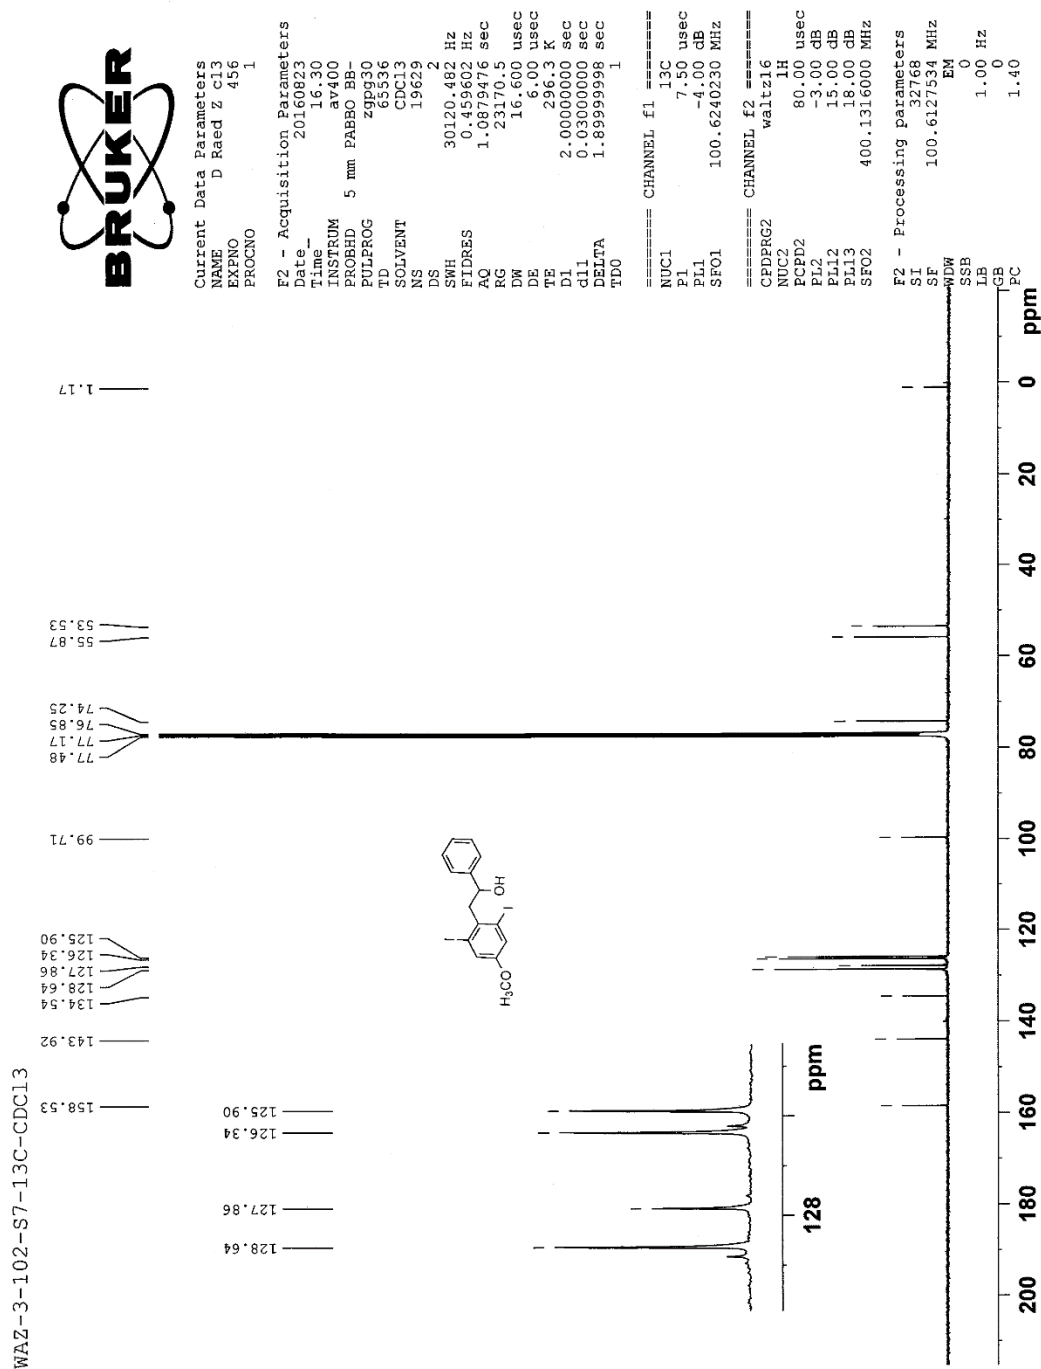

1.3.51 <sup>1</sup>H-NMR of (S)-1-(benzyloxy)-3-(2,6-diiodo-4-methoxyphenyl)propan-2-ol (7z) in d-CDCl<sub>3</sub> at 25 °C.

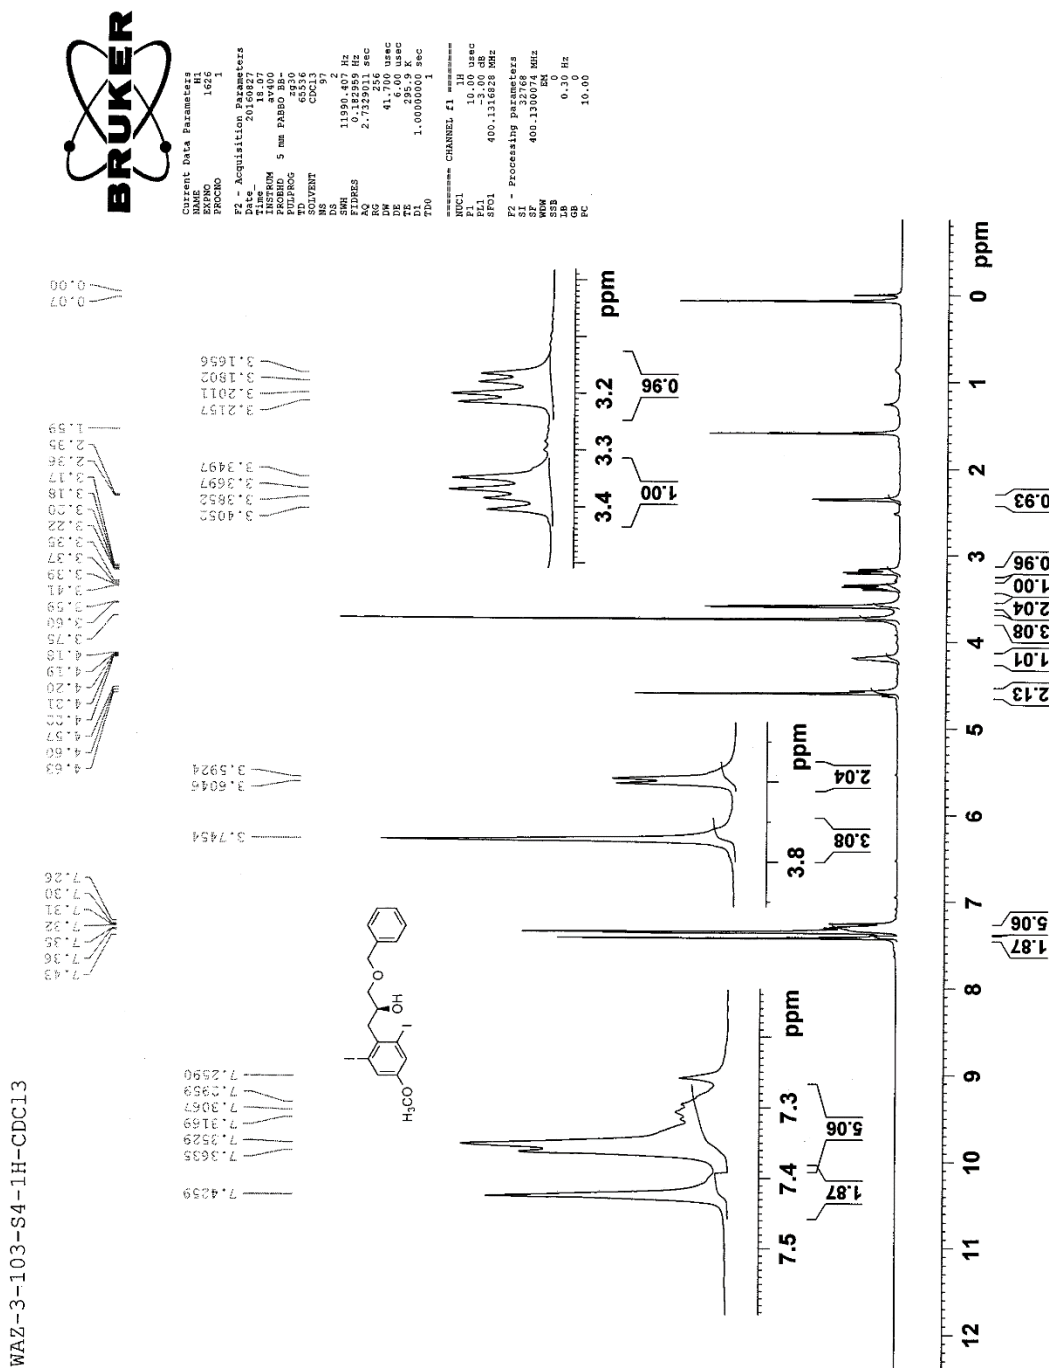

**1.3.52  $^{13}\text{C}$ -NMR of (S)-1-(benzyloxy)-3-(2,6-diiodo-4-methoxyphenyl)propan-2-ol (7z) in  $d\text{-CDCl}_3$  at 25  $^\circ\text{C}$ .**

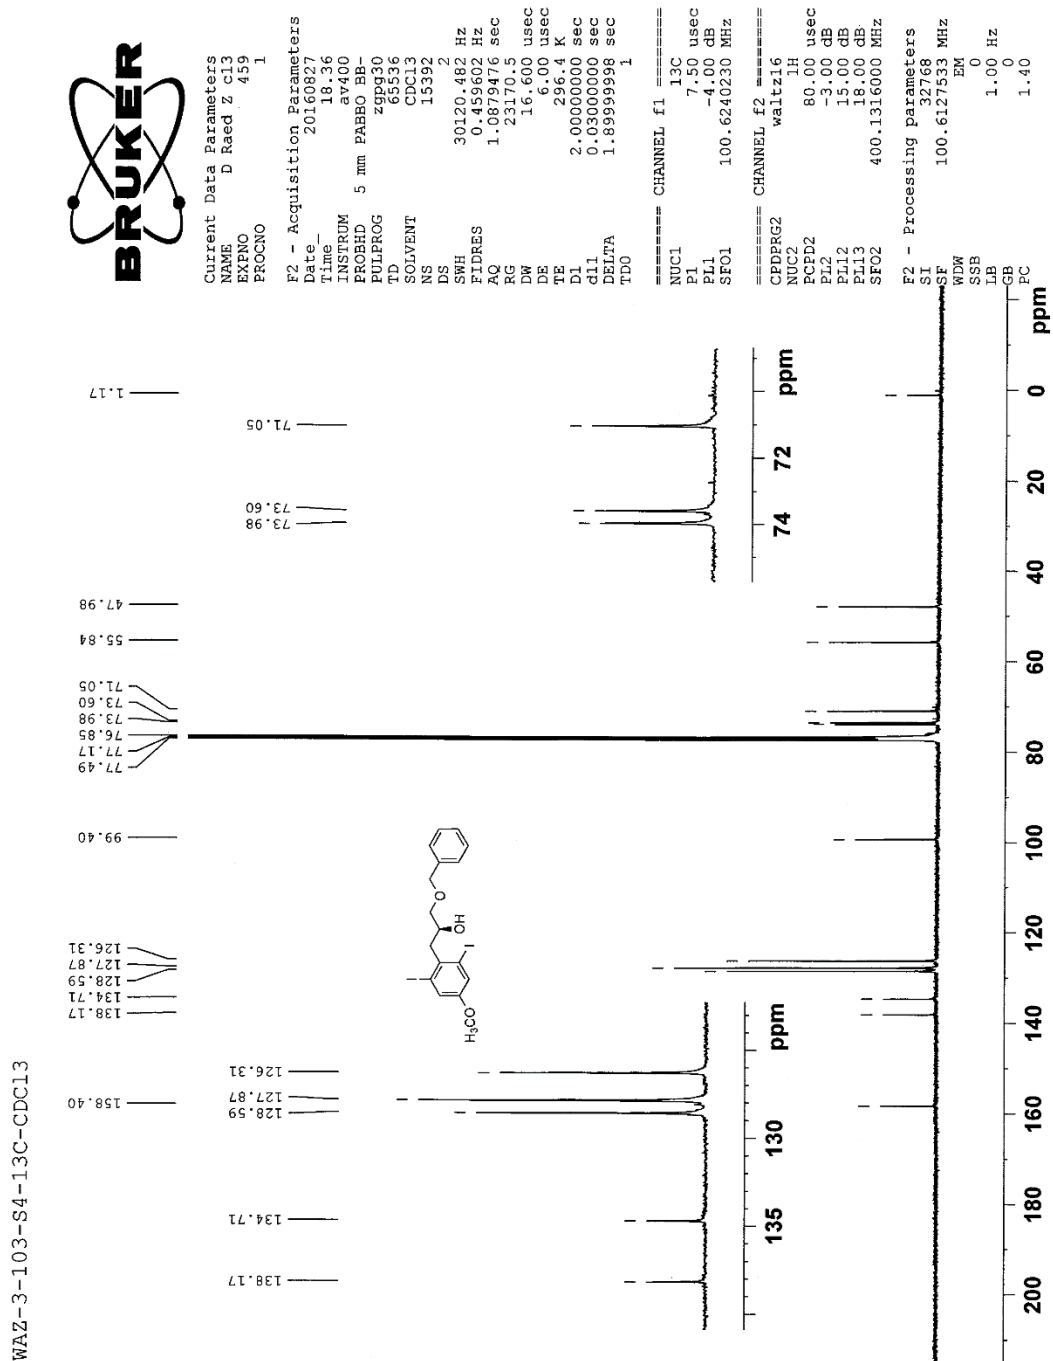

### 1.3.53 $^1\text{H-NMR}$ of 1-(2,6-diiodo-4-methoxyphenyl)-3-(2-methoxyphenoxy)propan-2-ol (7aa) in $d\text{-CDCl}_3$ at 25 °C.

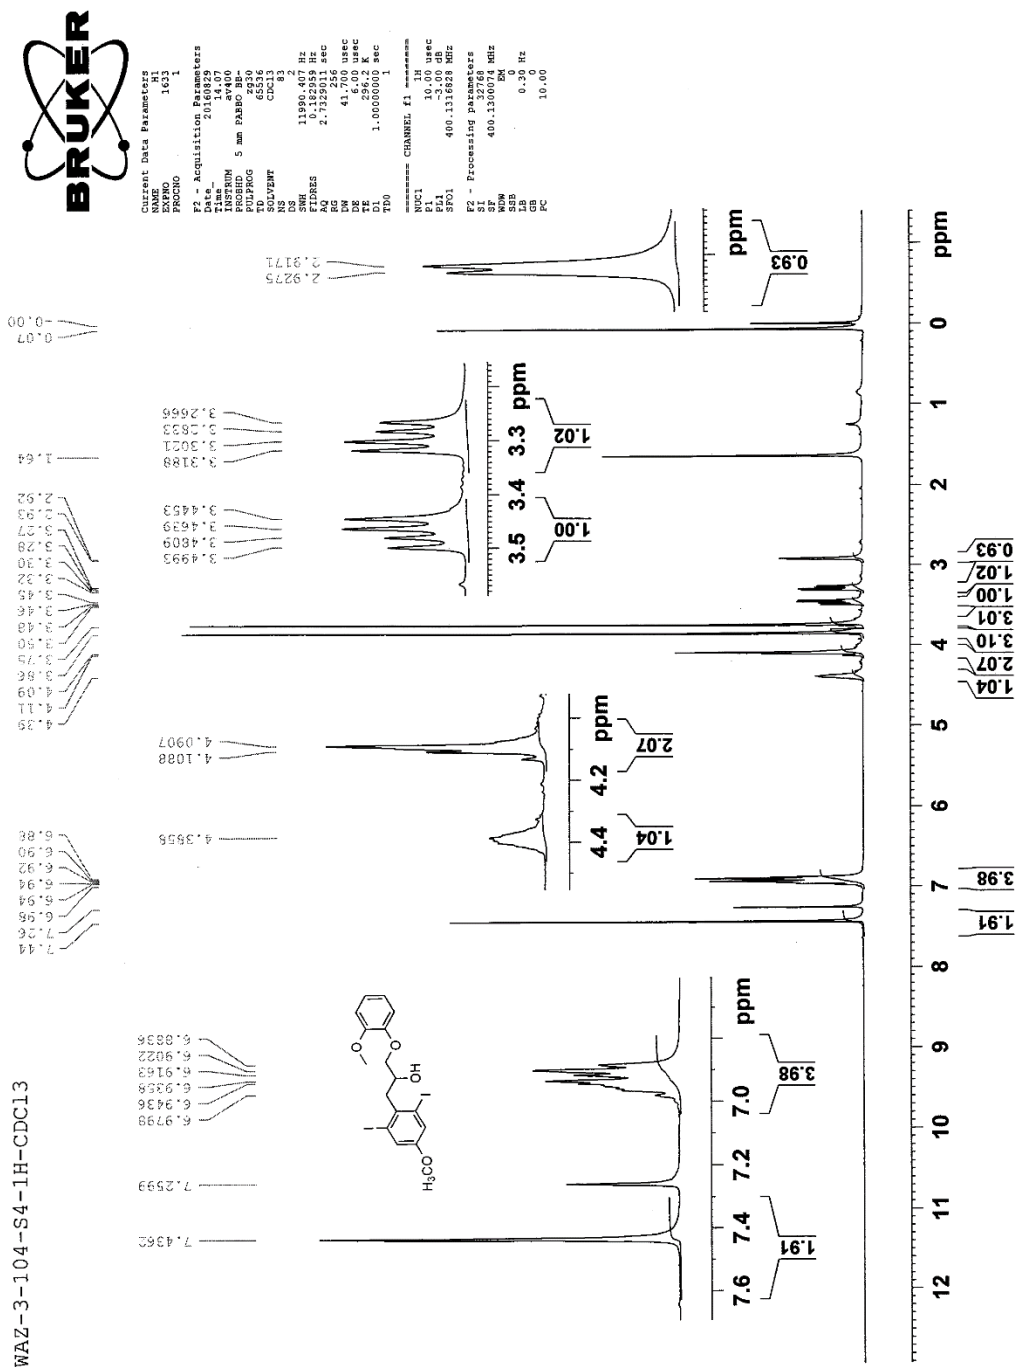

**1.3.54  $^{13}\text{C}$ -NMR of 1-(2,6-diiodo-4-methoxyphenyl)-3-(2-methoxyphenoxy)propan-2-ol (7aa) in  $d\text{-CDCl}_3$  at 25 °C.**

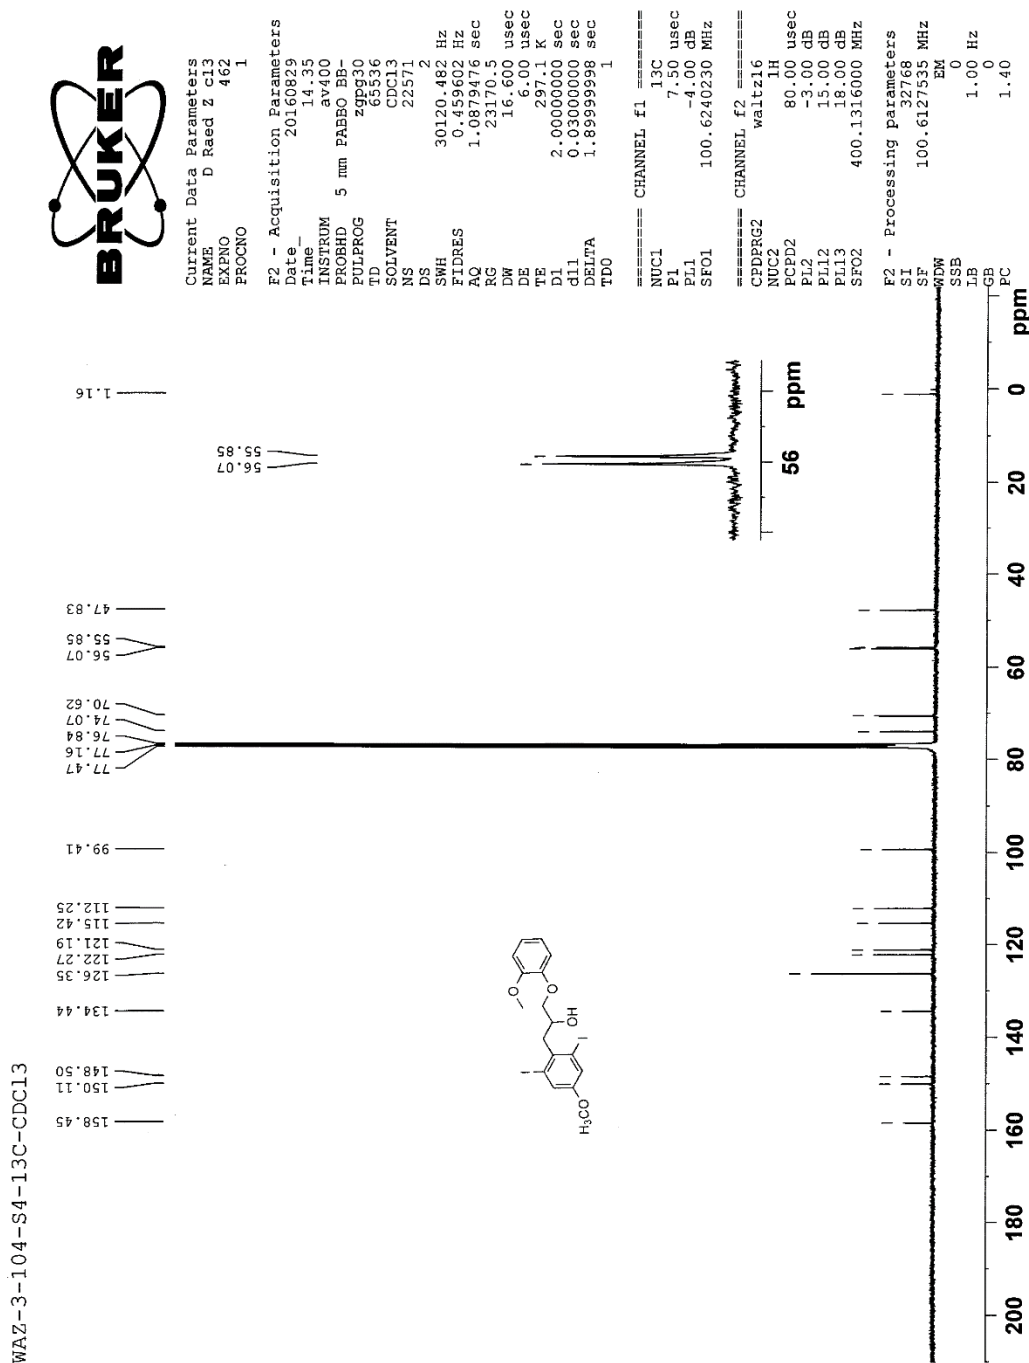

**1.3.55 <sup>1</sup>H-NMR of 1-(4-bromophenoxy)-3-(2,6-diiodo-4-methoxyphenyl) propan-2-ol (7ab) in d-CDCl<sub>3</sub> at 25 °C.**

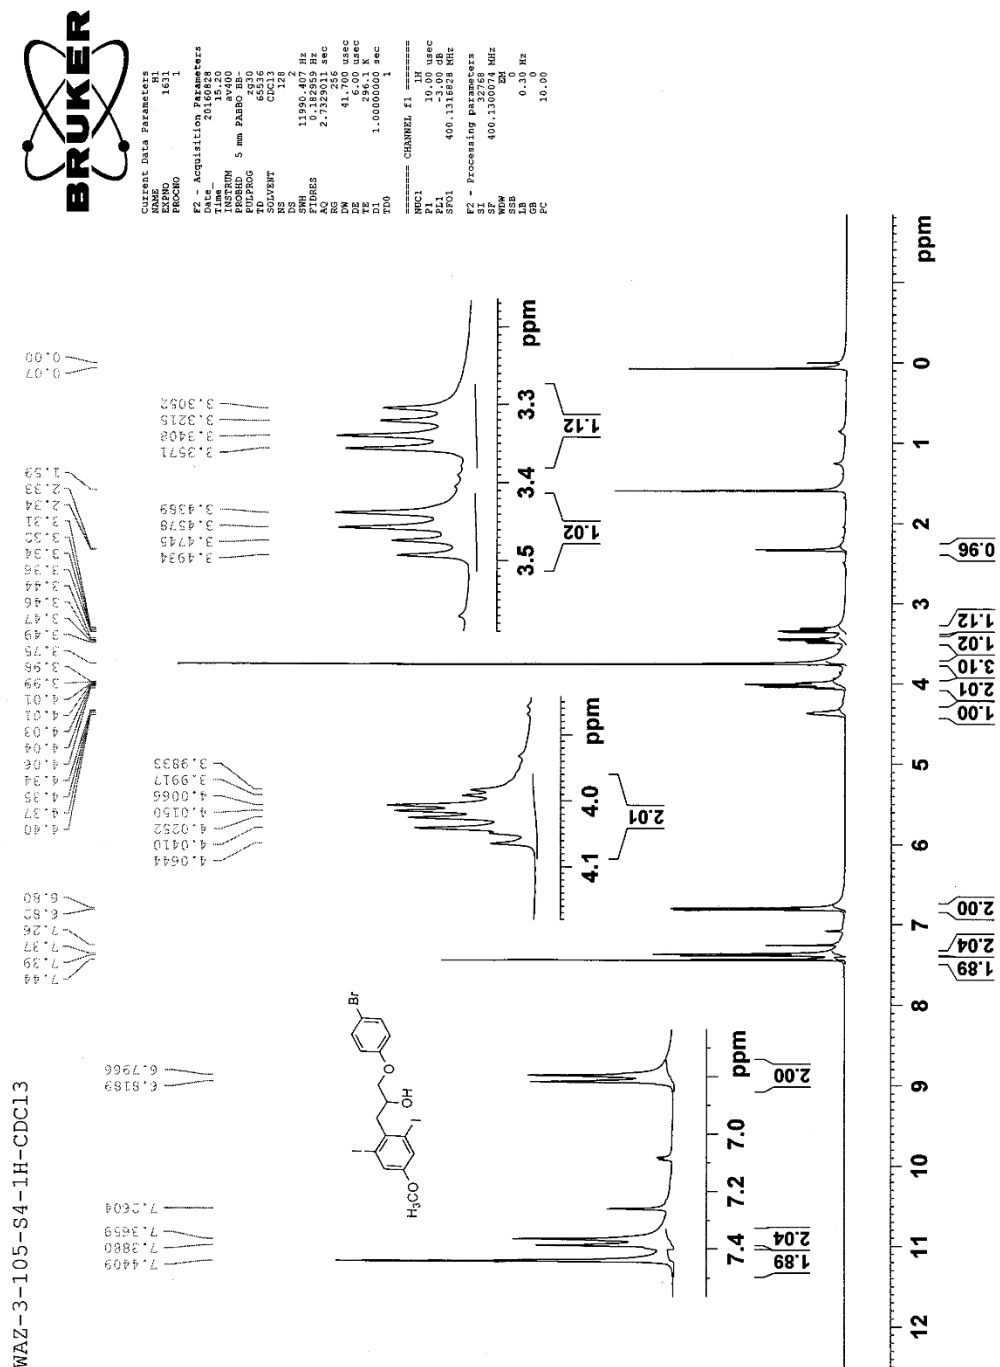



**1.3.56  $^{13}\text{C}$ -NMR of 1-(4-bromophenoxy)-3-(2,6-diiodo-4-methoxyphenyl) propan-2-ol (7ab) in  $d\text{-CDCl}_3$  at 25 °C.**

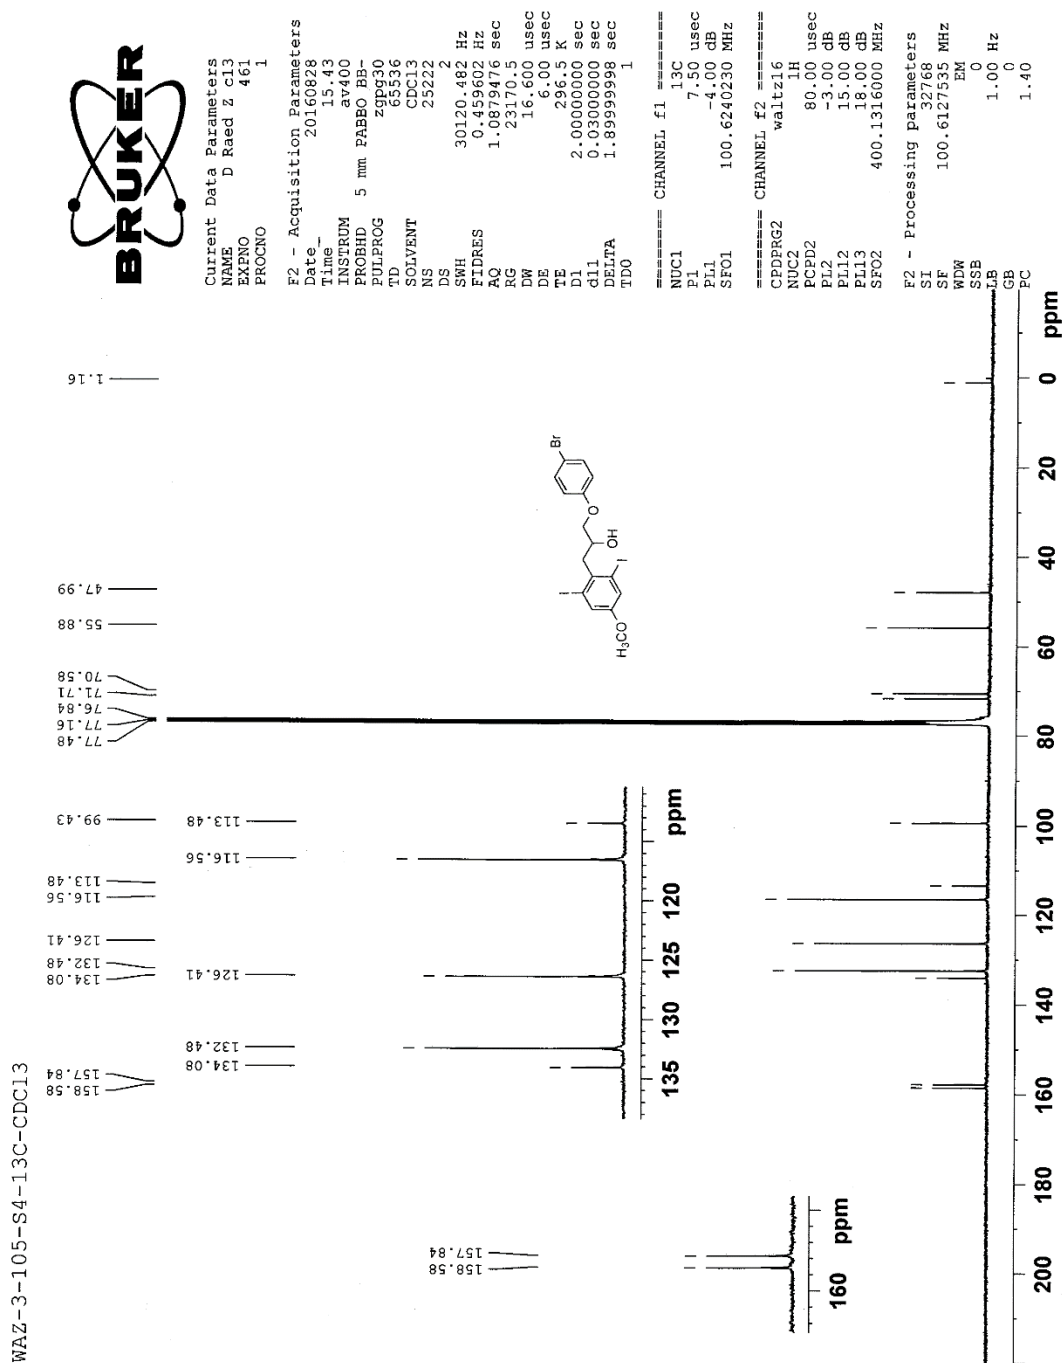

1.3.57 <sup>1</sup>H-NMR of ethyl 3-(2,6-diiodo-4-methoxyphenyl)-2-hydroxypropanoate (7ac) in d-CDCl<sub>3</sub> at 25 °C.

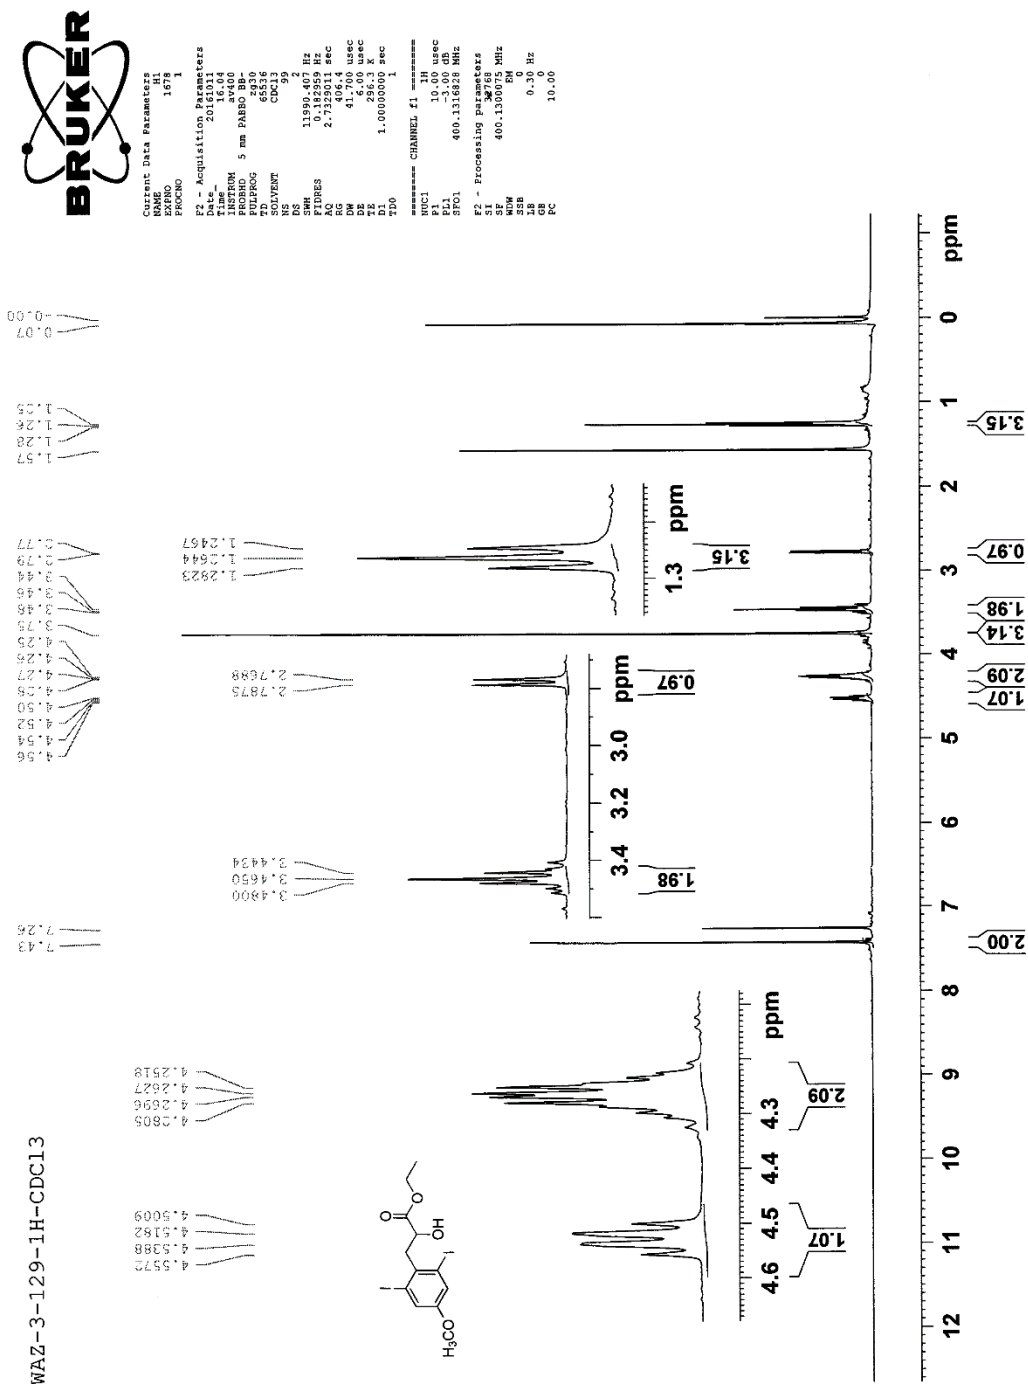

### 1.3.58 $^{13}\text{C}$ -NMR of ethyl 3-(2,6-diiodo-4-methoxyphenyl)-2-hydroxypropanoate (7ac) in $d\text{-CDCl}_3$ at 25 °C.

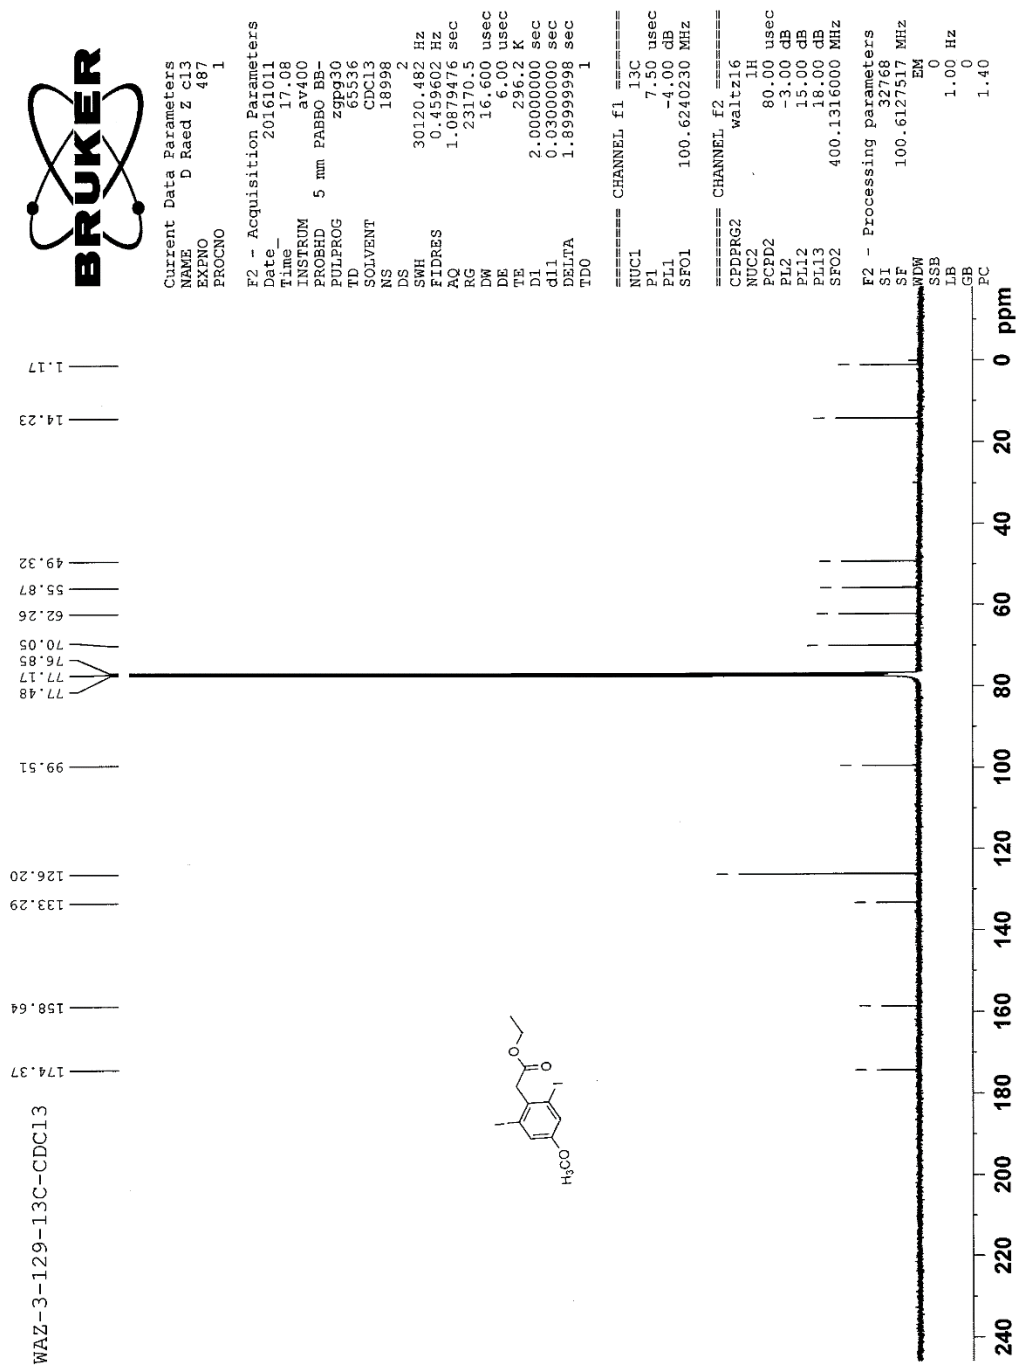

1.3.59 <sup>1</sup>H-NMR of methyl 4-(2-hydroxybutyl)-3,5-diiodobenzoate (7ad) in d-CDCl<sub>3</sub> at 25 °C.

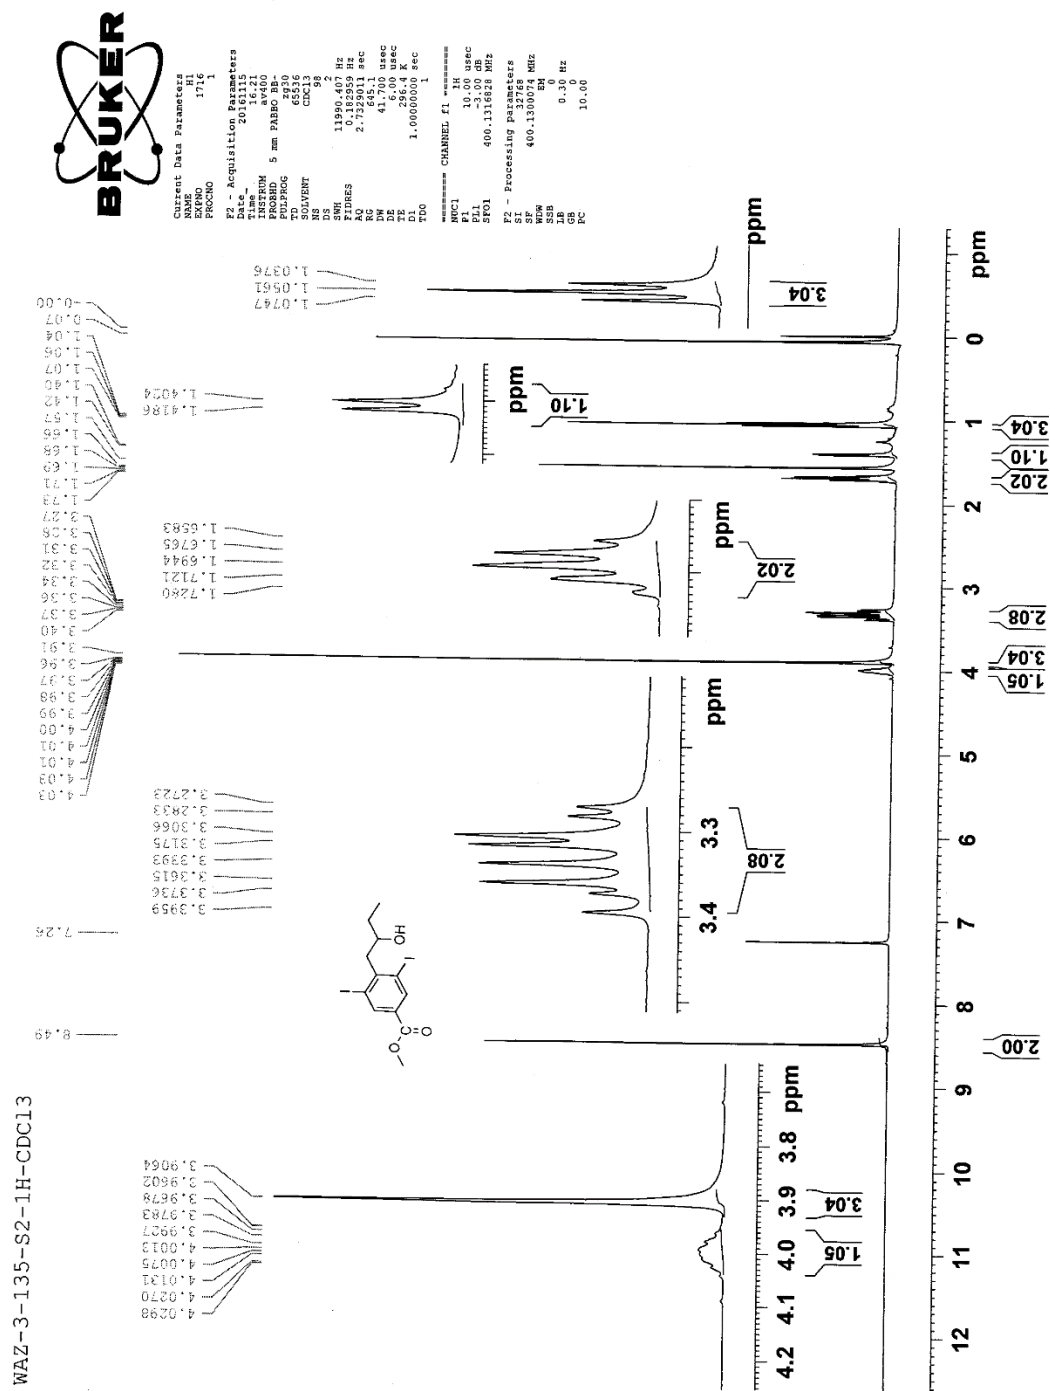

### 1.3.60 $^{13}\text{C}$ -NMR of methyl 4-(2-hydroxybutyl)-3,5-diiodobenzoate (7ad) in $d\text{-CDCl}_3$ at 25 °C.

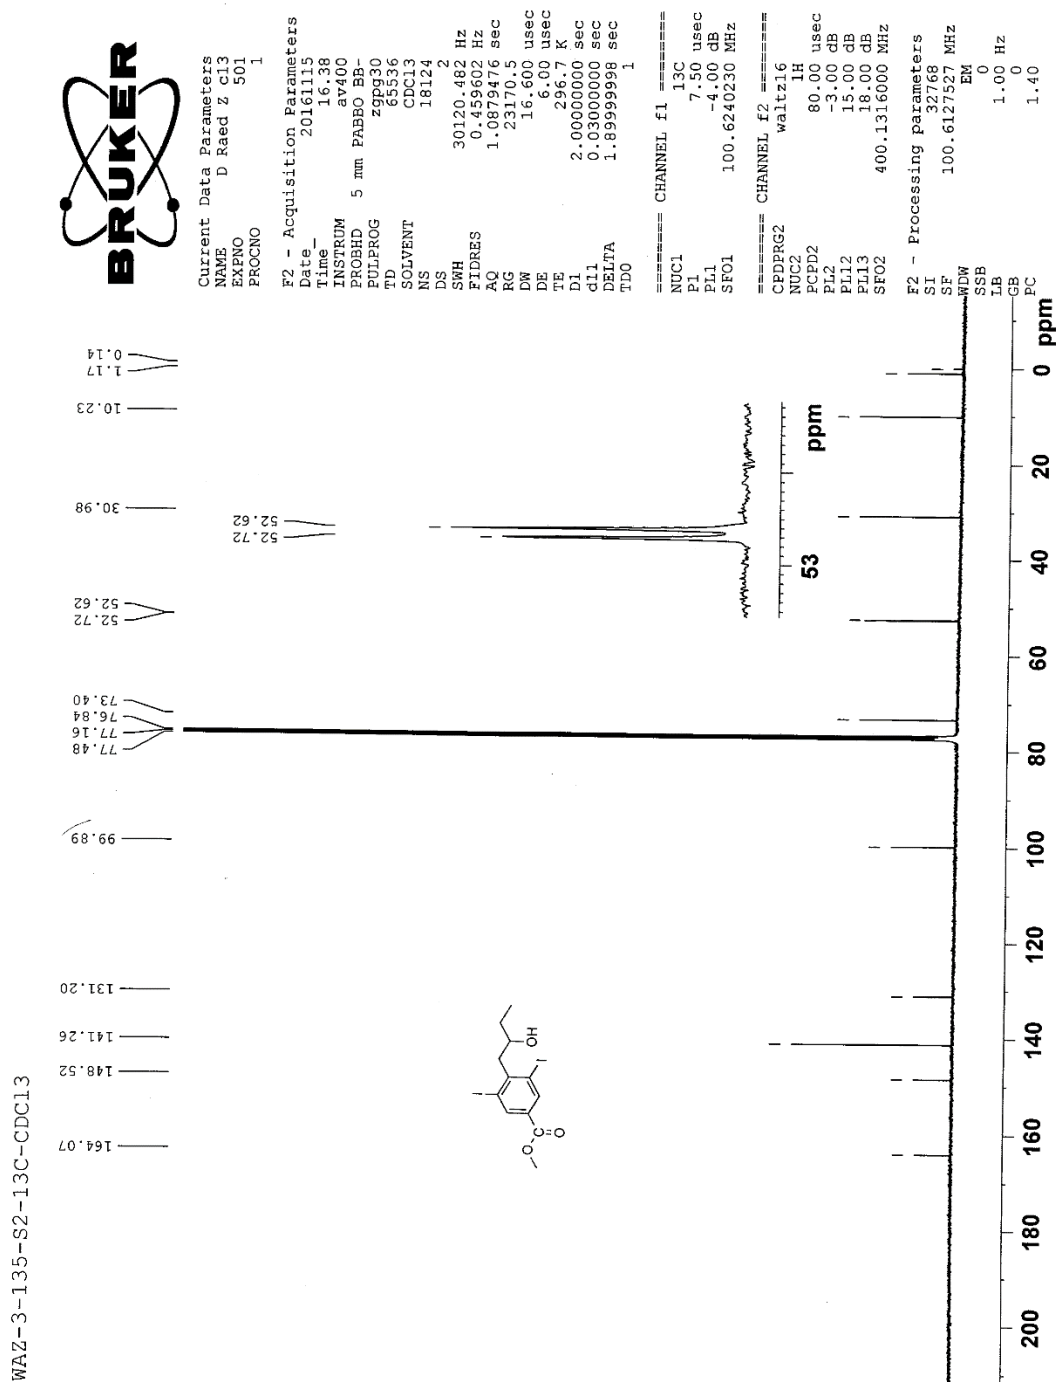

1.3.61 <sup>1</sup>H-NMR of 1-(2-chloro-6-iodophenyl)butan-2-ol (7ae) in d-CDCl<sub>3</sub> at 25 °C.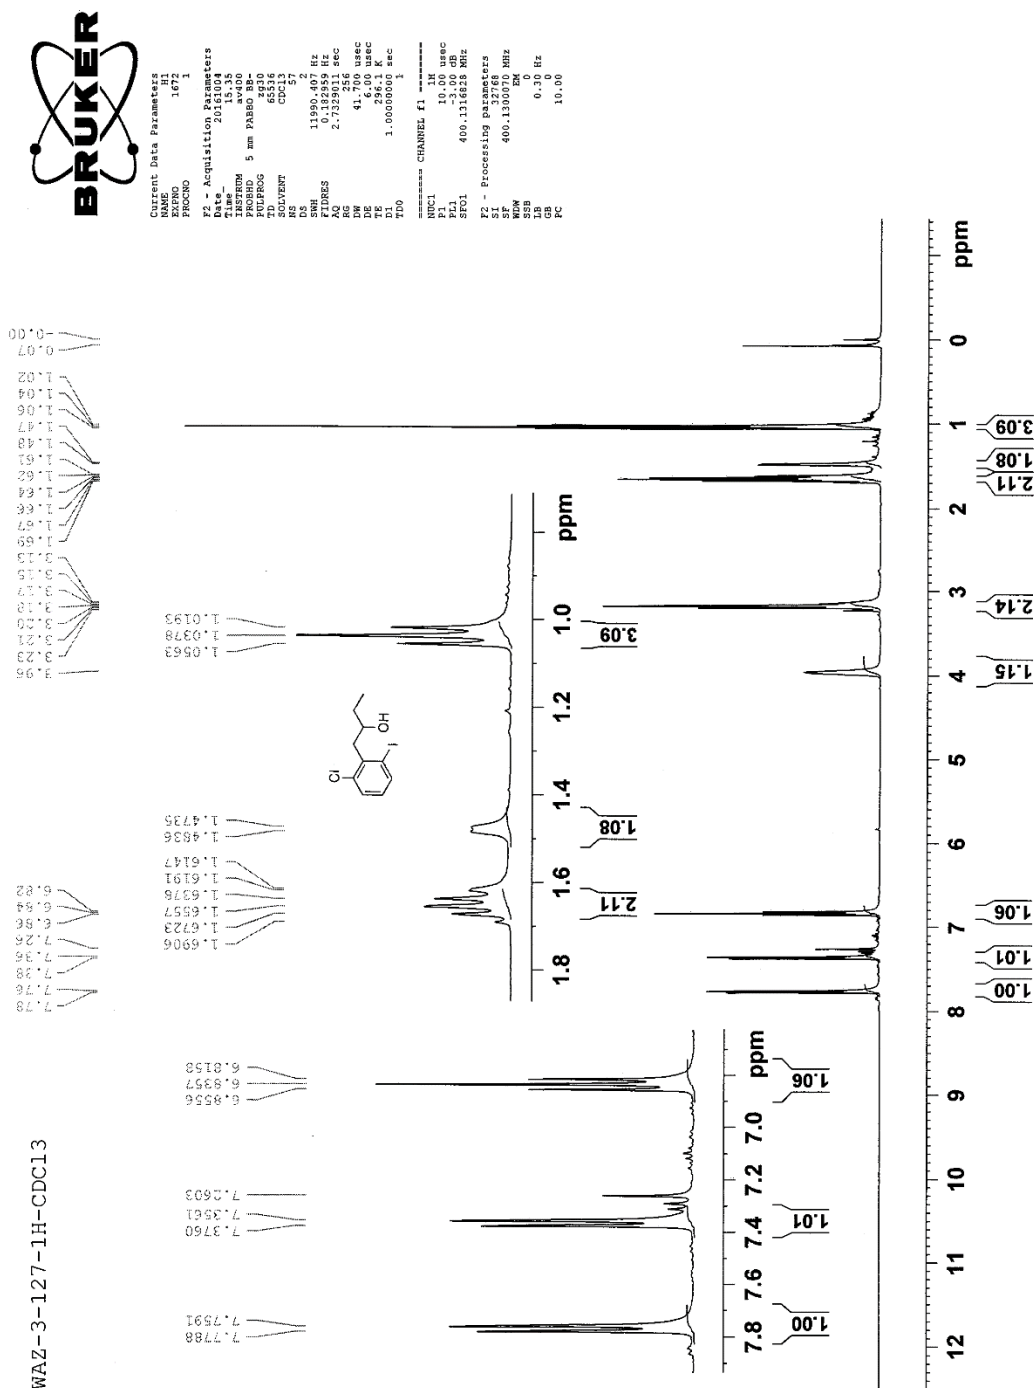

### 1.3.62 $^{13}\text{C}$ -NMR of 1-(2-chloro-6-iodophenyl)butan-2-ol (7ae) in $d\text{-CDCl}_3$ at 25 $^\circ\text{C}$ .

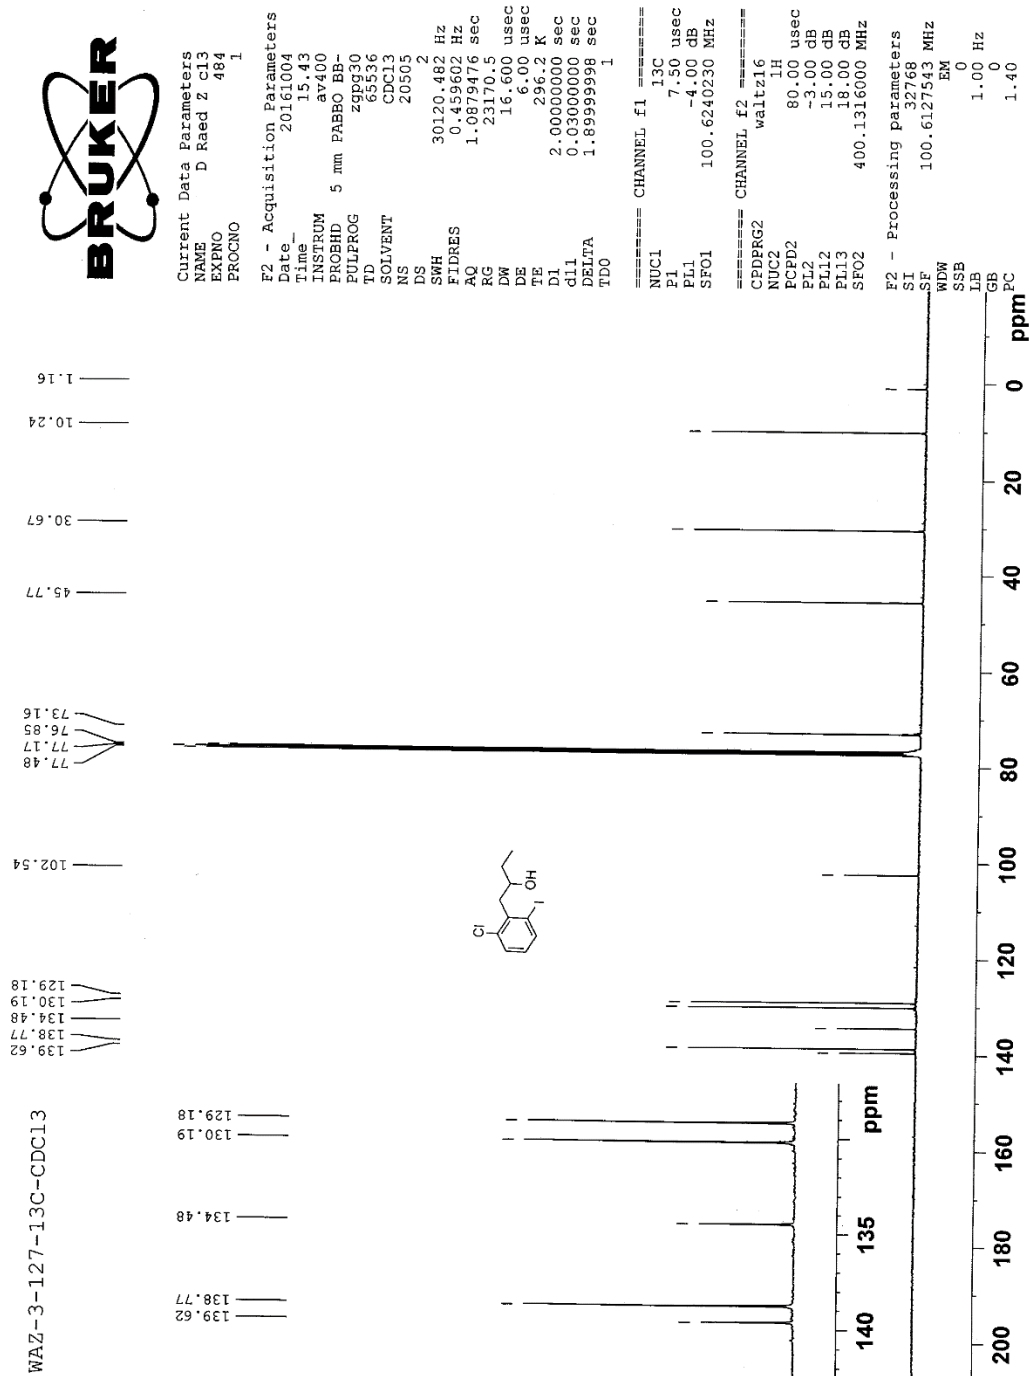

### 1.3.63 <sup>1</sup>H-NMR of 1-(2-bromo-6-iodophenyl)butan-2-ol (7af) in d-CDCl<sub>3</sub> at 25 °C.

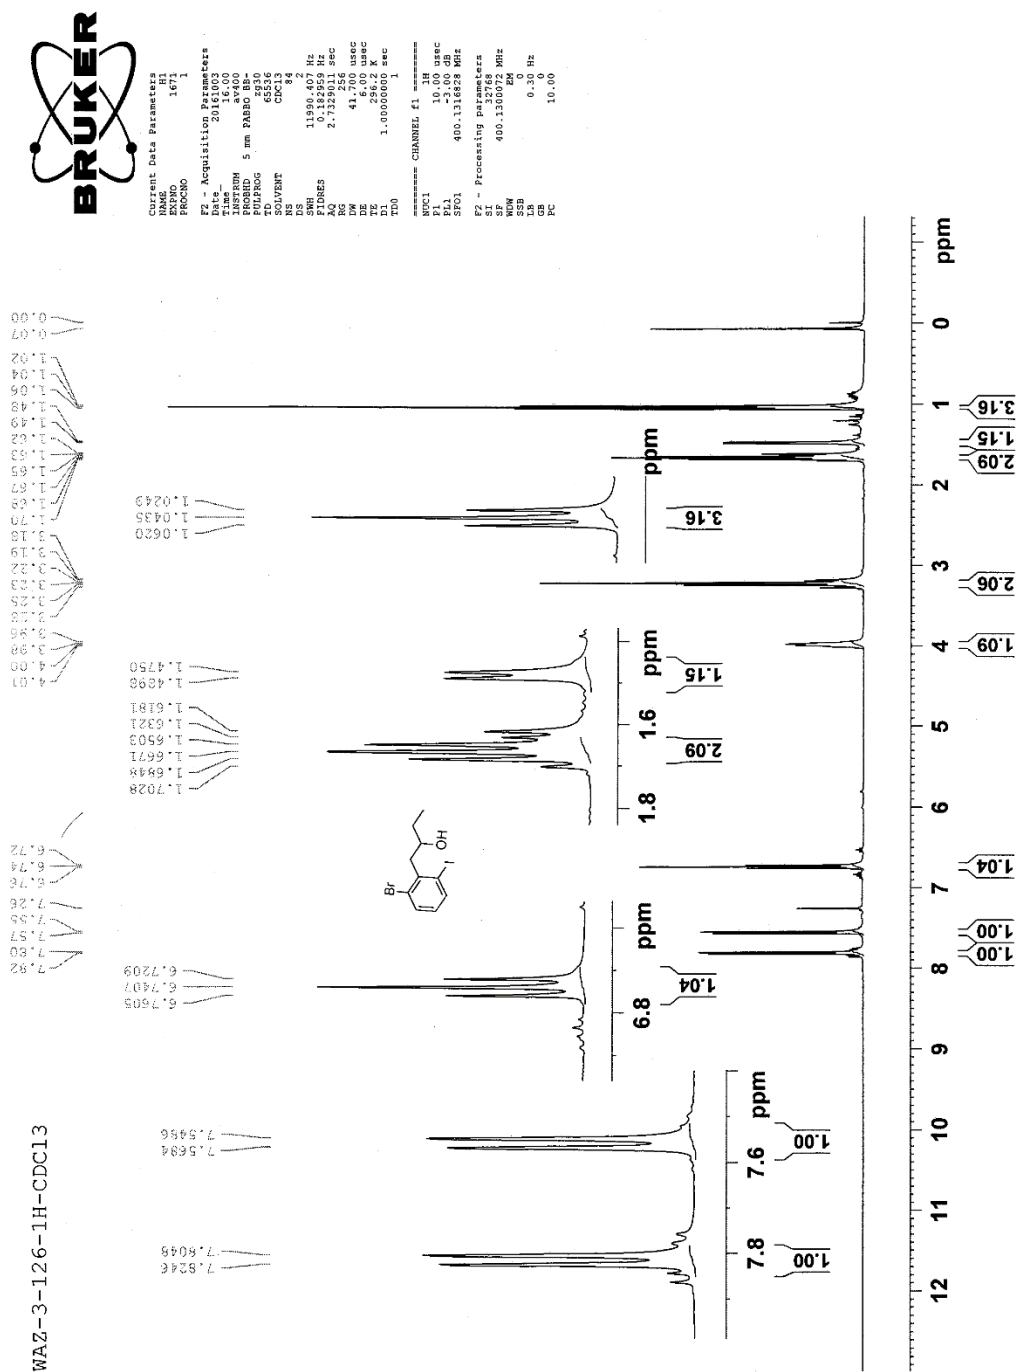



### 1.3.64 $^{13}\text{C}$ -NMR of 1-(2-bromo-6-iodophenyl)butan-2-ol (7af) in $d\text{-CDCl}_3$ at 25 $^\circ\text{C}$ .

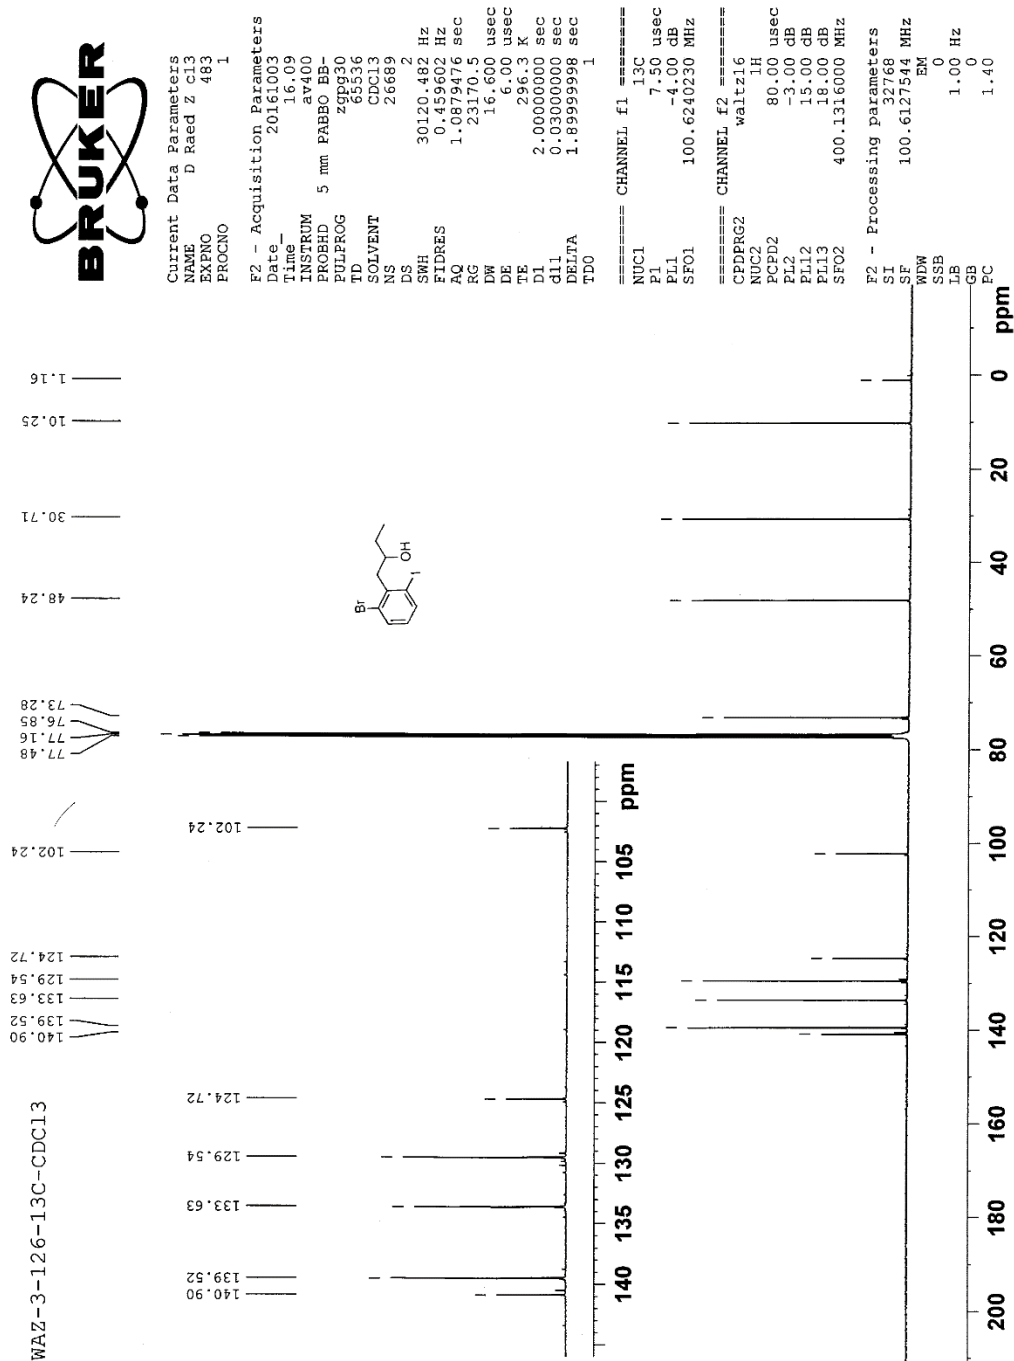

I.5.1 X-ray data of 1-(2,6-diiodo-4-methylphenyl)-3-methoxypropan-2-ol (**7g**)

## STRUCTURE REPORT

**XCL Code:** JUS1619

**Date:** 23 January 2017

**Compound:** 1-(2,6-Diiodo-4-methylphenyl)-3-methoxypropan-2-ol

**Formula:** C<sub>11</sub>H<sub>14</sub>I<sub>2</sub>O<sub>2</sub>

**Supervisor:** R. M. Al-Zoubi, Jordan University of Science and Technology

**Crystallographer:** R. McDonald

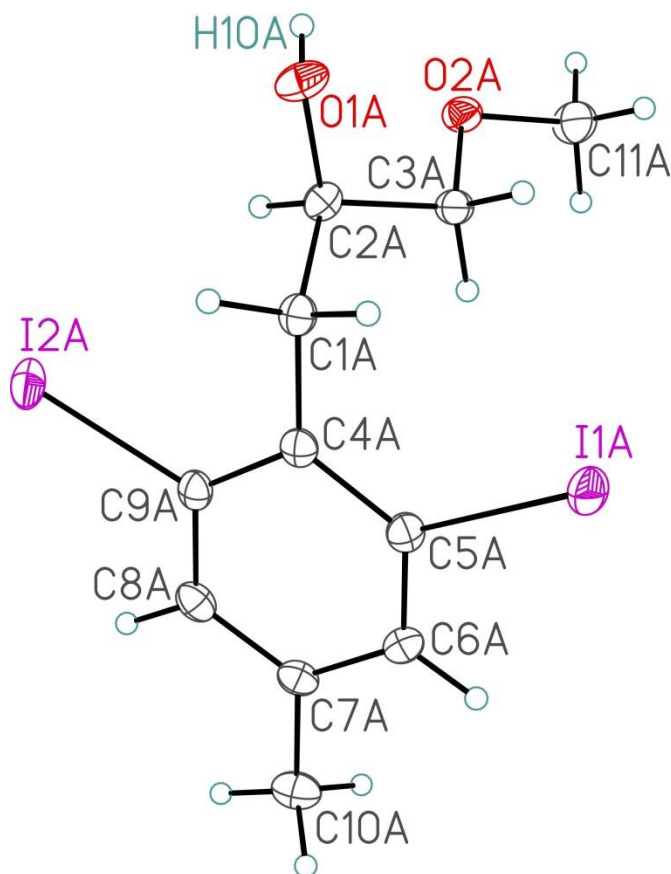

### Figure Legends

- Figure 1.** Perspective view of one of the four crystallographically-independent molecules of 1-(2,6-diiodo-4-methylphenyl)-3-methoxypropan-2-ol (molecule A) showing the atom labelling scheme. Non-hydrogen atoms are represented by Gaussian ellipsoids at the 30% probability level. Hydrogen atoms are shown with arbitrarily small thermal parameters.
- Figure 2.** Illustration of hydrogen-bonded interactions (dotted lines) between adjacent but crystallographically-independent molecules (molecules A and B) in the unit cell lattice. Note that the two molecules are not related by any crystallographic symmetry operations, and neither of these molecules in turn is related by symmetry to the independent molecules C and D (see Figure 3).
- Figure 3.** Illustration of hydrogen-bonded interactions (dotted lines) between adjacent but crystallographically-independent molecules (molecules C and D) in the unit cell lattice. Note that the two molecules are not related by any crystallographic symmetry operations, and neither of these molecules in turn is related by symmetry to the independent molecules A and B (see Figure 2).

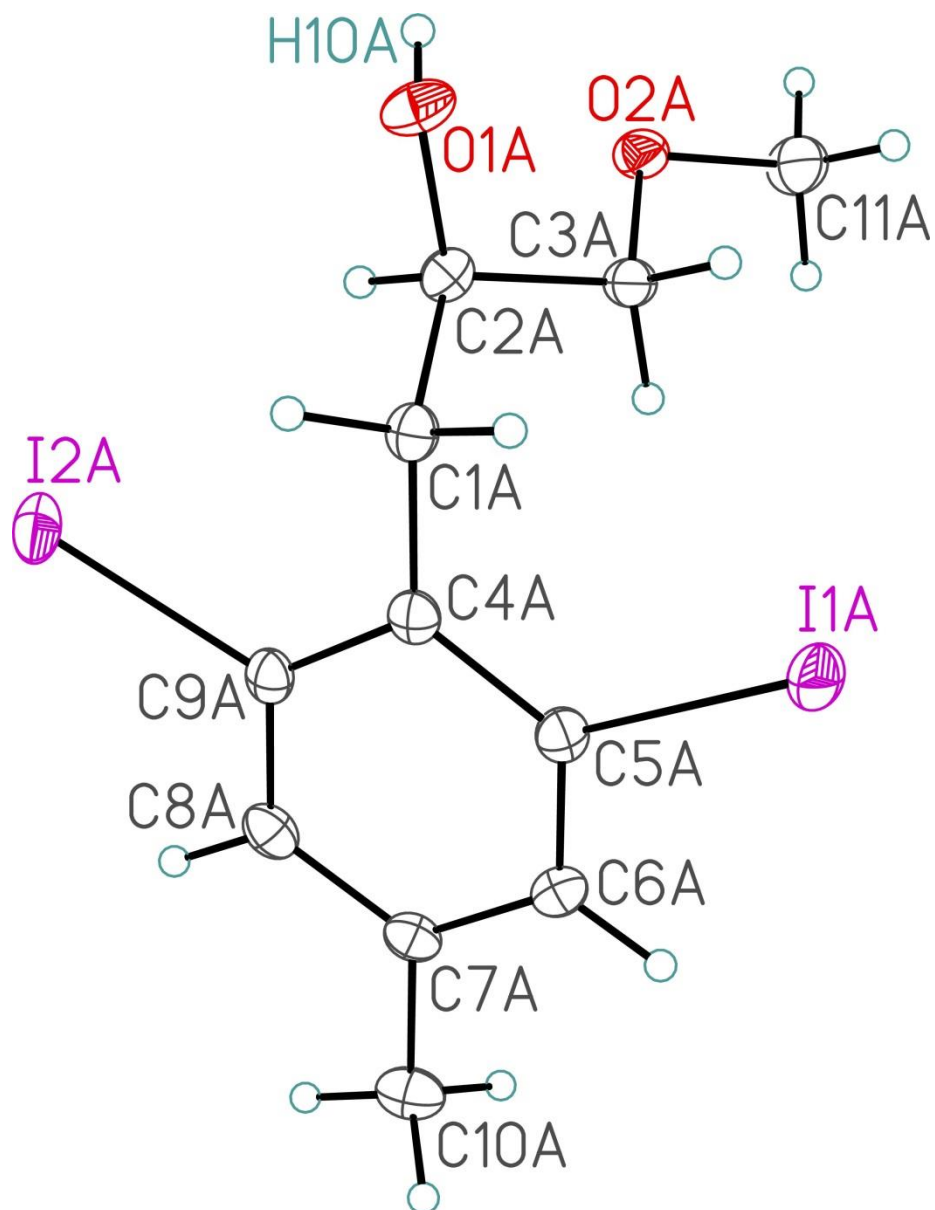

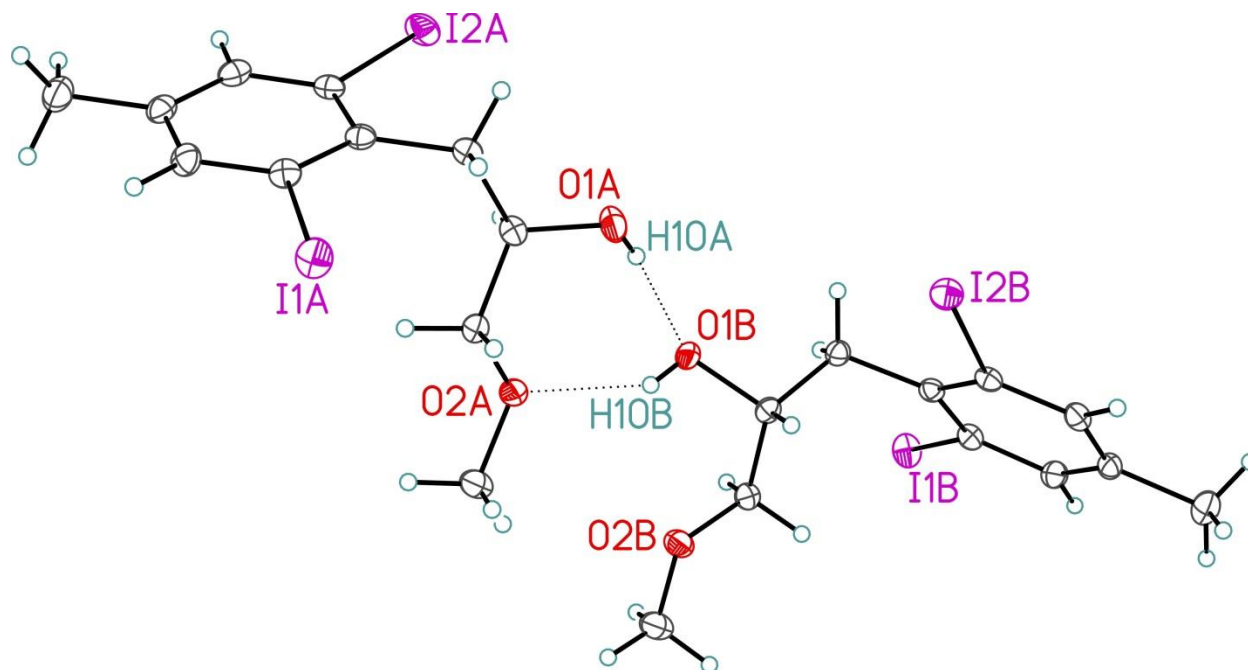

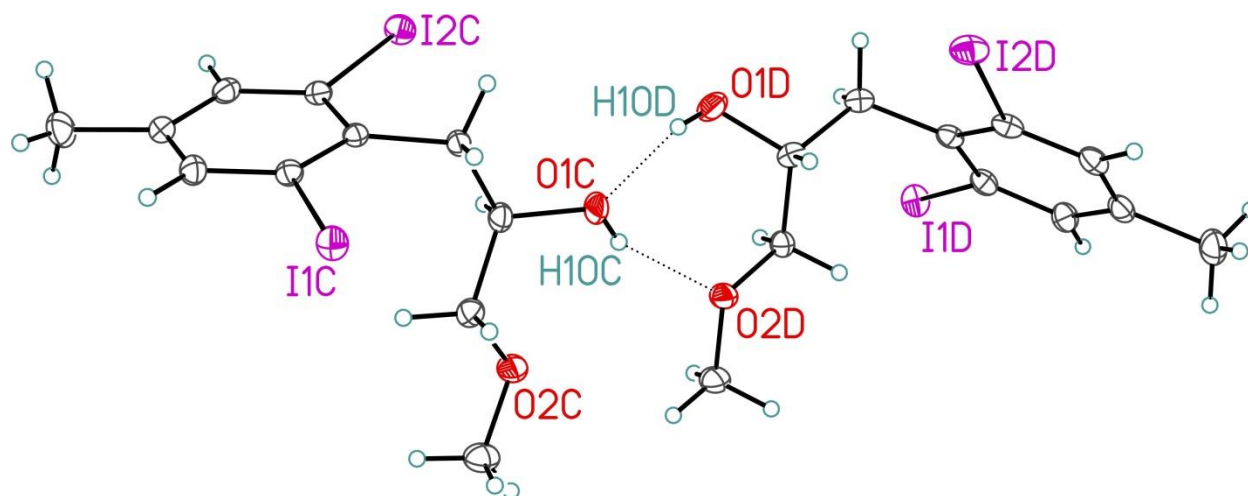

## List of Tables

- Table 1.** Crystallographic Experimental Details
- Table 2.** Atomic Coordinates and Equivalent Isotropic Displacement Parameters
- Table 3.** Selected Interatomic Distances
- Table 4.** Selected Interatomic Angles
- Table 5.** Hydrogen-Bonded Interactions
- Table 6.** Torsional Angles
- Table 7.** Anisotropic Displacement Parameters
- Table 8.** Derived Atomic Coordinates and Displacement Parameters for Hydrogen Atoms

**Table 1.** Crystallographic Experimental Details**A. Crystal Data**

|                                          |                                                               |
|------------------------------------------|---------------------------------------------------------------|
| formula                                  | C <sub>11</sub> H <sub>14</sub> I <sub>2</sub> O <sub>2</sub> |
| formula weight                           | 432.02                                                        |
| crystal dimensions (mm)                  | 0.32 × 0.21 × 0.11                                            |
| crystal system                           | monoclinic                                                    |
| space group                              | <i>P</i> 2 <sub>1</sub> / <i>c</i> (No. 14)                   |
| unit cell parameters <sup>a</sup>        |                                                               |
| <i>a</i> (Å)                             | 19.9273 (8)                                                   |
| <i>b</i> (Å)                             | 8.4314 (3)                                                    |
| <i>c</i> (Å)                             | 33.0097 (13)                                                  |
| β (deg)                                  | 107.2020 (5)                                                  |
| <i>V</i> (Å <sup>3</sup> )               | 5298.0 (4)                                                    |
| <i>Z</i>                                 | 16                                                            |
| ρ <sub>calcd</sub> (g cm <sup>-3</sup> ) | 2.167                                                         |
| μ (mm <sup>-1</sup> )                    | 4.729                                                         |

**B. Data Collection and Refinement Conditions**

|                                                                                                        |                                                                                        |
|--------------------------------------------------------------------------------------------------------|----------------------------------------------------------------------------------------|
| diffractometer                                                                                         | Bruker D8/APEX II CCD <sup>b</sup>                                                     |
| radiation (λ [Å])                                                                                      | graphite-monochromated Mo Kα (0.71073)                                                 |
| temperature (°C)                                                                                       | -100                                                                                   |
| scan type                                                                                              | ω scans (0.3°) (15 s exposures)                                                        |
| data collection 2θ limit (deg)                                                                         | 56.66                                                                                  |
| total data collected                                                                                   | 48427 (-26 ≤ <i>h</i> ≤ 26, -10 ≤ <i>k</i> ≤ 11, -43 ≤ <i>l</i> ≤ 44)                  |
| independent reflections                                                                                | 13041 ( <i>R</i> <sub>int</sub> = 0.0244)                                              |
| number of observed reflections ( <i>NO</i> )                                                           | 11132 [ <i>F</i> <sub>o</sub> <sup>2</sup> ≥ 2σ( <i>F</i> <sub>o</sub> <sup>2</sup> )] |
| structure solution method                                                                              | intrinsic phasing ( <i>SHELXT-2014</i> <sup>c</sup> )                                  |
| refinement method                                                                                      | full-matrix least-squares on <i>F</i> <sup>2</sup> ( <i>SHELXL-2014</i> <sup>d</sup> ) |
| absorption correction method                                                                           | Gaussian integration (face-indexed)                                                    |
| range of transmission factors                                                                          | 0.6964–0.3616                                                                          |
| data/restraints/parameters                                                                             | 13041 / 0 / 561                                                                        |
| goodness-of-fit ( <i>S</i> ) <sup>e</sup> [all data]                                                   | 1.045                                                                                  |
| final <i>R</i> indices <sup>f</sup>                                                                    |                                                                                        |
| <i>R</i> <sub>1</sub> [ <i>F</i> <sub>o</sub> <sup>2</sup> ≥ 2σ( <i>F</i> <sub>o</sub> <sup>2</sup> )] | 0.0246                                                                                 |
| <i>wR</i> <sub>2</sub> [all data]                                                                      | 0.0592                                                                                 |
| largest difference peak and hole                                                                       | 0.798 and -1.050 e Å <sup>-3</sup>                                                     |

<sup>a</sup>Obtained from least-squares refinement of 9803 reflections with 4.98° < 2θ < 53.70°.

<sup>b</sup>Programs for diffractometer operation, data collection, data reduction and absorption correction were those supplied by Bruker.

(continued)



**Table 1.** Crystallographic Experimental Details (continued)

<sup>c</sup>Sheldrick, G. M. *Acta Crystallogr.* **2015**, *A71*, 3–8.

<sup>d</sup>Sheldrick, G. M. *Acta Crystallogr.* **2015**, *C71*, 3–8.

<sup>e</sup> $S = [\sum w(F_o^2 - F_c^2)^2 / (n - p)]^{1/2}$  ( $n$  = number of data;  $p$  = number of parameters varied;  $w = [\sigma^2(F_o^2) + (0.0269P)^2 + 3.2851P]^{-1}$  where  $P = [\text{Max}(F_o^2, 0) + 2F_c^2]/3$ ).

<sup>f</sup> $R_1 = \sum ||F_o| - |F_c|| / \sum |F_o|$ ;  $wR_2 = [\sum w(F_o^2 - F_c^2)^2 / \sum w(F_o^4)]^{1/2}$ .

**Table 2.** Atomic Coordinates and Equivalent Isotropic Displacement Parameters*(a) Molecule A*

| Atom | <i>x</i>     | <i>y</i>    | <i>z</i>     | $U_{\text{eq}}, \text{\AA}^2$ |
|------|--------------|-------------|--------------|-------------------------------|
| I1A  | 0.13147(2)   | 0.31000(3)  | 0.00139(2)   | 0.03884(5)*                   |
| I2A  | 0.02734(2)   | -0.03393(3) | 0.13643(2)   | 0.03985(6)*                   |
| O1A  | 0.23704(11)  | 0.1923(3)   | 0.15605(7)   | 0.0363(5)*                    |
| O2A  | 0.18646(11)  | 0.5179(2)   | 0.14993(6)   | 0.0314(4)*                    |
| C1A  | 0.14615(14)  | 0.1240(3)   | 0.09479(8)   | 0.0271(6)*                    |
| C2A  | 0.16904(14)  | 0.2439(3)   | 0.13101(8)   | 0.0271(6)*                    |
| C3A  | 0.17104(14)  | 0.4105(3)   | 0.11491(8)   | 0.0272(6)*                    |
| C4A  | 0.07134(14)  | 0.1427(3)   | 0.06648(8)   | 0.0256(6)*                    |
| C5A  | 0.05390(15)  | 0.2173(3)   | 0.02672(8)   | 0.0273(6)*                    |
| C6A  | -0.01509(15) | 0.2354(4)   | 0.00138(9)   | 0.0313(6)*                    |
| C7A  | -0.07089(15) | 0.1786(3)   | 0.01469(9)   | 0.0293(6)*                    |
| C8A  | -0.05540(15) | 0.1019(3)   | 0.05326(9)   | 0.0307(6)*                    |
| C9A  | 0.01406(15)  | 0.0861(3)   | 0.07847(8)   | 0.0268(6)*                    |
| C10A | -0.14618(16) | 0.1969(4)   | -0.01230(10) | 0.0412(8)*                    |
| C11A | 0.18541(19)  | 0.6774(4)   | 0.13557(11)  | 0.0443(8)*                    |
| H10A | 0.2467(19)   | 0.242(4)    | 0.1767(11)   | 0.043(11)                     |

*(b) Molecule B*

| Atom | <i>x</i>    | <i>y</i>   | <i>z</i>    | $U_{\text{eq}}, \text{\AA}^2$ |
|------|-------------|------------|-------------|-------------------------------|
| I1B  | 0.38848(2)  | 0.54103(3) | 0.38479(2)  | 0.03626(5)*                   |
| I2B  | 0.47347(2)  | 0.17131(2) | 0.24723(2)  | 0.03291(5)*                   |
| O1B  | 0.27477(11) | 0.4060(3)  | 0.22605(6)  | 0.0296(4)*                    |
| O2B  | 0.30744(11) | 0.7255(2)  | 0.22782(6)  | 0.0333(5)*                    |
| C1B  | 0.36352(13) | 0.3521(3)  | 0.29051(8)  | 0.0250(5)*                    |
| C2B  | 0.34024(14) | 0.4657(3)  | 0.25272(8)  | 0.0241(5)*                    |
| C3B  | 0.33112(15) | 0.6343(3)  | 0.26571(8)  | 0.0274(6)*                    |
| C4B  | 0.43927(13) | 0.3740(3)  | 0.31607(8)  | 0.0233(5)*                    |
| C5B  | 0.46116(14) | 0.4548(3)  | 0.35473(8)  | 0.0246(5)*                    |
| C6B  | 0.53140(15) | 0.4811(3)  | 0.37680(8)  | 0.0283(6)*                    |
| C7B  | 0.58379(14) | 0.4225(3)  | 0.36121(8)  | 0.0259(6)*                    |
| C8B  | 0.56485(14) | 0.3370(3)  | 0.32360(8)  | 0.0265(6)*                    |
| C9B  | 0.49422(14) | 0.3140(3)  | 0.30203(8)  | 0.0230(5)*                    |
| C10B | 0.66084(15) | 0.4493(4)  | 0.38475(10) | 0.0378(7)*                    |
| C11B | 0.29863(18) | 0.8879(4)  | 0.23608(11) | 0.0406(7)*                    |
| H10B | 0.2605(19)  | 0.465(4)   | 0.2093(11)  | 0.045(11)                     |

**Table 2.** Atomic Coordinates and Displacement Parameters (continued)*(c) Molecule C*

| Atom | <i>x</i>     | <i>y</i>    | <i>z</i>    | $U_{eq}, \text{\AA}^2$ |
|------|--------------|-------------|-------------|------------------------|
| I1C  | 0.15514(2)   | 0.26110(2)  | 0.25370(2)  | 0.03148(5)*            |
| I2C  | 0.02430(2)   | -0.04087(2) | 0.38174(2)  | 0.03538(5)*            |
| O1C  | 0.23834(12)  | 0.1627(3)   | 0.40966(7)  | 0.0388(5)*             |
| O2C  | 0.19837(12)  | 0.4836(2)   | 0.40391(6)  | 0.0377(5)*             |
| C1C  | 0.15222(13)  | 0.0965(3)   | 0.34600(8)  | 0.0233(5)*             |
| C2C  | 0.17309(15)  | 0.2186(3)   | 0.38195(8)  | 0.0293(6)*             |
| C3C  | 0.18038(15)  | 0.3848(3)   | 0.36710(9)  | 0.0318(6)*             |
| C4C  | 0.08040(13)  | 0.1248(3)   | 0.31557(8)  | 0.0221(5)*             |
| C5C  | 0.06954(14)  | 0.1972(3)   | 0.27590(8)  | 0.0246(5)*             |
| C6C  | 0.00338(15)  | 0.2319(3)   | 0.24931(9)  | 0.0299(6)*             |
| C7C  | -0.05642(15) | 0.1966(3)   | 0.26112(9)  | 0.0302(6)*             |
| C8C  | -0.04773(14) | 0.1198(3)   | 0.29948(9)  | 0.0277(6)*             |
| C9C  | 0.01900(14)  | 0.0845(3)   | 0.32568(8)  | 0.0241(5)*             |
| C10C | -0.12837(16) | 0.2390(4)   | 0.23303(11) | 0.0455(8)*             |
| C11C | 0.19881(19)  | 0.6458(4)   | 0.39327(11) | 0.0429(8)*             |
| H10C | 0.253(2)     | 0.217(5)    | 0.4266(12)  | 0.057(13)              |

*(d) Molecule D*

| Atom | <i>x</i>    | <i>y</i>    | <i>z</i>    | $U_{eq}, \text{\AA}^2$ |
|------|-------------|-------------|-------------|------------------------|
| I1D  | 0.37374(2)  | 0.08056(3)  | 0.63409(2)  | 0.03588(5)*            |
| I2D  | 0.47517(2)  | -0.26087(2) | 0.49809(2)  | 0.03929(6)*            |
| O1D  | 0.26487(12) | -0.0389(3)  | 0.48073(8)  | 0.0405(5)*             |
| O2D  | 0.31751(11) | 0.2836(2)   | 0.48436(6)  | 0.0337(5)*             |
| C1D  | 0.35821(15) | -0.1071(3)  | 0.54122(9)  | 0.0290(6)*             |
| C2D  | 0.33379(15) | 0.0106(3)   | 0.50450(9)  | 0.0281(6)*             |
| C3D  | 0.33416(15) | 0.1796(3)   | 0.51993(8)  | 0.0283(6)*             |
| C4D  | 0.43310(14) | -0.0831(3)  | 0.56834(8)  | 0.0263(6)*             |
| C5D  | 0.45118(15) | -0.0057(3)  | 0.60763(9)  | 0.0282(6)*             |
| C6D  | 0.52017(16) | 0.0207(4)   | 0.63178(9)  | 0.0323(6)*             |
| C7D  | 0.57542(15) | -0.0320(3)  | 0.61752(9)  | 0.0318(6)*             |
| C8D  | 0.55980(15) | -0.1133(3)  | 0.57940(9)  | 0.0311(6)*             |
| C9D  | 0.49038(15) | -0.1366(3)  | 0.55545(9)  | 0.0289(6)*             |
| C10D | 0.65110(17) | -0.0056(4)  | 0.64304(10) | 0.0442(8)*             |
| C11D | 0.31891(19) | 0.4447(4)   | 0.49690(10) | 0.0445(8)*             |
| H10D | 0.254(2)    | 0.005(5)    | 0.4597(12)  | 0.056(13)              |

Anisotropically-refined atoms are marked with an asterisk (\*). The form of the anisotropic displacement parameter is:  $\exp[-2\pi^2(h^2a^{*2}U_{11} + k^2b^{*2}U_{22} + l^2c^{*2}U_{33} + 2klb^{*c^{*}}U_{23} + 2hla^{*c^{*}}U_{13} + 2hka^{*b^{*}}U_{12})]$ .

**Table 3.** Selected Interatomic Distances (Å)*(a) Molecule A*

| Atom1 | Atom2 | Distance | Atom1 | Atom2 | Distance |
|-------|-------|----------|-------|-------|----------|
| I1A   | C5A   | 2.113(3) | C4A   | C5A   | 1.403(4) |
| I2A   | C9A   | 2.111(3) | C4A   | C9A   | 1.398(4) |
| O1A   | C2A   | 1.430(3) | C5A   | C6A   | 1.390(4) |
| O2A   | C3A   | 1.428(3) | C6A   | C7A   | 1.396(4) |
| O2A   | C11A  | 1.424(4) | C7A   | C8A   | 1.379(4) |
| C1A   | C2A   | 1.529(4) | C7A   | C10A  | 1.509(4) |
| C1A   | C4A   | 1.515(4) | C8A   | C9A   | 1.395(4) |
| C2A   | C3A   | 1.507(4) |       |       |          |

*(b) Molecule B*

| Atom1 | Atom2 | Distance | Atom1 | Atom2 | Distance |
|-------|-------|----------|-------|-------|----------|
| I1B   | C5B   | 2.112(3) | C4B   | C5B   | 1.397(4) |
| I2B   | C9B   | 2.109(3) | C4B   | C9B   | 1.404(3) |
| O1B   | C2B   | 1.432(3) | C5B   | C6B   | 1.391(4) |
| O2B   | C3B   | 1.425(3) | C6B   | C7B   | 1.385(4) |
| O2B   | C11B  | 1.417(4) | C7B   | C8B   | 1.388(4) |
| C1B   | C2B   | 1.532(4) | C7B   | C10B  | 1.519(4) |
| C1B   | C4B   | 1.507(4) | C8B   | C9B   | 1.390(4) |
| C2B   | C3B   | 1.511(4) |       |       |          |

*(c) Molecule C*

| Atom1 | Atom2 | Distance | Atom1 | Atom2 | Distance |
|-------|-------|----------|-------|-------|----------|
| I1C   | C5C   | 2.116(3) | C4C   | C5C   | 1.402(3) |
| I2C   | C9C   | 2.107(3) | C4C   | C9C   | 1.402(3) |
| O1C   | C2C   | 1.430(3) | C5C   | C6C   | 1.382(4) |
| O2C   | C3C   | 1.429(3) | C6C   | C7C   | 1.391(4) |
| O2C   | C11C  | 1.413(4) | C7C   | C8C   | 1.387(4) |
| C1C   | C2C   | 1.533(4) | C7C   | C10C  | 1.502(4) |
| C1C   | C4C   | 1.505(3) | C8C   | C9C   | 1.387(4) |
| C2C   | C3C   | 1.505(4) |       |       |          |

*(d) Molecule D*

| Atom1 | Atom2 | Distance | Atom1 | Atom2 | Distance |
|-------|-------|----------|-------|-------|----------|
| I1D   | C5D   | 2.114(3) | C4D   | C5D   | 1.401(4) |
| I2D   | C9D   | 2.106(3) | C4D   | C9D   | 1.405(4) |
| O1D   | C2D   | 1.428(4) | C5D   | C6D   | 1.388(4) |
| O2D   | C3D   | 1.424(3) | C6D   | C7D   | 1.392(4) |
| O2D   | C11D  | 1.418(4) | C7D   | C8D   | 1.385(4) |
| C1D   | C2D   | 1.531(4) | C7D   | C10D  | 1.511(4) |
| C1D   | C4D   | 1.510(4) | C8D   | C9D   | 1.389(4) |
| C2D   | C3D   | 1.513(4) |       |       |          |

**Table 4.** Selected Interatomic Angles (deg)*(a) Molecule A*

| Atom1 | Atom2 | Atom3 | Angle    | Atom1 | Atom2 | Atom3 | Angle    |
|-------|-------|-------|----------|-------|-------|-------|----------|
| C3A   | O2A   | C11A  | 110.5(2) | I1A   | C5A   | C6A   | 115.5(2) |
| C2A   | C1A   | C4A   | 115.2(2) | C4A   | C5A   | C6A   | 122.6(3) |
| O1A   | C2A   | C1A   | 105.3(2) | C5A   | C6A   | C7A   | 120.7(3) |
| O1A   | C2A   | C3A   | 111.6(2) | C6A   | C7A   | C8A   | 118.0(3) |
| C1A   | C2A   | C3A   | 112.0(2) | C6A   | C7A   | C10A  | 121.6(3) |
| O2A   | C3A   | C2A   | 109.1(2) | C8A   | C7A   | C10A  | 120.3(3) |
| C1A   | C4A   | C5A   | 123.3(2) | C7A   | C8A   | C9A   | 120.5(3) |
| C1A   | C4A   | C9A   | 121.8(2) | I2A   | C9A   | C4A   | 121.7(2) |
| C5A   | C4A   | C9A   | 114.9(2) | I2A   | C9A   | C8A   | 115.0(2) |
| I1A   | C5A   | C4A   | 121.9(2) | C4A   | C9A   | C8A   | 123.2(3) |

*(b) Molecule B*

| Atom1 | Atom2 | Atom3 | Angle      | Atom1 | Atom2 | Atom3 | Angle      |
|-------|-------|-------|------------|-------|-------|-------|------------|
| C3B   | O2B   | C11B  | 112.4(2)   | I1B   | C5B   | C6B   | 114.98(19) |
| C2B   | C1B   | C4B   | 113.0(2)   | C4B   | C5B   | C6B   | 123.4(2)   |
| O1B   | C2B   | C1B   | 106.4(2)   | C5B   | C6B   | C7B   | 120.0(3)   |
| O1B   | C2B   | C3B   | 109.9(2)   | C6B   | C7B   | C8B   | 118.8(2)   |
| C1B   | C2B   | C3B   | 112.9(2)   | C6B   | C7B   | C10B  | 121.1(3)   |
| O2B   | C3B   | C2B   | 107.2(2)   | C8B   | C7B   | C10B  | 120.1(2)   |
| C1B   | C4B   | C5B   | 124.2(2)   | C7B   | C8B   | C9B   | 119.8(2)   |
| C1B   | C4B   | C9B   | 121.4(2)   | I2B   | C9B   | C4B   | 120.98(19) |
| C5B   | C4B   | C9B   | 114.4(2)   | I2B   | C9B   | C8B   | 115.52(19) |
| I1B   | C5B   | C4B   | 121.63(19) | C4B   | C9B   | C8B   | 123.4(2)   |

*(c) Molecule C*

| Atom1 | Atom2 | Atom3 | Angle      | Atom1 | Atom2 | Atom3 | Angle      |
|-------|-------|-------|------------|-------|-------|-------|------------|
| C3C   | O2C   | C11C  | 111.8(2)   | I1C   | C5C   | C6C   | 116.2(2)   |
| C2C   | C1C   | C4C   | 113.4(2)   | C4C   | C5C   | C6C   | 122.7(2)   |
| O1C   | C2C   | C1C   | 105.1(2)   | C5C   | C6C   | C7C   | 120.8(3)   |
| O1C   | C2C   | C3C   | 111.0(2)   | C6C   | C7C   | C8C   | 118.0(3)   |
| C1C   | C2C   | C3C   | 113.8(2)   | C6C   | C7C   | C10C  | 121.1(3)   |
| O2C   | C3C   | C2C   | 106.9(2)   | C8C   | C7C   | C10C  | 120.9(3)   |
| C1C   | C4C   | C5C   | 123.1(2)   | C7C   | C8C   | C9C   | 120.5(3)   |
| C1C   | C4C   | C9C   | 121.8(2)   | I2C   | C9C   | C4C   | 120.68(19) |
| C5C   | C4C   | C9C   | 115.0(2)   | I2C   | C9C   | C8C   | 116.41(19) |
| I1C   | C5C   | C4C   | 121.11(19) | C4C   | C9C   | C8C   | 122.9(2)   |

**Table 4.** Selected Interatomic Angles (continued)*(d) Molecule D*

| Atom1 | Atom2 | Atom3 | Angle    | Atom1 | Atom2 | Atom3 | Angle    |
|-------|-------|-------|----------|-------|-------|-------|----------|
| C3D   | O2D   | C11D  | 111.7(2) | I1D   | C5D   | C6D   | 115.3(2) |
| C2D   | C1D   | C4D   | 114.2(2) | C4D   | C5D   | C6D   | 123.1(3) |
| O1D   | C2D   | C1D   | 105.9(2) | C5D   | C6D   | C7D   | 120.2(3) |
| O1D   | C2D   | C3D   | 111.6(2) | C6D   | C7D   | C8D   | 118.5(3) |
| C1D   | C2D   | C3D   | 112.0(2) | C6D   | C7D   | C10D  | 121.6(3) |
| O2D   | C3D   | C2D   | 109.0(2) | C8D   | C7D   | C10D  | 119.9(3) |
| C1D   | C4D   | C5D   | 123.4(2) | C7D   | C8D   | C9D   | 120.4(3) |
| C1D   | C4D   | C9D   | 121.8(3) | I2D   | C9D   | C4D   | 121.2(2) |
| C5D   | C4D   | C9D   | 114.9(3) | I2D   | C9D   | C8D   | 115.9(2) |
| I1D   | C5D   | C4D   | 121.6(2) | C4D   | C9D   | C8D   | 122.9(3) |

**Table 5.** Hydrogen-Bonded Interactions

| D–H···A        | D–H<br>(Å) | H···A<br>(Å) | D···A<br>(Å) | ∠D–H···A<br>(deg) |
|----------------|------------|--------------|--------------|-------------------|
| O1A–H1OA···O1B | 0.78(3)    | 2.08(4)      | 2.850(3)     | 171(4)            |
| O1B–H1OB···O2A | 0.74(4)    | 2.12(4)      | 2.772(3)     | 147(4)            |
| O1C–H1OC···O2D | 0.71(4)    | 2.04(4)      | 2.703(3)     | 155(4)            |
| O1D–H1OD···O1C | 0.76(4)    | 2.07(4)      | 2.818(3)     | 168(4)            |

**Table 6.** Torsional Angles (deg)*(a) Molecule A*

| Atom1 | Atom2 | Atom3 | Atom4 | Angle       | Atom1 | Atom2 | Atom3 | Atom4 | Angle      |
|-------|-------|-------|-------|-------------|-------|-------|-------|-------|------------|
| C11A  | O2A   | C3A   | C2A   | -177.2(2)   | C1A   | C4A   | C9A   | C8A   | 179.7(3)   |
| C4A   | C1A   | C2A   | O1A   | 173.2(2)    | C5A   | C4A   | C9A   | I2A   | 178.92(19) |
| C4A   | C1A   | C2A   | C3A   | -65.4(3)    | C5A   | C4A   | C9A   | C8A   | -0.1(4)    |
| C2A   | C1A   | C4A   | C5A   | 100.3(3)    | I1A   | C5A   | C6A   | C7A   | 179.9(2)   |
| C2A   | C1A   | C4A   | C9A   | -79.5(3)    | C4A   | C5A   | C6A   | C7A   | -0.2(4)    |
| O1A   | C2A   | C3A   | O2A   | -67.5(3)    | C5A   | C6A   | C7A   | C8A   | -1.1(4)    |
| C1A   | C2A   | C3A   | O2A   | 174.8(2)    | C5A   | C6A   | C7A   | C10A  | -180.0(3)  |
| C1A   | C4A   | C5A   | I1A   | 0.9(4)      | C6A   | C7A   | C8A   | C9A   | 1.7(4)     |
| C1A   | C4A   | C5A   | C6A   | -179.1(3)   | C10A  | C7A   | C8A   | C9A   | -179.4(3)  |
| C9A   | C4A   | C5A   | I1A   | -179.25(19) | C7A   | C8A   | C9A   | I2A   | 179.8(2)   |
| C9A   | C4A   | C5A   | C6A   | 0.8(4)      | C7A   | C8A   | C9A   | C4A   | -1.1(4)    |
| C1A   | C4A   | C9A   | I2A   | -1.2(4)     |       |       |       |       |            |

*(b) Molecule B*

| Atom1 | Atom2 | Atom3 | Atom4 | Angle       | Atom1 | Atom2 | Atom3 | Atom4 | Angle      |
|-------|-------|-------|-------|-------------|-------|-------|-------|-------|------------|
| C11B  | O2B   | C3B   | C2B   | -178.5(2)   | C1B   | C4B   | C9B   | C8B   | 177.2(2)   |
| C4B   | C1B   | C2B   | O1B   | 165.9(2)    | C5B   | C4B   | C9B   | I2B   | 174.68(18) |
| C4B   | C1B   | C2B   | C3B   | -73.4(3)    | C5B   | C4B   | C9B   | C8B   | -2.3(4)    |
| C2B   | C1B   | C4B   | C5B   | 101.9(3)    | I1B   | C5B   | C6B   | C7B   | 176.6(2)   |
| C2B   | C1B   | C4B   | C9B   | -77.6(3)    | C4B   | C5B   | C6B   | C7B   | -1.8(4)    |
| O1B   | C2B   | C3B   | O2B   | -59.5(3)    | C5B   | C6B   | C7B   | C8B   | -0.3(4)    |
| C1B   | C2B   | C3B   | O2B   | -178.2(2)   | C5B   | C6B   | C7B   | C10B  | -179.8(3)  |
| C1B   | C4B   | C5B   | I1B   | 5.2(4)      | C6B   | C7B   | C8B   | C9B   | 1.0(4)     |
| C1B   | C4B   | C5B   | C6B   | -176.5(3)   | C10B  | C7B   | C8B   | C9B   | -179.5(3)  |
| C9B   | C4B   | C5B   | I1B   | -175.32(18) | C7B   | C8B   | C9B   | I2B   | -176.8(2)  |
| C9B   | C4B   | C5B   | C6B   | 3.0(4)      | C7B   | C8B   | C9B   | C4B   | 0.4(4)     |
| C1B   | C4B   | C9B   | I2B   | -5.8(3)     |       |       |       |       |            |

*(c) Molecule C*

| Atom1 | Atom2 | Atom3 | Atom4 | Angle     | Atom1 | Atom2 | Atom3 | Atom4 | Angle       |
|-------|-------|-------|-------|-----------|-------|-------|-------|-------|-------------|
| C11C  | O2C   | C3C   | C2C   | -173.3(2) | C9C   | C4C   | C5C   | I1C   | -178.12(18) |
| C4C   | C1C   | C2C   | O1C   | 173.8(2)  | C9C   | C4C   | C5C   | C6C   | 2.3(4)      |
| C4C   | C1C   | C2C   | C3C   | -64.6(3)  | C1C   | C4C   | C9C   | I2C   | -6.6(3)     |
| C2C   | C1C   | C4C   | C5C   | 100.9(3)  | C1C   | C4C   | C9C   | C8C   | 175.2(2)    |
| C2C   | C1C   | C4C   | C9C   | -77.0(3)  | C5C   | C4C   | C9C   | I2C   | 175.30(18)  |
| O1C   | C2C   | C3C   | O2C   | -62.9(3)  | C5C   | C4C   | C9C   | C8C   | -2.9(4)     |
| C1C   | C2C   | C3C   | O2C   | 178.8(2)  | I1C   | C5C   | C6C   | C7C   | -179.2(2)   |
| C1C   | C4C   | C5C   | I1C   | 3.8(4)    | C4C   | C5C   | C6C   | C7C   | 0.4(4)      |
| C1C   | C4C   | C5C   | C6C   | -175.8(3) | C5C   | C6C   | C7C   | C8C   | -2.7(4)     |



**Table 6.** Torsional Angles (continued)

| Atom1                 | Atom2 | Atom3 | Atom4 | Angle       | Atom1 | Atom2 | Atom3 | Atom4 | Angle      |
|-----------------------|-------|-------|-------|-------------|-------|-------|-------|-------|------------|
| C5C                   | C6C   | C7C   | C10C  | 177.9(3)    | C7C   | C8C   | C9C   | I2C   | -177.5(2)  |
| C6C                   | C7C   | C8C   | C9C   | 2.1(4)      | C7C   | C8C   | C9C   | C4C   | 0.7(4)     |
| C10C                  | C7C   | C8C   | C9C   | -178.4(3)   |       |       |       |       |            |
| <i>(d) Molecule D</i> |       |       |       |             |       |       |       |       |            |
| Atom1                 | Atom2 | Atom3 | Atom4 | Angle       | Atom1 | Atom2 | Atom3 | Atom4 | Angle      |
| C11D                  | O2D   | C3D   | C2D   | -178.4(2)   | C1D   | C4D   | C9D   | C8D   | 178.7(3)   |
| C4D                   | C1D   | C2D   | O1D   | 175.2(2)    | C5D   | C4D   | C9D   | I2D   | 178.53(19) |
| C4D                   | C1D   | C2D   | C3D   | -62.9(3)    | C5D   | C4D   | C9D   | C8D   | -0.8(4)    |
| C2D                   | C1D   | C4D   | C5D   | 100.6(3)    | I1D   | C5D   | C6D   | C7D   | 179.6(2)   |
| C2D                   | C1D   | C4D   | C9D   | -78.8(3)    | C4D   | C5D   | C6D   | C7D   | -0.7(4)    |
| O1D                   | C2D   | C3D   | O2D   | -66.9(3)    | C5D   | C6D   | C7D   | C8D   | -1.2(4)    |
| C1D                   | C2D   | C3D   | O2D   | 174.5(2)    | C5D   | C6D   | C7D   | C10D  | -179.9(3)  |
| C1D                   | C4D   | C5D   | I1D   | 1.9(4)      | C6D   | C7D   | C8D   | C9D   | 2.1(4)     |
| C1D                   | C4D   | C5D   | C6D   | -177.8(3)   | C10D  | C7D   | C8D   | C9D   | -179.3(3)  |
| C9D                   | C4D   | C5D   | I1D   | -178.67(19) | C7D   | C8D   | C9D   | I2D   | 179.6(2)   |
| C9D                   | C4D   | C5D   | C6D   | 1.6(4)      | C7D   | C8D   | C9D   | C4D   | -1.1(4)    |
| C1D                   | C4D   | C9D   | I2D   | -2.0(4)     |       |       |       |       |            |

**Table 7.** Anisotropic Displacement Parameters ( $U_{ij}$ , Å<sup>2</sup>)

| Atom | $U_{11}$    | $U_{22}$    | $U_{33}$    | $U_{23}$    | $U_{13}$    | $U_{12}$    |
|------|-------------|-------------|-------------|-------------|-------------|-------------|
| I1A  | 0.03830(11) | 0.05088(13) | 0.03132(10) | 0.00538(9)  | 0.01641(9)  | -0.00416(9) |
| I2A  | 0.04497(12) | 0.03570(11) | 0.04251(12) | 0.01357(9)  | 0.01855(10) | -0.00039(9) |
| O1A  | 0.0365(12)  | 0.0379(13)  | 0.0287(11)  | -0.0012(10) | 0.0009(9)   | 0.0134(10)  |
| O2A  | 0.0355(11)  | 0.0247(10)  | 0.0289(10)  | -0.0013(8)  | 0.0017(9)   | -0.0009(9)  |
| C1A  | 0.0301(14)  | 0.0235(14)  | 0.0290(14)  | 0.0007(11)  | 0.0107(12)  | 0.0020(11)  |
| C2A  | 0.0285(14)  | 0.0281(15)  | 0.0250(13)  | 0.0016(11)  | 0.0084(11)  | 0.0039(11)  |
| C3A  | 0.0256(13)  | 0.0281(15)  | 0.0260(13)  | -0.0007(11) | 0.0049(11)  | -0.0006(11) |
| C4A  | 0.0309(14)  | 0.0209(13)  | 0.0261(13)  | -0.0042(10) | 0.0103(11)  | -0.0004(11) |
| C5A  | 0.0318(15)  | 0.0274(14)  | 0.0255(13)  | -0.0035(11) | 0.0127(12)  | -0.0013(12) |
| C6A  | 0.0344(16)  | 0.0355(17)  | 0.0228(13)  | -0.0014(12) | 0.0066(12)  | -0.0022(13) |
| C7A  | 0.0290(14)  | 0.0276(15)  | 0.0304(14)  | -0.0074(12) | 0.0073(12)  | -0.0025(12) |
| C8A  | 0.0308(15)  | 0.0268(15)  | 0.0365(15)  | -0.0081(12) | 0.0133(12)  | -0.0043(12) |
| C9A  | 0.0344(15)  | 0.0198(13)  | 0.0281(13)  | -0.0017(11) | 0.0119(12)  | -0.0011(11) |
| C10A | 0.0315(16)  | 0.0444(19)  | 0.0421(18)  | -0.0074(15) | 0.0023(14)  | -0.0001(14) |
| C11A | 0.054(2)    | 0.0265(16)  | 0.0436(18)  | 0.0044(14)  | 0.0007(16)  | -0.0013(15) |
| I1B  | 0.03690(11) | 0.04505(12) | 0.02971(10) | -0.00424(8) | 0.01430(8)  | 0.00938(9)  |
| I2B  | 0.03692(11) | 0.03092(10) | 0.03188(10) | -0.00898(8) | 0.01169(8)  | 0.00246(8)  |
| O1B  | 0.0276(10)  | 0.0300(11)  | 0.0254(10)  | 0.0027(9)   | -0.0011(8)  | -0.0049(9)  |
| O2B  | 0.0423(12)  | 0.0255(11)  | 0.0283(10)  | 0.0017(8)   | 0.0046(9)   | 0.0011(9)   |
| C1B  | 0.0222(13)  | 0.0253(14)  | 0.0278(13)  | -0.0008(11) | 0.0077(11)  | -0.0006(11) |
| C2B  | 0.0237(13)  | 0.0266(14)  | 0.0218(12)  | -0.0018(10) | 0.0063(10)  | -0.0027(11) |
| C3B  | 0.0278(14)  | 0.0272(14)  | 0.0256(13)  | 0.0018(11)  | 0.0055(11)  | 0.0002(11)  |
| C4B  | 0.0252(13)  | 0.0210(13)  | 0.0248(13)  | 0.0036(10)  | 0.0091(11)  | -0.0004(10) |
| C5B  | 0.0279(14)  | 0.0243(14)  | 0.0231(13)  | 0.0006(10)  | 0.0101(11)  | 0.0035(11)  |
| C6B  | 0.0311(15)  | 0.0291(15)  | 0.0226(13)  | -0.0006(11) | 0.0045(11)  | -0.0012(12) |
| C7B  | 0.0235(13)  | 0.0265(14)  | 0.0262(13)  | 0.0055(11)  | 0.0051(11)  | 0.0000(11)  |
| C8B  | 0.0263(13)  | 0.0264(14)  | 0.0285(13)  | 0.0056(11)  | 0.0108(11)  | 0.0043(11)  |
| C9B  | 0.0298(14)  | 0.0195(13)  | 0.0206(12)  | 0.0013(10)  | 0.0091(11)  | 0.0020(10)  |
| C10B | 0.0300(15)  | 0.0461(19)  | 0.0345(16)  | 0.0001(14)  | 0.0055(13)  | -0.0033(14) |
| C11B | 0.0484(19)  | 0.0272(16)  | 0.0450(18)  | 0.0042(14)  | 0.0117(15)  | 0.0001(14)  |
| I1C  | 0.03049(10) | 0.03862(11) | 0.02809(9)  | 0.00459(8)  | 0.01289(8)  | -0.00062(8) |
| I2C  | 0.03839(11) | 0.03674(11) | 0.03336(10) | 0.00887(8)  | 0.01422(8)  | -0.00466(8) |
| O1C  | 0.0394(13)  | 0.0350(13)  | 0.0290(11)  | -0.0045(10) | -0.0098(10) | 0.0048(10)  |
| O2C  | 0.0459(13)  | 0.0266(11)  | 0.0351(11)  | -0.0064(9)  | 0.0032(10)  | 0.0011(9)   |
| C1C  | 0.0234(13)  | 0.0231(13)  | 0.0222(12)  | 0.0002(10)  | 0.0048(10)  | 0.0021(10)  |
| C2C  | 0.0281(14)  | 0.0317(15)  | 0.0239(13)  | -0.0003(11) | 0.0013(11)  | 0.0022(12)  |
| C3C  | 0.0304(15)  | 0.0304(16)  | 0.0319(15)  | -0.0035(12) | 0.0052(12)  | -0.0001(12) |
| C4C  | 0.0243(13)  | 0.0194(13)  | 0.0222(12)  | -0.0019(10) | 0.0061(10)  | -0.0002(10) |
| C5C  | 0.0258(13)  | 0.0244(14)  | 0.0242(13)  | -0.0008(10) | 0.0083(11)  | -0.0018(11) |
| C6C  | 0.0294(14)  | 0.0320(15)  | 0.0260(13)  | 0.0027(12)  | 0.0045(11)  | -0.0011(12) |

**Table 7.** Anisotropic Displacement Parameters (continued)

| Atom | $U_{11}$    | $U_{22}$    | $U_{33}$    | $U_{23}$    | $U_{13}$    | $U_{12}$    |
|------|-------------|-------------|-------------|-------------|-------------|-------------|
| C7C  | 0.0281(14)  | 0.0252(14)  | 0.0327(15)  | 0.0000(12)  | 0.0018(12)  | -0.0015(11) |
| C8C  | 0.0235(13)  | 0.0258(14)  | 0.0338(14)  | -0.0046(12) | 0.0087(11)  | -0.0028(11) |
| C9C  | 0.0290(14)  | 0.0220(13)  | 0.0221(12)  | -0.0011(10) | 0.0088(11)  | -0.0033(11) |
| C10C | 0.0275(16)  | 0.046(2)    | 0.058(2)    | 0.0139(17)  | 0.0040(15)  | 0.0059(14)  |
| C11C | 0.047(2)    | 0.0302(17)  | 0.053(2)    | -0.0051(15) | 0.0178(16)  | -0.0002(14) |
| I1D  | 0.03691(11) | 0.04433(12) | 0.03025(10) | -0.00184(8) | 0.01585(8)  | 0.00659(9)  |
| I2D  | 0.04881(13) | 0.03061(11) | 0.04615(12) | -0.01048(9) | 0.02594(10) | -0.00152(9) |
| O1D  | 0.0395(13)  | 0.0405(14)  | 0.0343(12)  | -0.0008(11) | -0.0002(10) | -0.0153(10) |
| O2D  | 0.0414(12)  | 0.0254(11)  | 0.0283(10)  | 0.0008(8)   | 0.0008(9)   | -0.0026(9)  |
| C1D  | 0.0332(15)  | 0.0241(14)  | 0.0317(14)  | -0.0018(11) | 0.0127(12)  | -0.0042(12) |
| C2D  | 0.0307(15)  | 0.0277(14)  | 0.0266(13)  | -0.0020(11) | 0.0096(12)  | -0.0059(12) |
| C3D  | 0.0295(14)  | 0.0279(15)  | 0.0245(13)  | 0.0017(11)  | 0.0036(11)  | 0.0007(12)  |
| C4D  | 0.0310(14)  | 0.0208(13)  | 0.0294(14)  | 0.0048(11)  | 0.0125(12)  | 0.0008(11)  |
| C5D  | 0.0336(15)  | 0.0261(14)  | 0.0280(14)  | 0.0041(11)  | 0.0138(12)  | 0.0052(12)  |
| C6D  | 0.0342(16)  | 0.0351(16)  | 0.0269(14)  | 0.0046(12)  | 0.0080(12)  | 0.0041(13)  |
| C7D  | 0.0325(15)  | 0.0272(15)  | 0.0358(15)  | 0.0095(12)  | 0.0102(13)  | 0.0059(12)  |
| C8D  | 0.0333(15)  | 0.0266(15)  | 0.0387(16)  | 0.0068(12)  | 0.0186(13)  | 0.0074(12)  |
| C9D  | 0.0394(16)  | 0.0201(13)  | 0.0326(14)  | 0.0027(11)  | 0.0189(13)  | 0.0015(12)  |
| C10D | 0.0358(17)  | 0.052(2)    | 0.0403(18)  | 0.0110(16)  | 0.0042(14)  | 0.0048(15)  |
| C11D | 0.056(2)    | 0.0272(17)  | 0.0384(17)  | -0.0022(13) | -0.0046(15) | -0.0052(15) |

The form of the anisotropic displacement parameter is:

$$\exp[-2\pi^2(h^2a^2U_{11} + k^2b^2U_{22} + l^2c^2U_{33} + 2klb^*c^*U_{23} + 2hla^*c^*U_{13} + 2hka^*b^*U_{12})]$$

**Table 8.** Derived Atomic Coordinates and Displacement Parameters for Hydrogen Atoms

| Atom | <i>x</i> | <i>y</i> | <i>z</i> | $U_{eq}, \text{\AA}^2$ |
|------|----------|----------|----------|------------------------|
| H1A  | 0.1782   | 0.1329   | 0.0770   | 0.033                  |
| H1B  | 0.1516   | 0.0159   | 0.1071   | 0.033                  |
| H2A  | 0.1358   | 0.2394   | 0.1485   | 0.032                  |
| H3A  | 0.2075   | 0.4189   | 0.1001   | 0.033                  |
| H3B  | 0.1251   | 0.4376   | 0.0945   | 0.033                  |
| H6A  | -0.0243  | 0.2870   | -0.0253  | 0.038                  |
| H8A  | -0.0923  | 0.0595   | 0.0627   | 0.037                  |
| H10A | -0.1775  | 0.1524   | 0.0027   | 0.049                  |
| H10B | -0.1531  | 0.1405   | -0.0392  | 0.049                  |
| H10C | -0.1568  | 0.3096   | -0.0180  | 0.049                  |
| H11A | 0.1961   | 0.7494   | 0.1600   | 0.053                  |
| H11B | 0.2207   | 0.6905   | 0.1205   | 0.053                  |
| H11C | 0.1388   | 0.7021   | 0.1164   | 0.053                  |
| H1C  | 0.3334   | 0.3689   | 0.3092   | 0.030                  |
| H1D  | 0.3566   | 0.2416   | 0.2800   | 0.030                  |
| H2B  | 0.3757   | 0.4638   | 0.2367   | 0.029                  |
| H3C  | 0.2962   | 0.6384   | 0.2817   | 0.033                  |
| H3D  | 0.3763   | 0.6764   | 0.2840   | 0.033                  |
| H6B  | 0.5434   | 0.5394   | 0.4026   | 0.034                  |
| H8B  | 0.6000   | 0.2943   | 0.3126   | 0.032                  |
| H10D | 0.6657   | 0.5450   | 0.4022   | 0.045                  |
| H10E | 0.6873   | 0.4623   | 0.3643   | 0.045                  |
| H10F | 0.6791   | 0.3577   | 0.4030   | 0.045                  |
| H11D | 0.2823   | 0.9458   | 0.2092   | 0.049                  |
| H11E | 0.2638   | 0.8983   | 0.2516   | 0.049                  |
| H11F | 0.3436   | 0.9321   | 0.2532   | 0.049                  |
| H1E  | 0.1873   | 0.0989   | 0.3301   | 0.028                  |
| H1F  | 0.1534   | -0.0106  | 0.3585   | 0.028                  |
| H2C  | 0.1371   | 0.2182   | 0.3976   | 0.035                  |
| H3E  | 0.2176   | 0.3892   | 0.3528   | 0.038                  |
| H3F  | 0.1356   | 0.4204   | 0.3468   | 0.038                  |
| H6C  | -0.0013  | 0.2804   | 0.2226   | 0.036                  |
| H8C  | -0.0878  | 0.0911   | 0.3079   | 0.033                  |
| H10G | -0.1605  | 0.1502   | 0.2321   | 0.055                  |
| H10H | -0.1261  | 0.2615   | 0.2043   | 0.055                  |
| H10I | -0.1455  | 0.3331   | 0.2444   | 0.055                  |
| H11G | 0.2113   | 0.7097   | 0.4192   | 0.052                  |
| H11H | 0.2333   | 0.6635   | 0.3779   | 0.052                  |
| H11I | 0.1521   | 0.6767   | 0.3753   | 0.052                  |
| H1G  | 0.3268   | -0.0981  | 0.5594   | 0.035                  |

**Table 8.** Derived Parameters for Hydrogen Atoms (continued)

| Atom | <i>x</i> | <i>y</i> | <i>z</i> | $U_{\text{eq}}, \text{\AA}^2$ |
|------|----------|----------|----------|-------------------------------|
| H1H  | 0.3534   | -0.2160  | 0.5295   | 0.035                         |
| H2D  | 0.3656   | 0.0026   | 0.4861   | 0.034                         |
| H3G  | 0.2992   | 0.1917   | 0.5357   | 0.034                         |
| H3H  | 0.3811   | 0.2061   | 0.5393   | 0.034                         |
| H6D  | 0.5297   | 0.0749   | 0.6581   | 0.039                         |
| H8D  | 0.5967   | -0.1533  | 0.5696   | 0.037                         |
| H10J | 0.6814   | -0.0204  | 0.6247   | 0.053                         |
| H10K | 0.6642   | -0.0818  | 0.6665   | 0.053                         |
| H10L | 0.6567   | 0.1025   | 0.6544   | 0.053                         |
| H11J | 0.3072   | 0.5127   | 0.4717   | 0.053                         |
| H11K | 0.2845   | 0.4614   | 0.5124   | 0.053                         |
| H11L | 0.3660   | 0.4714   | 0.5152   | 0.053                         |

I.5.2 X-ray data of 1-(2,6-diiodo-4-methylphenyl)-3-(2-methoxyphenoxy)propan-2-ol (**7k**)

## STRUCTURE REPORT

**XCL Code:** JUS1617

**Date:** 23 January 2017

**Compound:** 1-(2,6-Diiodo-4-methylphenyl)-3-(2-methoxyphenoxy)propan-2-ol

**Formula:** C<sub>17</sub>H<sub>18</sub>I<sub>2</sub>O<sub>3</sub>

**Supervisor:** R. M. Al-Zoubi, Jordan University of Science and Technology

**Crystallographer:** R. McDonald

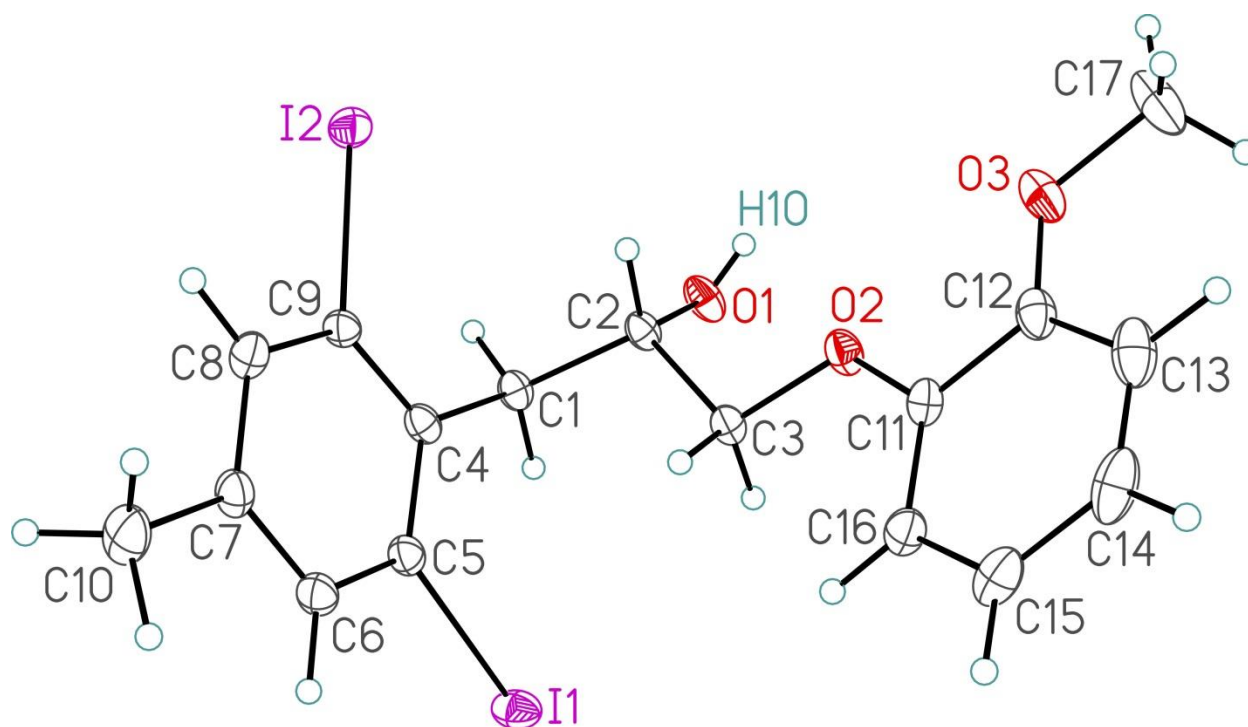

### Figure Legends

- Figure 1.** Perspective view of the 1-(2,6-diiodo-4-methylphenyl)-3-(2-methoxyphenoxy)propan-2-ol molecule showing the atom labelling scheme. Non-hydrogen atoms are represented by Gaussian ellipsoids at the 30% probability level. Hydrogen atoms are shown with arbitrarily small thermal parameters.
- Figure 2.** Illustration of hydrogen-bonded contacts (dotted lines) between adjacent molecules in the crystal lattice. Primed atoms are related to unprimed ones via the crystallographic rotational-translational symmetry operation  $(x, 1/2-y, 1/2+z)$ . Double-primed atoms are related to unprimed ones via the crystallographic rotational-translational symmetry operation  $(x, 1/2-y, -1/2+z)$ . The chain propagates in a direction parallel to the crystal unit cell's *c* axis.

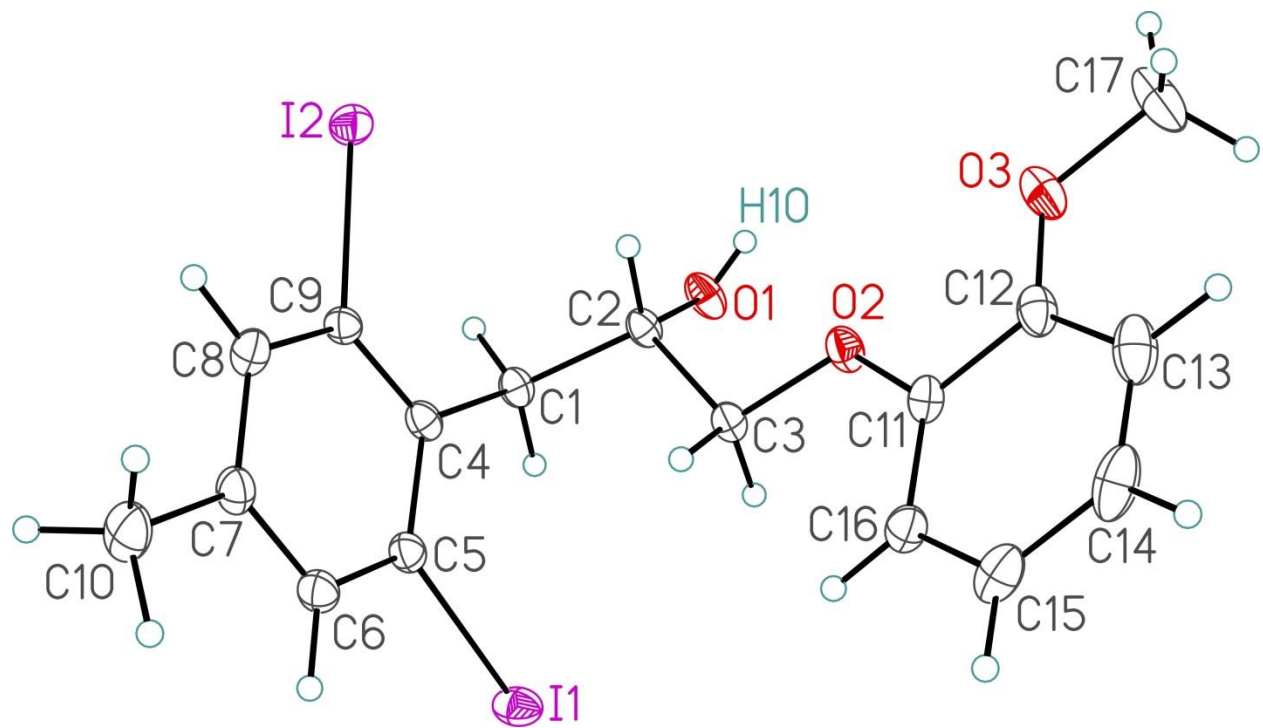



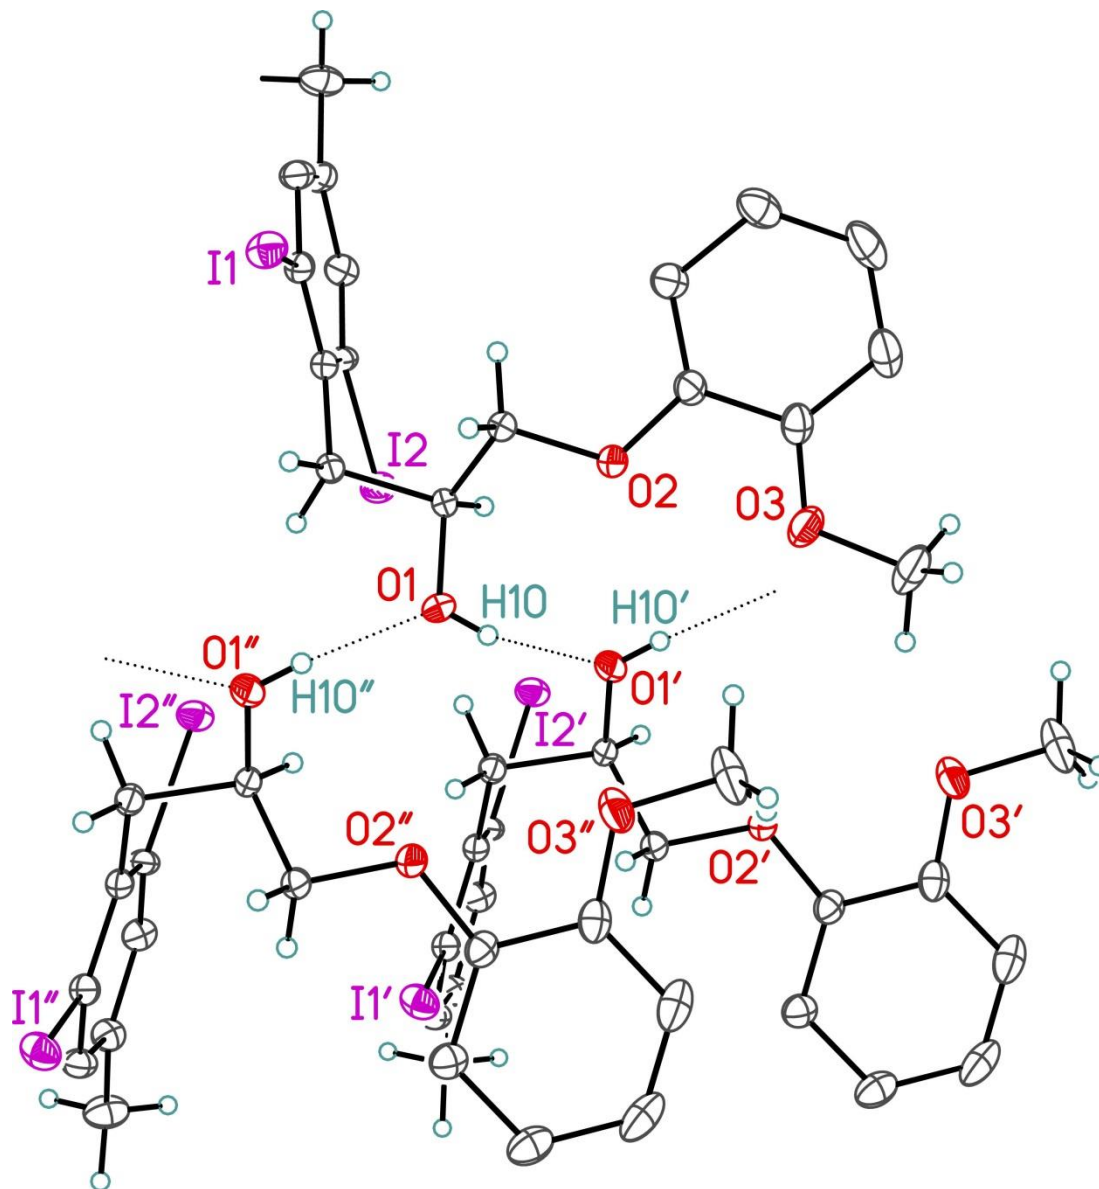

## List of Tables

- Table 1.** Crystallographic Experimental Details
- Table 2.** Atomic Coordinates and Equivalent Isotropic Displacement Parameters
- Table 3.** Selected Interatomic Distances
- Table 4.** Selected Interatomic Angles
- Table 5.** Hydrogen-Bonded Interactions
- Table 6.** Torsional Angles
- Table 7.** Anisotropic Displacement Parameters
- Table 8.** Derived Atomic Coordinates and Displacement Parameters for Hydrogen Atoms

**Table 1.** Crystallographic Experimental Details**A. Crystal Data**

|                                          |                                                               |
|------------------------------------------|---------------------------------------------------------------|
| formula                                  | C <sub>17</sub> H <sub>18</sub> I <sub>2</sub> O <sub>3</sub> |
| formula weight                           | 524.11                                                        |
| crystal dimensions (mm)                  | 0.31 × 0.10 × 0.04                                            |
| crystal system                           | monoclinic                                                    |
| space group                              | <i>P</i> 2 <sub>1</sub> / <i>c</i> (No. 14)                   |
| unit cell parameters <sup>a</sup>        |                                                               |
| <i>a</i> (Å)                             | 10.6792 (4)                                                   |
| <i>b</i> (Å)                             | 29.0562 (9)                                                   |
| <i>c</i> (Å)                             | 5.62368 (19)                                                  |
| β (deg)                                  | 92.355 (2)                                                    |
| <i>V</i> (Å <sup>3</sup> )               | 1743.54 (10)                                                  |
| <i>Z</i>                                 | 4                                                             |
| ρ <sub>calcd</sub> (g cm <sup>-3</sup> ) | 1.997                                                         |
| μ (mm <sup>-1</sup> )                    | 28.41                                                         |

**B. Data Collection and Refinement Conditions**

|                                                                                                        |                                                                                        |
|--------------------------------------------------------------------------------------------------------|----------------------------------------------------------------------------------------|
| diffractometer                                                                                         | Bruker D8/APEX II CCD <sup>b</sup>                                                     |
| radiation (λ [Å])                                                                                      | Cu Kα (1.54178) (microfocus source)                                                    |
| temperature (°C)                                                                                       | -100                                                                                   |
| scan type                                                                                              | ω and φ scans (1.0°) (5 s exposures)                                                   |
| data collection 2θ limit (deg)                                                                         | 148.18                                                                                 |
| total data collected                                                                                   | 11975 (-13 ≤ <i>h</i> ≤ 12, -36 ≤ <i>k</i> ≤ 36, -6 ≤ <i>l</i> ≤ 6)                    |
| independent reflections                                                                                | 3517 ( <i>R</i> <sub>int</sub> = 0.0502)                                               |
| number of observed reflections ( <i>NO</i> )                                                           | 3075 [ <i>F</i> <sub>o</sub> <sup>2</sup> ≥ 2σ( <i>F</i> <sub>o</sub> <sup>2</sup> )]  |
| structure solution method                                                                              | intrinsic phasing ( <i>SHELXT-2014</i> <sup>c</sup> )                                  |
| refinement method                                                                                      | full-matrix least-squares on <i>F</i> <sup>2</sup> ( <i>SHELXL-2014</i> <sup>d</sup> ) |
| absorption correction method                                                                           | Gaussian integration (face-indexed)                                                    |
| range of transmission factors                                                                          | 1.0000–0.4831                                                                          |
| data/restraints/parameters                                                                             | 3517 / 0 / 204                                                                         |
| goodness-of-fit ( <i>S</i> ) <sup>e</sup> [all data]                                                   | 1.023                                                                                  |
| final <i>R</i> indices <sup>f</sup>                                                                    |                                                                                        |
| <i>R</i> <sub>1</sub> [ <i>F</i> <sub>o</sub> <sup>2</sup> ≥ 2σ( <i>F</i> <sub>o</sub> <sup>2</sup> )] | 0.0310                                                                                 |
| <i>wR</i> <sub>2</sub> [all data]                                                                      | 0.0834                                                                                 |
| largest difference peak and hole                                                                       | 1.066 and -1.399 e Å <sup>-3</sup>                                                     |

<sup>a</sup>Obtained from least-squares refinement of 9976 reflections with 6.08° < 2θ < 148.00°.

<sup>b</sup>Programs for diffractometer operation, data collection, data reduction and absorption correction were those supplied by Bruker.

(continued)

**Table 1.** Crystallographic Experimental Details (continued)

<sup>c</sup>Sheldrick, G. M. *Acta Crystallogr.* **2015**, *A71*, 3–8.

<sup>d</sup>Sheldrick, G. M. *Acta Crystallogr.* **2015**, *C71*, 3–8.

<sup>e</sup> $S = [\sum w(F_o^2 - F_c^2)^2 / (n - p)]^{1/2}$  ( $n$  = number of data;  $p$  = number of parameters varied;  $w = [\sigma^2(F_o^2) + (0.0501P)^2]^{-1}$  where  $P = [\text{Max}(F_o^2, 0) + 2F_c^2]/3$ ).

<sup>f</sup> $R_1 = \sum ||F_o| - |F_c|| / \sum |F_o|$ ;  $wR_2 = [\sum w(F_o^2 - F_c^2)^2 / \sum w(F_o^4)]^{1/2}$ .

**Table 2.** Atomic Coordinates and Equivalent Isotropic Displacement Parameters

| Atom | <i>x</i>    | <i>y</i>    | <i>z</i>    | <i>U</i> <sub>eq</sub> , Å <sup>2</sup> |
|------|-------------|-------------|-------------|-----------------------------------------|
| I1   | 0.13498(3)  | 0.08465(2)  | -0.52957(5) | 0.03591(10)*                            |
| I2   | -0.16250(2) | 0.19914(2)  | 0.17704(5)  | 0.03350(9)*                             |
| O1   | 0.2094(3)   | 0.23473(10) | -0.1249(6)  | 0.0352(7)*                              |
| O2   | 0.3423(3)   | 0.16776(10) | 0.1542(5)   | 0.0314(6)*                              |
| O3   | 0.4729(3)   | 0.19215(12) | 0.5218(6)   | 0.0426(8)*                              |
| C1   | 0.0513(4)   | 0.18029(13) | -0.2347(7)  | 0.0256(7)*                              |
| C2   | 0.1567(4)   | 0.19207(13) | -0.0512(7)  | 0.0248(7)*                              |
| C3   | 0.2574(4)   | 0.15537(13) | -0.0384(7)  | 0.0252(7)*                              |
| C4   | -0.0224(4)  | 0.13768(13) | -0.1705(7)  | 0.0253(7)*                              |
| C5   | -0.0023(4)  | 0.09441(14) | -0.2745(7)  | 0.0273(8)*                              |
| C6   | -0.0661(4)  | 0.05514(14) | -0.2126(8)  | 0.0309(8)*                              |
| C7   | -0.1554(4)  | 0.05655(15) | -0.0388(8)  | 0.0305(8)*                              |
| C8   | -0.1801(4)  | 0.09896(15) | 0.0646(8)   | 0.0305(8)*                              |
| C9   | -0.1152(4)  | 0.13797(12) | -0.0039(7)  | 0.0253(7)*                              |
| C10  | -0.2220(4)  | 0.01336(16) | 0.0364(10)  | 0.0431(11)*                             |
| C11  | 0.4170(4)   | 0.13413(14) | 0.2523(8)   | 0.0287(8)*                              |
| C12  | 0.4873(4)   | 0.14749(16) | 0.4560(8)   | 0.0330(9)*                              |
| C13  | 0.5633(4)   | 0.1153(2)   | 0.5766(9)   | 0.0446(12)*                             |
| C14  | 0.5672(5)   | 0.0705(2)   | 0.4951(11)  | 0.0507(14)*                             |
| C15  | 0.4989(4)   | 0.05721(17) | 0.2931(10)  | 0.0412(11)*                             |
| C16  | 0.4242(4)   | 0.08934(15) | 0.1669(8)   | 0.0321(9)*                              |
| C17  | 0.5473(6)   | 0.2087(2)   | 0.7215(9)   | 0.0554(15)*                             |
| H10  | 0.233(5)    | 0.2464(19)  | -0.017(10)  | 0.031(14)                               |

Anisotropically-refined atoms are marked with an asterisk (\*). The form of the anisotropic displacement parameter is:  $\exp[-2\pi^2(h^2a^*U_{11} + k^2b^*U_{22} + l^2c^*U_{33} + 2klb^*c^*U_{23} + 2hla^*c^*U_{13} + 2hka^*b^*U_{12})]$ .

**Table 3.** Selected Interatomic Distances (Å)

| Atom1 | Atom2 | Distance | Atom1 | Atom2 | Distance |
|-------|-------|----------|-------|-------|----------|
| I1    | C5    | 2.112(4) | C5    | C6    | 1.381(6) |
| I2    | C9    | 2.119(4) | C6    | C7    | 1.394(6) |
| O1    | C2    | 1.430(5) | C7    | C8    | 1.392(6) |
| O2    | C3    | 1.429(4) | C7    | C10   | 1.511(6) |
| O2    | C11   | 1.364(5) | C8    | C9    | 1.391(5) |
| O3    | C12   | 1.360(6) | C11   | C12   | 1.398(6) |
| O3    | C17   | 1.432(6) | C11   | C16   | 1.391(6) |
| C1    | C2    | 1.534(5) | C12   | C13   | 1.395(6) |
| C1    | C4    | 1.519(5) | C13   | C14   | 1.382(8) |
| C2    | C3    | 1.515(5) | C14   | C15   | 1.380(8) |
| C4    | C5    | 1.407(5) | C15   | C16   | 1.402(6) |
| C4    | C9    | 1.391(6) |       |       |          |

**Table 4.** Selected Interatomic Angles (deg)

| Atom1 | Atom2 | Atom3 | Angle    | Atom1 | Atom2 | Atom3 | Angle    |
|-------|-------|-------|----------|-------|-------|-------|----------|
| C3    | O2    | C11   | 117.9(3) | C8    | C7    | C10   | 121.3(4) |
| C12   | O3    | C17   | 117.9(4) | C7    | C8    | C9    | 120.0(4) |
| C2    | C1    | C4    | 113.3(3) | I2    | C9    | C4    | 121.3(3) |
| O1    | C2    | C1    | 106.6(3) | I2    | C9    | C8    | 114.8(3) |
| O1    | C2    | C3    | 109.7(3) | C4    | C9    | C8    | 123.9(4) |
| C1    | C2    | C3    | 112.0(3) | O2    | C11   | C12   | 114.7(4) |
| O2    | C3    | C2    | 106.6(3) | O2    | C11   | C16   | 124.8(4) |
| C1    | C4    | C5    | 122.7(4) | C12   | C11   | C16   | 120.5(4) |
| C1    | C4    | C9    | 123.1(3) | O3    | C12   | C11   | 115.2(4) |
| C5    | C4    | C9    | 114.2(4) | O3    | C12   | C13   | 125.2(4) |
| I1    | C5    | C4    | 121.6(3) | C11   | C12   | C13   | 119.6(5) |
| I1    | C5    | C6    | 115.1(3) | C12   | C13   | C14   | 119.7(5) |
| C4    | C5    | C6    | 123.3(4) | C13   | C14   | C15   | 121.0(5) |
| C5    | C6    | C7    | 120.7(4) | C14   | C15   | C16   | 120.1(5) |
| C6    | C7    | C8    | 117.7(4) | C11   | C16   | C15   | 119.1(4) |
| C6    | C7    | C10   | 121.0(4) |       |       |       |          |

**Table 5.** Hydrogen-Bonded Interactions

| D–H···A                  | D–H<br>(Å) | H···A<br>(Å) | D···A<br>(Å) | ∠D–H···A<br>(deg) |
|--------------------------|------------|--------------|--------------|-------------------|
| O1–H1O···O1 <sup>a</sup> | 0.73(6)    | 2.29(6)      | 2.9485(18)   | 150(6)            |

<sup>a</sup>At  $x, 1/2-y, 1/2+z$ .

**Table 6.** Torsional Angles (deg)

| Atom1 | Atom2 | Atom3 | Atom4 | Angle     | Atom1 | Atom2 | Atom3 | Atom4 | Angle     |
|-------|-------|-------|-------|-----------|-------|-------|-------|-------|-----------|
| C11   | O2    | C3    | C2    | 159.5(3)  | I1    | C5    | C6    | C7    | 177.3(3)  |
| C3    | O2    | C11   | C12   | -173.2(3) | C4    | C5    | C6    | C7    | -0.3(6)   |
| C3    | O2    | C11   | C16   | 5.4(6)    | C5    | C6    | C7    | C8    | 1.7(6)    |
| C17   | O3    | C12   | C11   | -176.7(4) | C5    | C6    | C7    | C10   | -177.6(4) |
| C17   | O3    | C12   | C13   | 4.3(7)    | C6    | C7    | C8    | C9    | -0.9(6)   |
| C4    | C1    | C2    | O1    | -175.0(3) | C10   | C7    | C8    | C9    | 178.4(4)  |
| C4    | C1    | C2    | C3    | 65.1(4)   | C7    | C8    | C9    | I2    | -178.9(3) |
| C2    | C1    | C4    | C5    | -100.8(4) | C7    | C8    | C9    | C4    | -1.4(7)   |
| C2    | C1    | C4    | C9    | 79.0(5)   | O2    | C11   | C12   | O3    | -1.6(5)   |
| O1    | C2    | C3    | O2    | 67.9(4)   | O2    | C11   | C12   | C13   | 177.5(4)  |
| C1    | C2    | C3    | O2    | -174.0(3) | C16   | C11   | C12   | O3    | 179.8(4)  |
| C1    | C4    | C5    | I1    | 0.6(5)    | C16   | C11   | C12   | C13   | -1.2(6)   |
| C1    | C4    | C5    | C6    | 178.0(4)  | O2    | C11   | C16   | C15   | -176.0(4) |
| C9    | C4    | C5    | I1    | -179.2(3) | C12   | C11   | C16   | C15   | 2.5(6)    |
| C9    | C4    | C5    | C6    | -1.8(6)   | O3    | C12   | C13   | C14   | 178.2(5)  |
| C1    | C4    | C9    | I2    | 0.1(5)    | C11   | C12   | C13   | C14   | -0.8(7)   |
| C1    | C4    | C9    | C8    | -177.2(4) | C12   | C13   | C14   | C15   | 1.3(8)    |
| C5    | C4    | C9    | I2    | 180.0(3)  | C13   | C14   | C15   | C16   | 0.1(7)    |
| C5    | C4    | C9    | C8    | 2.6(6)    | C14   | C15   | C16   | C11   | -2.0(7)   |

**Table 7.** Anisotropic Displacement Parameters ( $U_{ij}$ , Å<sup>2</sup>)

| Atom | $U_{11}$    | $U_{22}$    | $U_{33}$    | $U_{23}$     | $U_{13}$    | $U_{12}$     |
|------|-------------|-------------|-------------|--------------|-------------|--------------|
| I1   | 0.04579(17) | 0.03350(15) | 0.02917(15) | -0.00375(10) | 0.01044(11) | -0.00345(11) |
| I2   | 0.03196(14) | 0.02755(14) | 0.04114(17) | -0.00503(10) | 0.00350(11) | 0.00278(10)  |
| O1   | 0.0429(17)  | 0.0235(14)  | 0.0381(18)  | 0.0017(13)   | -0.0106(14) | -0.0095(13)  |
| O2   | 0.0310(14)  | 0.0260(14)  | 0.0363(16)  | 0.0002(12)   | -0.0105(12) | -0.0003(11)  |
| O3   | 0.0429(18)  | 0.0454(18)  | 0.0386(18)  | -0.0054(15)  | -0.0078(14) | -0.0130(15)  |
| C1   | 0.0264(17)  | 0.0248(18)  | 0.0253(19)  | 0.0031(14)   | -0.0032(14) | -0.0029(15)  |
| C2   | 0.0277(17)  | 0.0215(17)  | 0.0244(19)  | 0.0020(14)   | -0.0067(14) | -0.0003(14)  |
| C3   | 0.0255(17)  | 0.0232(17)  | 0.0266(19)  | 0.0006(14)   | -0.0043(14) | -0.0019(14)  |
| C4   | 0.0269(17)  | 0.0224(17)  | 0.0261(19)  | 0.0009(14)   | -0.0055(14) | -0.0010(14)  |
| C5   | 0.0252(17)  | 0.0261(18)  | 0.030(2)    | -0.0015(15)  | -0.0042(15) | 0.0003(15)   |
| C6   | 0.0294(18)  | 0.0225(18)  | 0.041(2)    | -0.0022(16)  | -0.0010(17) | -0.0003(15)  |
| C7   | 0.0256(18)  | 0.028(2)    | 0.038(2)    | 0.0016(17)   | 0.0006(16)  | -0.0051(16)  |
| C8   | 0.0243(17)  | 0.030(2)    | 0.037(2)    | 0.0033(17)   | 0.0030(16)  | -0.0005(16)  |
| C9   | 0.0252(17)  | 0.0181(16)  | 0.032(2)    | -0.0026(14)  | -0.0010(15) | 0.0011(14)   |
| C10  | 0.036(2)    | 0.028(2)    | 0.066(3)    | 0.006(2)     | 0.009(2)    | -0.0068(18)  |
| C11  | 0.0211(17)  | 0.0311(19)  | 0.034(2)    | 0.0040(16)   | -0.0009(15) | -0.0021(15)  |
| C12  | 0.0270(18)  | 0.045(2)    | 0.027(2)    | 0.0053(18)   | -0.0004(16) | -0.0058(18)  |
| C13  | 0.033(2)    | 0.061(3)    | 0.039(3)    | 0.019(2)     | -0.0066(19) | -0.007(2)    |
| C14  | 0.030(2)    | 0.057(3)    | 0.064(4)    | 0.027(3)     | -0.004(2)   | 0.008(2)     |
| C15  | 0.031(2)    | 0.038(2)    | 0.056(3)    | 0.010(2)     | 0.006(2)    | 0.0057(19)   |
| C16  | 0.0262(18)  | 0.031(2)    | 0.039(2)    | 0.0017(17)   | 0.0021(16)  | 0.0001(16)   |
| C17  | 0.060(3)    | 0.073(4)    | 0.032(3)    | 0.000(2)     | -0.008(2)   | -0.036(3)    |

The form of the anisotropic displacement parameter is:

$$\exp[-2\pi^2(h^2a^2U_{11} + k^2b^2U_{22} + l^2c^2U_{33} + 2klb^*c^*U_{23} + 2hla^*c^*U_{13} + 2hka^*b^*U_{12})]$$



**Table 8.** Derived Atomic Coordinates and Displacement Parameters for Hydrogen Atoms

| Atom | <i>x</i> | <i>y</i> | <i>z</i> | $U_{eq}, \text{\AA}^2$ |
|------|----------|----------|----------|------------------------|
| H1A  | -0.0068  | 0.2068   | -0.2498  | 0.031                  |
| H1B  | 0.0881   | 0.1754   | -0.3916  | 0.031                  |
| H2   | 0.1208   | 0.1959   | 0.1090   | 0.030                  |
| H3A  | 0.2200   | 0.1248   | -0.0094  | 0.030                  |
| H3B  | 0.3018   | 0.1541   | -0.1894  | 0.030                  |
| H6   | -0.0489  | 0.0268   | -0.2894  | 0.037                  |
| H8   | -0.2413  | 0.1013   | 0.1820   | 0.037                  |
| H10A | -0.3082  | 0.0136   | -0.0304  | 0.052                  |
| H10B | -0.2231  | 0.0122   | 0.2104   | 0.052                  |
| H10C | -0.1779  | -0.0137  | -0.0221  | 0.052                  |
| H13  | 0.6121   | 0.1242   | 0.7140   | 0.054                  |
| H14  | 0.6177   | 0.0485   | 0.5795   | 0.061                  |
| H15  | 0.5026   | 0.0263   | 0.2394   | 0.049                  |
| H16  | 0.3790   | 0.0806   | 0.0250   | 0.039                  |
| H17A | 0.5277   | 0.2411   | 0.7494   | 0.067                  |
| H17B | 0.5287   | 0.1906   | 0.8630   | 0.067                  |
| H17C | 0.6363   | 0.2055   | 0.6889   | 0.067                  |
